# Supplementary material
Source: PubMed Central journal article supplement (PMC10375891)
Supplement: oc3c00294_si_001.pdf [file oc3c00294_si_001.pdf]

**Supporting Information File 1 for:**

**Absolute Affinities from Quantitative Shotgun Glycomics Using Concentration-Independent (COIN) Native Mass Spectrometry**

Duong T. Bui,<sup>1</sup> James Favell,<sup>1</sup> Elena N. Kitova,<sup>1</sup> Zhixiong Li,<sup>1</sup> Kelli A. McCord,<sup>1</sup> Edward N. Schmidt<sup>1</sup>, Fahima Mozaneh,<sup>1</sup> Mohamed Elaish,<sup>2,3</sup> Amr El-Hawiet,<sup>4</sup> Yves St-Pierre,<sup>5</sup> Tom C. Hobman,<sup>2,6,7</sup> Matthew S. Macauley,<sup>1,6</sup> Lara K. Mahal,<sup>1</sup> Morris R. Flynn,<sup>8</sup> and John S. Klassen<sup>1\*</sup>

<sup>1</sup>*Department of Chemistry, University of Alberta, Edmonton, Alberta, Canada T6G 2G2*

<sup>2</sup>*Department of Cell Biology, University of Alberta, Edmonton, AB, Canada T6G 2H7*

<sup>3</sup>*Poultry Diseases Department, Faculty of Veterinary Medicine, Cairo University, Giza, Egypt*

<sup>4</sup>*Department of Pharmacognosy, Faculty of Pharmacy, Alexandria University, Alexandria, Egypt*

<sup>5</sup>*Institut National de la Recherche Scientifique (INRS), INRS-Centre Armand-Frappier Santé*

*Biotechnologie, Laval, QC, Canada H7V 1B7*

<sup>6</sup>*Department of Medical Microbiology and Immunology, University of Alberta, Edmonton, AB,*

*Canada T6G 2E1*

<sup>7</sup>*Li Ka Shing Institute of Virology, University of Alberta, Edmonton, Alberta, Canada. T6G 2E1*

<sup>8</sup>*Department of Mechanical Engineering, Faculty of Engineering, University of Alberta,*

*Edmonton, Alberta, Canada T6G 1H9*

\* Corresponding Author:

Department of Chemistry

University of Alberta

Edmonton, AB CANADA T6G 2G2

Email: john.klassen@ualberta.ca

Telephone: (780) 492-3501

<https://orcid.org/0000-0002-3389-7112>

## Table of contents

|                                                                                                                                                                                                                     |     |
|---------------------------------------------------------------------------------------------------------------------------------------------------------------------------------------------------------------------|-----|
| <b>Materials and methods</b> .....                                                                                                                                                                                  | S5  |
| Production of <i>N</i> -glycan libraries.....                                                                                                                                                                       | S5  |
| Production of glycopeptide libraries.....                                                                                                                                                                           | S5  |
| Remodeling of <i>N</i> -glycan libraries.....                                                                                                                                                                       | S5  |
| Preparation of deuterated 5-(acetyl-2,2,2-d <sub>3</sub> -amino)-(2→3)-O-β-D-galactopyranosyl-(1→4)-β-D-glucopyranose.....                                                                                          | S6  |
| Isothermal titration calorimetry.....                                                                                                                                                                               | S7  |
| HILIC-UHPLC analysis.....                                                                                                                                                                                           | S8  |
| Mass spectrometry.....                                                                                                                                                                                              | S9  |
| Calculation of glycan concentration in diffusion experiments in the presence of GBP .....                                                                                                                           | S9  |
| Assessing the dynamic range of COIN-CaR-nMS.....                                                                                                                                                                    | S10 |
| Pseudovirus production and transduction and Pharmacological modulation of <i>N</i> -glycan type...S10                                                                                                               |     |
| Authentic SARS-CoV-2 viral infection assays.....                                                                                                                                                                    | S10 |
| <b>Tables</b> .....                                                                                                                                                                                                 | S12 |
| <b>Table S1.</b> Glycan ID, chemical composition, symbol nomenclature (SNFG) and molecular weight (MW) of purified glycans used in the study.....                                                                   | S12 |
| <b>Table S2.</b> Affinities ( $K_d$ , μM) measured by nMS and COIN-nMS for GAL-3C binding with <b>G1</b> and <b>G2</b> , GAL-7 homodimer with <b>G3</b> , fCD22 with <b>G4</b> and DC-SIGN CRD with <b>G5</b> ..... | S14 |
| <b>Table S3.</b> Affinities ( $K_d$ , μM) measured by nMS and COIN-nMS for GAL-3C binding with mixture of glycans ( <b>G2</b> , <b>G5-G13</b> ).....                                                                | S15 |
| <b>Table S4.</b> Affinities ( $K_d$ , μM) measured by nMS and COIN-nMS for GAL-7 homodimer binding with mixture of glycans ( <b>G2</b> , <b>G5-G13</b> ).....                                                       | S16 |

|                                                                                                                                                                                                 |     |
|-------------------------------------------------------------------------------------------------------------------------------------------------------------------------------------------------|-----|
| <b>Table S5.</b> Affinities ( $K_d$ , $\mu\text{M}$ ) measured by nMS and COIN-nMS for DC-SIGN CRD binding with mixture of glycans ( <b>G2</b> , <b>G5</b> , <b>G10</b> , <b>G14-G20</b> )..... | S17 |
| <b>Table S6</b> Affinities ( $K_d$ , $\mu\text{M}$ ) measured by COIN-CaR-nMS for SNA binding with <b>G21</b> , MAA with <b>G22</b> , CD22-Fc with <b>G21</b> and GNA with <b>G5</b> .....      | S18 |
| <b>Table S7</b> Affinities ( $K_d$ , $\mu\text{M}$ ) measured by COIN-CaR-nMS for SNA and Sig7-Fc with pairs of glycans at different relative concentrations.....                               | S19 |
| <b>Table S8</b> Annotation of <i>N</i> - and <i>O</i> - linked glycopeptides derived from pronase digestion of bovine fetuin.....                                                               | S20 |
| <b>Table S9</b> Annotation of <i>N</i> -linked glycopeptides derived from pronase digestion of human lactoferrin.....                                                                           | S23 |
| <b>Table S10</b> Annotation of <i>N</i> -linked glycopeptides derived from pronase digestion of bovine AGP.....                                                                                 | S25 |
| <b>Table S11</b> Annotation of <i>N</i> - and <i>O</i> -linked glycopeptides derived from pronase digestion of SARS-CoV-2 RBD.....                                                              | S27 |
| <b>Table S12.</b> Affinities of <i>N</i> -glycans from the native and NeuS treated natural libraries and 6SL ( <b>G21</b> ) and 6SLN ( <b>G23</b> ) to SNA.....                                 | S29 |
| <b>Table S13.</b> Affinities of <i>N</i> -glycans from the native and all $\alpha$ 2,3 linked natural libraries and 3SL ( <b>G22</b> ) and 3SLN ( <b>G25</b> ) to MAA.....                      | S31 |
| <b>Table S14.</b> Affinities of <i>N</i> -glycans from the native natural libraries to AAL.....                                                                                                 | S32 |
| <b>Table S15.</b> Affinities of <i>N</i> -glycans from the native natural libraries and $\alpha$ 2,6-NeuAc- and $\alpha$ 2,3-NeuAc-linked glycans to RCA-I.....                                 | S34 |
| <b>Table S16.</b> Affinities of <i>N</i> -glycans from the native natural libraries and $\alpha$ 2-6-NeuAc- and $\alpha$ 2-3-NeuAc-linked glycans to PHA-E.....                                 | S36 |

|                                                                                                                                                                                                                     |     |
|---------------------------------------------------------------------------------------------------------------------------------------------------------------------------------------------------------------------|-----|
| <b>Table S17.</b> Affinities of <i>N</i> -glycans from the native natural libraries and <b>G21</b> to CD22-Fc.....                                                                                                  | S37 |
| <b>Table S18.</b> Affinities of <i>N</i> -glycans from the native natural libraries and purified oligosaccharides to Sig7-Fc.....                                                                                   | S38 |
| <b>Table S19.</b> Affinities of <i>N</i> -glycans from the native natural libraries and purified oligosaccharides to RBD.....                                                                                       | S39 |
| <b>Figures</b> .....                                                                                                                                                                                                | S40 |
| <b>Figure S1.</b> Time-dependent concentration changes of <b>G23</b> in the presence of GBP (GAL-3C) and the best fit for the region of data after mixing onset using linear, logarithmic and quadratic models..... | S40 |
| <b>Figure S2.</b> ITC measurements of SNA binding to <b>G21</b> .....                                                                                                                                               | S41 |
| <b>Figure S3.</b> ITC measurements of MAA binding to <b>G23</b> .....                                                                                                                                               | S42 |
| <b>Figure S4.</b> Glycan composition of the enzymes treated bovine fetuin (BF).....                                                                                                                                 | S43 |
| <b>Figure S5.</b> Glycan composition of the enzymes treated human lactoferrin.....                                                                                                                                  | S44 |
| <b>Figure S6.</b> Glycan composition of the enzymes treated human bovine AGP (bAGP).....                                                                                                                            | S45 |
| <b>Figure S7.</b> Glycan composition of the enzymes treated RBD.....                                                                                                                                                | S46 |
| <b>Figure S8.</b> ITC measurements of SNA binding to <i>N</i> -glycans.....                                                                                                                                         | S47 |
| <b>Figure S9.</b> ITC measurements of SNA binding to human transferrin.....                                                                                                                                         | S48 |
| <b>Figure S10.</b> ITC measurements of RCA-I binding to <b>G34</b> .....                                                                                                                                            | S49 |
| <b>Figure S11.</b> Representative CaR-nMS mass spectrum measured for solution of Sig7-Fc and pronase digested RBD and BF.....                                                                                       | S49 |
| <b>References</b> .....                                                                                                                                                                                             | S50 |

## Materials and Methods

**Production of *N*-glycan libraries.** *N*-glycans were produced from glycoproteins using PNGase F (New England Biolab, Massachusetts, United States) digestion using the following protocol. After dialysis in ammonium acetate solution (200 mM, pH 6.8), the proteins were incubated with PNGase F at 37 °C for 24 h. The proteins were then dialyzed 3 times in water using Amicon Ultra-0.5 mL centrifugal filters (EMD Millipore, Billerica, MA, USA) with 10 kDa MW cut-off. The flow through containing glycans were collected and lyophilized. The dried glycans were then dissolved in mass spectrometry grade water and stored at -20 °C until used.

**Production of glycopeptide libraries.** To produce glycopeptide libraries, glycoproteins were dialyzed in ammonium acetate as described above. After that the glycoproteins were incubated with pronase (Roche Diagnostics GmbH, Mannheim, Germany) 37 °C for 7 d. The samples were then dialyzed 3 times in water using Amicon Ultra-0.5 mL centrifugal filters (EMD Millipore, Billerica, MA, USA) with 10 kDa MW cut-off. The flow through containing glycopeptides were collected and lyophilized. The dried glycopeptides were then dissolved in mass spectrometry grade water and stored at -20 °C until used.

**Remodeled *N*-glycan libraries.** Libraries with all  $\alpha$ 2-6-linked Neu5Ac/Neu5Gc. To produce glycan libraries with all  $\alpha$ 2,6-linked Neu5Ac/Neu5Gc, NeuS (neuraminidase S, New England BioLabs, MA, USA) was added to the glycoproteins solution (Ammonium acetate 200 mM, pH 6.8) and incubated for 24 h. Then the proteins were dialyzed in 200 mM ammonium acetate solution using Amicon Ultra-0.5 mL centrifugal filters (EMD Millipore, Billerica, MA, USA) with 10 kDa MW cut-off to remove the hydrolyzed Neu5Ac/Neu5c. The proteins with  $\alpha$ 2-6-Neu5Ac/Neu5Gc were then treated with PNGaseF and purified as described above. A library with all  $\alpha$ 2-3-Neu5Ac was produced from asialo bovine fetuin (aBF) by incubating with CMP-Neu5Ac

with ST3Gal4 soluble recombinant form of human sialyltransferases ST3Gal4 (UniProt Q11206, amino acid residues 41-333), expressed in Freestyle 293F cells (Thermo Fisher Scientific) as green fluorescent protein (GFP) fusions in the pGen2 vector.<sup>S1,S2</sup>

### Preparation of deuterated 5-(Acetyl-2,2,2-d<sub>3</sub>-amino)-(2→3)-O-β-D-galactopyranosyl-(1→4)-β-D-glucopyranos

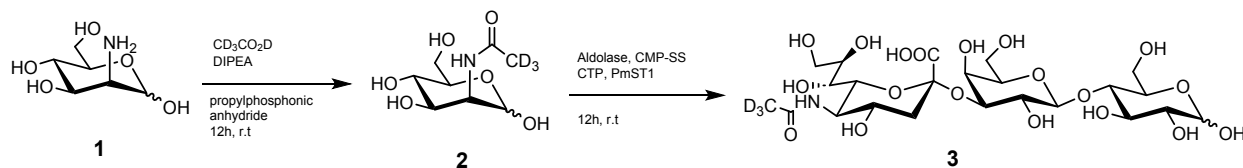

### 2-(Acetyl-2,2,2-d<sub>3</sub>-amino)-2-deoxy-α-β-D-glucopyranose 2.

To a solution of mannosamine (1 eq, 20 mg, 0.11 mmol) in pyridine (5 ml), Acetic acid D<sub>4</sub> (2 eq, 13 ul, 0.22 mmol), DIPEA (12 eq, 233 ul, 1.3 mmol) and propylphosphonic anhydride (2 eq, 68 ul, 0.22 mmol) were added, and the mixture was stirred at room temperature for 12 hours and monitored using TLC in i-PrOH:NH<sub>4</sub>OH:H<sub>2</sub>O (7: 2: 1, by volume). After completion of the reaction, the solvent was evaporated, the crude product was dissolved in water and purified on P2 gel filtration to afford **2** (21 mg, 90 % yield). <sup>1</sup>H NMR (500 MHz, D<sub>2</sub>O) δ = 5.10 (s, 1H), 5.00 (s, 1H), 4.43 (d, 1H, *J* = 3.5 Hz), 4.31 (d, 1H, *J* = 3.5 Hz), 4.14 (dd, 1H, *J* = 5.0, 10.0 Hz), 3.78 - 3.88 (m, 3H), 3.61 (t, 1H, *J* = 9.5 Hz), 3.40 (ddd, 1H, *J* = 2.5, 5.0, 7.5 Hz).

### 5-(Acetyl-2,2,2-d<sub>3</sub>-amino)-(2→3)-O-β-D-galactopyranosyl-(1→4)-β-D-glucopyranose 3.

A mixture of **2** (1 eq, 5 mg, 0.022 mmol), lactose (1.2 eq, 5 mg, 0.014 mmol), CTP (1.5 eq, 13 mg, 0.026 mmol) CMP- sialic acid synthetase (NYS05) (0.25 mg/ml), pyruvate (5 eq, 12.3 mg, 0.021 mmol), aldolase (4 mg), PmST1 (ST3) (0.15 mg/ml), and recombinant shrimp alkaline phosphatase (rSAP) (NEB) (1 μL) were dissolved in Tris-HCl (100 mM, pH 8.5) containing MgCl<sub>2</sub> (10 mM). Reaction was carried out at 37 °C for 12 and monitored in i-PrOH: NH<sub>4</sub>OH:H<sub>2</sub>O (5: 2: 1, by volume) as developing solvent. The reaction was stopped by adding 4-fold prechilled 95%

ethanol and centrifuged at 37000 rcf for 15 min. The supernatant was decanted into a round bottom flask and evaporated. The residue was resuspended in water and purified on a P2 column equilibrated in 20% NH<sub>4</sub>OH giving compound **3** (9.8 mg, 71% yield) from the reaction mixture. <sup>1</sup>H NMR (700 MHz, D<sub>2</sub>O) δ = 4.65 (d, 1H, *J* = 8.5 Hz), 4.52 (d, 1H, *J* = 7.7 Hz), 4.11 (d, 1H, *J* = 9.8 Hz), 3.71 - 3.91 (m, 4H), 3.67- 3.74 (m, 6H), 3.62 – 3.66 (m, 5H), 3.55 – 3.61 (m, 3H), 3.26 (t, 1H, *J* = 1.4 Hz), 2.76 (dd, 1H, *J* = 7.7, 9.8 Hz), 1.8 (t, 1H, *J* = 11.9 Hz).

**Isothermal Titration Calorimetry (ITC).** The ITC measurement was carried out using a Microcal PEAQ ITC (Malvern Panalytical, Worcestershire, United Kingdom). All measurements were performed in aqueous ammonium acetate solutions (200 mM, pH 6.8, 25 °C). First injection was 0.4 μL, 2 μL/injection for 2-19 injections. The reference power was adjusted for each measurement, duration 0.8 s for the first injection, 4.0 s for the rest, inject spacing was 150 s.

**SNA.** For SNA binding to **G21**, the SNA solution (50 μM) in the sample cell was titrated with a solution of **G21** (6SL, 0.5 mM). The reference power was 5 μW. For SNA binding to human transferrin (TF), SNA (21 μM) in the sample cell was titrated with TF (0.5 mM) or NeuC (Sigma-Aldrich, Oakville, Canada)-treated TF (0.3 mM); the reference power was 20 μW. For SNA binding to free *N*-glycans (released from TF and NeuC-treated TF using PNGase F), SNA (10 μM) in the sample cell was titrated with *N*-glycans from TF (0.3 mM) or NeuC-treated TF (0.1 mM); the reference power was 30 μW.

**MAA.** For the MAA binding to **G22** (3SL), MAA solution (38.5 μM) in the sample cell was titrated with solution of **G22** (0.5 mM); the reference power was 20 μW.

**RCA-I.** For RCA-I binding to **G34** glycan, RCA-I (3 μM) in cell was titrated with **G34** (30 μM); the reference power was 30 μW.

**HILIC-UHPLC-ESI-MS analysis.** Glycans were labeled with procainamide, as described previously, prior to LC analysis.<sup>S3</sup> HILIC analysis of the glycan libraries was performed using a Thermo Scientific™ Vanquish™ UHPLC system coupled with fluorescent (FLD) detector (Thermo Scientific, Waltham, MA, USA) and ESI-MS (Thermo Q Exactive Orbitrap). The glycans were separated HILIC using a Waters BEH Glycan column 150x2.1 mm i.d, with BEH particles size of 1.7  $\mu\text{m}$ . The eluents were ammonium formate 100 mM (pH 4.5) (A) and acetonitrile (B). Separation was performed at a flow rate of 0.2 mL min<sup>-1</sup> with following gradients: 0-46.5 min, 75-65% B; 46.5-80 min, 65-55% B; 80-104.6 min, 55-50% B. The injection volume was 4  $\mu\text{L}$ . The column compartment temperature was maintained at 60 °C.

The fluorescence excitation and detection wavelengths were  $\lambda_{\text{ex}} = 310$  and  $\lambda_{\text{em}} = 370$  nm. The ESI-MS parameters were set as followed: sheath gas flow rate, 40 arb, capillary temperature, 275 °C, probe heater temperature, 250 °C, aux gas flowrate, 10 arb, spray voltage, 2.5 kV. The  $m/z$  range was 250-3000 in positive mode. The resolution for full MS analysis was at 70000. The maximum injection time was 100 ms and the automatic gain control (AGC) target was at  $1 \times 10^6$ . The MS spectra were recorded using Xcalibur (Thermo, Version 4.1).

The glycan composition corresponding to each peak identified by HILIC analysis was preliminarily assigned according to the MS, MS/MS data with the aid of the Glycoworkbench software and known biosynthetic pathways of *N*-glycan.<sup>S4</sup> The structures of separated isomers were then assigned according to the measured retention times (known as Glucose Unit (GU)).<sup>S4,S5</sup> In addition to the GU, the linkage and branch of the sialic acid were confirmed by treating the glycans with NeuS.<sup>S6</sup>



## **Mass Spectrometry.**

Measurements were performed on a Q-Exactive Orbitrap mass spectrometer (Classic) and a Q-Exactive Ultra-High Mass Range (UHMR) Orbitrap mass spectrometer (Thermo Fisher Scientific, Bremen, Germany). Both instruments were equipped with a modified nanoflow ESI source. NanoESI tips were produced from borosilicate glass capillaries (1.0 mm outside diameter (o.d.), 0.78 mm inner diameter (i.d.), 10 cm length or 1.2 mm o.d., 0.69 mm i.d., 10 cm length) using a P-1000 micropipette puller or a P-97 micropipette puller (Sutter Instruments, CA). To perform nanoESI, a voltage of approximately +0.5 to +0.9 kV was applied to a platinum wire inserted inside the nanoESI tip and in contact with the solution. The solution temperature was 25 °C. Resolutions (resolving power) of 12,500 or 17,500 were used for most of the protein-glycan systems except for DC-SIGN CRD (where resolution of 140,000 was used) for direct binding measurements. For the CaR-ESI-MS measurements, a resolving power of 25,000 was used. Maximum injection time was 200 ms, the S-lens RF level was 100 and DC offset was 20-100. Raw data were processed using the Thermo Xcalibur 4.2 software. Time-resolved mass spectra were averaged over 1 min intervals and the sum of the charge state-normalized abundances of the reactant and the complex ions were calculated automatically using the SWARM software (<https://github.com/pkitov/CUPRA-SWARM>).<sup>S7</sup> For mass spectra acquired for the glycoprotein sample, which exhibit poorly resolved or unresolved peaks, as well as spectral overlap between free and bound species, analysis was performed using charge state-normalized peak areas that were determined by fitting the ion signal with Gaussian functions using the Igor pro multifit tool (WaveMetrics Inc., Lake Oswego, OR, USA) and SWARM. Glycopeptides were confirmed by molecular weight, m/z and isotopic pattern obtained by Bruker DataAnalysis software.

## **Calculation of glycan concentration in diffusion experiment in the presence of GBP**

The time-resolved glycan concentrations were calculated from the known affinity ( $K_d$ ) of the glycan ligand for the GBP and the relative abundance of free and ligand-bound GBP ions obtained from ESI-MS measurements (eq S1):

$$[L] = K_d R + \frac{[P]_0 R}{1 + R} \quad (\text{S1})$$

where  $[P]_0$  is the initial GBP concentration and  $R$  is the abundance ratio of free-to-bound GBP (eq 3).

**Assessing the dynamic range of COIN-CaR-nMS.** To assess the dynamic range of COIN-CaR-nMS, affinity measurements were performed on Sig7-Fc and SNA and a mixture of two ligands (6SL (**G21**) and GD2 (**G29**) (Sig7-Fc) and 6SL (**G21**) and 6SLN (**G23**) (SNA)). For these experiments, one ligand was maintained at a fixed concentration (30  $\mu\text{M}$ ), the concentration of the other was varied from 10  $\mu\text{M}$  to 10 nM.

**Pseudovirus production and transduction and Pharmacological modulation of *N*-glycan type.** Pseudovirus production and transduction were performed as described previously.<sup>S8</sup> Pharmacological modulation of *N*-glycan type was conducted as following: stocks of kifunensine (Sigma-Aldrich) were prepared at 5 mM concentration in sterile  $\text{H}_2\text{O}$ . Approximately 70,000 cells in 250  $\mu\text{L}$  of Dulbecco's Modified Eagle Medium (DMEM) growth media (Gibco) containing 10% Fetal Bovine Serum (FBS, Gibco), 100 U/mL Penicillin (Gibco), 100  $\mu\text{g}/\text{mL}$  Streptomycin (Gibco), and  $\mu\text{g}/\text{mL}$  Blastidicin (InvivoGen), were seeded in a 24-well plate in triplicate. Kifunensine, or  $\text{H}_2\text{O}$  as a negative control, was added to wells at 1:1000 dilution (5  $\mu\text{M}$ ). Cells were incubated at 37  $^\circ\text{C}$ , 5%  $\text{CO}_2$  for 72 hours.

### **SARS-CoV-2 infection assays**

All experiments with SARS-CoV-2 virus were performed under biosafety level 3 (BSL3) conditions. ACE2<sup>+</sup> HEK293 cells were cultured using Complete DMEM supplemented with 10% FBS and Blasticidin.<sup>S8</sup> SARS-CoV-2 (hCoV-19/Canada/ON-VIDO-01/2020, GISAID accession EPI\_ISL\_425177) was kindly provided by D. Falzarano (Vaccine and Infectious Disease Organization).

ACE2<sup>+</sup> HEK293 cells were seeded in 96-well plates ( $1 \times 10^4$  cells per well), and the next day, the cells were treated with kifunesine or H<sub>2</sub>O and remdesivir as a positive control for inhibiting SARS-CoV-2 replication. After 72 h, cells were infected with the indicated strains of SARS-CoV2 using an MOI of 0.1 . The virus-containing inoculum was removed after 1 h and replaced with complete fresh medium. Cells were incubated for an additional 24 h before collection of the medium for a plaque assay. Briefly, approximately  $1 \times 10^5$  Vero cells were seeded in a 24-well plate. After a 24-h incubation, cells were infected with serial dilutions of virus-containing medium (0.2 ml) for 1 h with occasional rocking, after which 1.0 ml of medium containing 0.75% carboxymethyl cellulose was added to the wells. Cells were incubated for 72–96 h to allow plaque formation, after which samples were fixed with 10% formaldehyde, washed with water and stained with 1% crystal violet in 20% ethanol. After extensive washing with water, plaques were counted, and viral titers (PFU per ml) were determined.

## Tables

**Table S1.** Glycan ID, chemical composition, symbol nomenclature (SNFG) and molecular weight (MW) of purified glycans used in the study.<sup>a</sup>

| Glycan ID  | Chemical composition                                                                                                                                                                                                                                       | Symbol structure                                                                      | MW      |
|------------|------------------------------------------------------------------------------------------------------------------------------------------------------------------------------------------------------------------------------------------------------------|---------------------------------------------------------------------------------------|---------|
| <b>G1</b>  | $\alpha$ -D-Gal-(1→3)-[ $\alpha$ -L-Fuc(1→2)]- $\beta$ -D-Gal(1→4)-D-GlcNAc                                                                                                                                                                                | 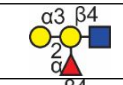   | 691.25  |
| <b>G2</b>  | $\alpha$ -L-Fuc-(1→2)- $\beta$ -D-Gal-(1→4)-D-Glc                                                                                                                                                                                                          |    | 488.17  |
| <b>G3</b>  | (Gal-(1→4)-[ $\alpha$ -L-Fuc(1→3)]- $\beta$ -D-GlcNAc-(1→3)- $\beta$ -D-Gal(1→4)[ $\alpha$ -L-Fuc(1→3)]-D-Glc                                                                                                                                              |    | 999.36  |
| <b>G4</b>  | [ $\alpha$ -D-Neu5Ac-(2→6)- $\beta$ -D-Gal-(1→4)- $\beta$ -D-GlcNAc-(1→2)- $\alpha$ -D-Man-(1→3)]-[ $\alpha$ -D-Neu5Ac-(2→6)- $\beta$ -D-Gal-(1→4)- $\beta$ -D-GlcNAc-(1→2)- $\alpha$ -D-Man-(1→6)]- $\beta$ -D-Man(1→4)- $\beta$ -D-GlcNAc-(1→4)-D-GlcNAc |    | 2222.78 |
| <b>G5</b>  | $\alpha$ -D-Man-(1→2)- $\alpha$ -D-Man-(1→6)-[Man-(1→2)- $\alpha$ -D-Man-(1→3)]- $\alpha$ -D-Man-(1→6)-[Man-(1→2)- $\alpha$ -D-Man-(1→2)- $\alpha$ -D-Man-(1→3)]- $\alpha$ -D-Man                                                                          |    | 1476.48 |
| <b>G6</b>  | $\beta$ -D-Gal(1→3)- $\beta$ -D-GlcNAc(1→3)- $\beta$ -D-Gal(1→4)-[ $\alpha$ -L-Fuc(1→3)]- $\beta$ -D-Glc                                                                                                                                                   |    | 853.31  |
| <b>G7</b>  | $\beta$ -D-Gal-(1→4)- $\beta$ -D-GlcNAc(1→3)- $\beta$ -D-Gal(1→4)- $\beta$ -D-GlcNAc(1→3)- $\beta$ -D-Gal(1→4)- $\beta$ -D-Glc                                                                                                                             |   | 1072.38 |
| <b>G8</b>  | $\beta$ -D-Gal-(1→4)- $\beta$ -D-GlcNAc-(1→3)- $\beta$ -D-Gal-(1→4)- $\beta$ -D-GlcNAc-(1→3)- $\beta$ -D-Gal-(1→4)- $\beta$ -D-GlcNAc-(1→3)- $\beta$ -D-Gal-(1→4)- $\beta$ -D-Glc                                                                          |  | 1437.51 |
| <b>G9</b>  | $\beta$ -D-Gal-(1→4)- $\beta$ -D-GlcNAc-(1→3)- $\beta$ -D-Gal-(1→4)- $\beta$ -D-Glc                                                                                                                                                                        |  | 707.25  |
| <b>G10</b> | $\alpha$ -D-GalNAc(1→3)-[ $\alpha$ -L-Fuc(1→2)]- $\beta$ -D-Gal(1→4)-D-GlcNAc                                                                                                                                                                              |  | 732.28  |
| <b>G11</b> | $\beta$ -D-Gal(1→3)-[ $\alpha$ -L-Fuc(1→4)]- $\beta$ -D-GlcNAc(1→3)- $\beta$ -D-Gal(1→4)-[ $\alpha$ -L-Fuc(1→3)]- $\beta$ -D-Glc                                                                                                                           |  | 999.36  |
| <b>G12</b> | $\alpha$ -D-GalNAc-(1→3)-[ $\alpha$ -L-Fuc-(1→2)]- $\beta$ -D-Gal-(1→4)- $\beta$ -D-Glc                                                                                                                                                                    |  | 691.25  |
| <b>G13</b> | Gly037-1 $\alpha$ -D-GalNAc-(1→3)-[ $\alpha$ -L-Fuc-(1→2)]- $\beta$ -D-Gal-(1→3)- $\beta$ -D-GlcNAc-(1→3)- $\beta$ -D-Gal-(1→4)- $\beta$ -D-Glc                                                                                                            |  | 1056.39 |
| <b>G14</b> | $\alpha$ -D-Man-(1→2)- $\alpha$ -D-Man-(1→6)-[ $\alpha$ -D-Man-(1→3)]- $\alpha$ -D-Man-(1→6)-[ $\alpha$ -D-Man-(1→2)- $\alpha$ -D-Man-(1→2)- $\alpha$ -D-Man-(1→3)]- $\alpha$ -D-Man                                                                       |  | 1314.43 |
| <b>G15</b> | $\alpha$ -D-Man-(1→2)- $\alpha$ -D-Man-(1→3)-[ $\alpha$ -D-Man-(1→6)-[ $\alpha$ -D-Man-(1→2)- $\alpha$ -D-Man-(1→3)]- $\alpha$ -D-Man                                                                                                                      |  | 1152.38 |
| <b>G16</b> | $\alpha$ -D-Man-(1→3)[ $\alpha$ -D-Man(1→6)]- $\alpha$ -D-Man(1→6)[ $\alpha$ -D-Man(1→2)- $\alpha$ -D-Man-(1→3)]- $\alpha$ -D-Man                                                                                                                          |  | 990.32  |

|            |                                                                                                                                                                 |  |         |
|------------|-----------------------------------------------------------------------------------------------------------------------------------------------------------------|--|---------|
| <b>G17</b> | $\alpha$ -L-Fuc-(1→2)- $\beta$ -D-Gal-(1→3)-[ $\alpha$ -L-Fuc(1→4)]- $\beta$ -D-GlcNAc(1→3)-Gal                                                                 |  | 837.31  |
| <b>G18</b> | $\alpha$ -D-Gal-(1→3)-[ $\alpha$ -L-Fuc(1→2)]- $\beta$ -D-Gal(1→4)-D-GlcNAc- $\beta$ -D-Gal-(1→4)- $\beta$ -D-Glc                                               |  | 1015.36 |
| <b>G19</b> | Man $\alpha$ (1-3)[Man $\alpha$ (1-6)]Man $\alpha$ (1-6)Man                                                                                                     |  | 666.22  |
| <b>G20</b> | $\alpha$ -D-Glc-(1→4)- $\alpha$ -D-Glc $\alpha$ 1-4Glc $\alpha$ 1-4Glc $\alpha$ 1-4Glc                                                                          |  | 828.27  |
| <b>G21</b> | $\alpha$ -D-Neu5Ac-(2→6)- $\beta$ -D-Gal-(1→4)-D-Glc                                                                                                            |  | 633.21  |
| <b>G22</b> | $\alpha$ -D-Neu5Ac-(2→3)- $\beta$ -D-Gal-(1→4)-D-Glc                                                                                                            |  | 633.21  |
| <b>G23</b> | $\alpha$ -D-Neu5Ac-(2→6)- $\beta$ -D-Gal-(1→4)-D-GlcNAc                                                                                                         |  | 674.24  |
| <b>G24</b> | $\alpha$ -D-GalNAc(1→3)-[ $\alpha$ -L-Fuc(1→2)]- $\beta$ -Gal(1→4)-D-GlcNAc                                                                                     |  | 732.28  |
| <b>G25</b> | $\alpha$ -D-Neu5Ac-(2→3)- $\beta$ -D-Gal-(1→4)-D-GlcNAc                                                                                                         |  | 674.24  |
| <b>G25</b> | $\alpha$ -D-Neu5Ac-(2→8)- $\alpha$ -D-Neu5Ac-(2→3)- $\beta$ -D-Gal-(1→4)-D-Glc (GD3)                                                                            |  | 924.30  |
| <b>G27</b> | $\alpha$ -D-Neu5Ac-(2→8)- $\alpha$ -D-Neu5Ac-(2→8)- $\alpha$ -D-Neu5Ac-(2→3)- $\beta$ -D-Gal-(1→4)-D-Glc (GT3)                                                  |  | 1215.40 |
| <b>G28</b> | $\alpha$ -D-GalNAc(1→4)-[ $\alpha$ -D-Neu5Ac-(2→3)]- $\beta$ -D-Gal-(1→4)-D-Glc (GM2)                                                                           |  | 836.29  |
| <b>G29</b> | $\alpha$ -D-GalNAc(1→4)-[ $\alpha$ -D-Neu5Ac-(2→8)- $\alpha$ -D-Neu5Ac-(2→3)]- $\beta$ -D-Gal-(1→4)-D-Glc (GD2)                                                 |  | 1127.38 |
| <b>G30</b> | $\alpha$ -D-GalNAc(1→4)-[ $\alpha$ -D-Neu5Ac-(2→8)- $\alpha$ -D-Neu5Ac-(2→8)- $\alpha$ -D-Neu5Ac-(2→3)]- $\beta$ -D-Gal-(1→4)-D-Glc (GT2)                       |  | 1418.48 |
| <b>G31</b> | $\beta$ -D-Gal(1→3)- $\alpha$ -D-GalNAc(1→4)-[ $\alpha$ -D-Neu5Ac-(2→3)]- $\beta$ -D-Gal-(1→4)-D-Glc (GM1)                                                      |  | 998.34  |
| <b>G32</b> | $\beta$ -D-Gal(1→3)- $\alpha$ -D-GalNAc(1→4)-[ $\alpha$ -D-Neu5Ac-(2→8)- $\alpha$ -D-Neu5Ac-(2→3)]- $\beta$ -D-Gal-(1→4)-D-Glc (GD1b)                           |  | 1289.45 |
| <b>G33</b> | $\beta$ -D-Gal(1→3)- $\alpha$ -D-GalNAc(1→4)-[ $\alpha$ -D-Neu5Ac-(2→8)- $\alpha$ -D-Neu5Ac-(2→8)- $\alpha$ -D-Neu5Ac-(2→3)]- $\beta$ -D-Gal-(1→4)-D-Glc (GT1c) |  | 1580.53 |
| <b>G34</b> | [ $\beta$ -D-GlcNAc-(1→2)- $\alpha$ -D-Man-(1→3)]-[ $\beta$ -D-GlcNAc-(1→2)- $\alpha$ -D-Man-(1→6)]- $\beta$ -D-Man(1→4)- $\beta$ -D-GlcNAc-(1→4)-D-GlcNAc      |  | 1316.49 |

<sup>a</sup> SNFG = symbol nomenclature for glycans.

**Table S2.** Affinities ( $K_d$ ,  $\mu\text{M}$ ) measured by nMS and COIN-nMS for GAL-3C binding with **G1** and **G2**, GAL-7 homodimer with **G3**, fCD22 with **G4** and DC-SIGN CRD with **G5**. Literature  $K_d$  are given as reference. Measurements were performed on ammonium acetate solutions (200 mM, pH 6.9) for GAL-3C, GAL-7 and fCD22 and a solution of ammonium acetate (200 mM) and calcium carbonate (2.5 mM) at pH 7.4 for DC-SIGN CRD.<sup>a,b</sup>

| <b>GBP</b>     | <b>Glycan ID</b> | $K_d$<br>(nMS) | Concentration<br>( $\mu\text{M}$ ) | $K_d$<br>(COIN-nMS,<br>individual<br>experiments) | $K_d$<br>(COIN-nMS,<br>global fit) | $K_d$<br>(Literature)     |
|----------------|------------------|----------------|------------------------------------|---------------------------------------------------|------------------------------------|---------------------------|
| GAL-3C         | <b>G1</b>        | 4.2±0.28       | 20<br>30<br>50                     | 3.2±0.1<br>3.7±0.1<br>5.8±0.1                     | 3.8±0.23                           | 4.5±0.3 <sup>S9</sup>     |
| GAL-3C         | <b>G2</b>        | 26.6±1.7       | 20<br>30<br>50                     | 27.0±0.5,<br>24.8±0.5<br>28.0±0.8                 | 23.2±1.8                           | 47.6 ± 4.5 <sup>S10</sup> |
| GAL-7          | <b>G3</b>        | 518.3±15.2     | 20<br>30<br>50                     | 524±2<br>507±6<br>537±6                           | 521.3±24.9                         | 500 ± 250 <sup>S10</sup>  |
| fCD22          | <b>G4</b>        | 13.1±0.6       | 30<br>50<br>75                     | 25.4±2.2,<br>37.5±0.5,<br>23.4±0.7                | 23.5±1.4                           | 13.1 ± 0.6 <sup>S3</sup>  |
| DC-SIGN<br>CRD | <b>G5</b>        | 231.0±17.3     | 75<br>100<br>125                   | 212.4±2.2,<br>246.7±1.0,<br>234.0±1.5             | 234.8±12.6                         | NA                        |

<sup>a</sup> Errors correspond to one standard deviation.

<sup>b</sup> NA  $\equiv$  not applicable.

**Table S3.** Affinities ( $K_d$ ,  $\mu\text{M}$ ) measured by nMS and COIN-nMS for GAL-3C binding to glycans (G2, G5-G13) present as a mixture. Measurements were performed on ammonium acetate solutions (200 mM, pH 6.9).<sup>a,b</sup>

| <b>Glycan ID</b> | <b><math>K_d</math> (nMS)</b> | <b><math>K_d</math> (COIN-nMS)</b> | <b>Stock concentration (<math>\mu\text{M}</math>)</b> |
|------------------|-------------------------------|------------------------------------|-------------------------------------------------------|
| <b>G2</b>        | 165.7 $\pm$ 84.5              | 156.1 $\pm$ 48.6                   | 100                                                   |
| <b>G5</b>        | NB                            | NB                                 | 100                                                   |
| <b>G6</b>        | 26.8 $\pm$ 4.7                | 101.2 $\pm$ 18.0                   | 60                                                    |
| <b>G7</b>        | 5.0 $\pm$ 1.8                 | 2.9 $\pm$ 0.9                      | 60                                                    |
| <b>G8</b>        | 5.5 $\pm$ 1.3                 | 5.8 $\pm$ 0.6                      | 100                                                   |
| <b>G9</b>        | 23.2 $\pm$ 10.1               | 12.9 $\pm$ 7.4                     | 40                                                    |
| <b>G10</b>       | 17.9 $\pm$ 3.0                | 10.9 $\pm$ 3.1                     | 150                                                   |
| <b>G11</b>       | NB                            | NB                                 | 100                                                   |
| <b>G12</b>       | 11.3 $\pm$ 2.1                | 10.4 $\pm$ 3.6                     | 60                                                    |
| <b>G13</b>       | 4.6 $\pm$ 0.9                 | 2.4 $\pm$ 0.6                      | 100                                                   |

<sup>a</sup> Errors correspond to one standard deviation. Different dilutions (2, 4, 5 or 10 times) of the glycan mixture (with the listed stock concentrations) were used. The  $K_d$  values are the average of eight measurements (duplicates for each dilution)

<sup>b</sup> NB  $\equiv$  No binding detected.

**Table S4.** Affinities ( $K_d$ ,  $\mu\text{M}$ ) measured by nMS and COIN-nMS for GAL-7 homodimer binding to glycans (**G2**, **G5-G13**) present as a mixture. Measurements were performed on ammonium acetate solutions (200 mM, pH 6.9). <sup>a,b</sup>

| <b>Glycan ID</b> | <b><math>K_d</math> (nMS)</b> | <b><math>K_d</math> (COIN-nMS)</b> | <b>Stock concentration (<math>\mu\text{M}</math>)</b> |
|------------------|-------------------------------|------------------------------------|-------------------------------------------------------|
| <b>G2</b>        | 237.4 $\pm$ 69.3              | 241.1 $\pm$ 10.7                   | 100                                                   |
| <b>G5</b>        | NB                            | NB                                 | 100                                                   |
| <b>G6</b>        | 232.4 $\pm$ 52.23             | 277.6 $\pm$ 84.8                   | 60                                                    |
| <b>G7</b>        | 348.0 $\pm$ 89.2              | 361.7 $\pm$ 143.3                  | 60                                                    |
| <b>G8</b>        | 177.6 $\pm$ 54.3              | 231.7 $\pm$ 24.9                   | 100                                                   |
| <b>G9</b>        | 348.4 $\pm$ 62.8              | 439.2 $\pm$ 158.1                  | 40                                                    |
| <b>G10</b>       | 730.6 $\pm$ 141.3             | 436.6 $\pm$ 82.4                   | 150                                                   |
| <b>G11</b>       | NB                            | NB                                 | 100                                                   |
| <b>G12</b>       | 184.3 $\pm$ 15.7              | 333.2 $\pm$ 116.8                  | 60                                                    |
| <b>G13</b>       | 261.0 $\pm$ 22.65             | 260.7 $\pm$ 119.4                  | 100                                                   |

<sup>a</sup> Errors correspond to one standard deviation. Different dilutions (2, 4, 5 or 10 times) of the glycan mixture (with the listed stock concentrations) were used. The  $K_d$  values are the average of eight measurements (duplicates for each dilution)

<sup>b</sup> NB  $\equiv$  No binding detected.



**Table S5.** Affinities ( $K_d$ , mM) measured by nMS and COIN-nMS for DC-SIGN CRD binding to glycans (**G2**, **G5**, **G10**, **G14-G20**) present as a mixture. Measurements were performed on ammonium acetate (200 mM) and calcium carbonate (2.5 mM) at pH 7.4.<sup>a</sup>

| <b>Glycan ID</b> | <b><math>K_d</math> (nMS)</b> | <b><math>K_d</math> (COIN-nMS)</b> | <b>Stock concentration (<math>\mu\text{M}</math>)</b> |
|------------------|-------------------------------|------------------------------------|-------------------------------------------------------|
| <b>G2</b>        | 2.10 $\pm$ 0.19               | 0.66 $\pm$ 0.04                    | 200                                                   |
| <b>G5</b>        | 0.23 $\pm$ 0.02               | 0.24 $\pm$ 0.04                    | 300                                                   |
| <b>G10</b>       | 6.01 $\pm$ 0.08               | 2.92 $\pm$ 1.17                    | 100                                                   |
| <b>G14</b>       | 0.27 $\pm$ 0.01               | 0.26 $\pm$ 0.03                    | 200                                                   |
| <b>G15</b>       | 0.39 $\pm$ 0.05               | 0.41 $\pm$ 0.04                    | 200                                                   |
| <b>G16</b>       | 0.81 $\pm$ 0.06               | 0.56 $\pm$ 0.03                    | 400                                                   |
| <b>G17</b>       | 0.62 $\pm$ 0.03               | 0.55 $\pm$ 0.05                    | 100                                                   |
| <b>G18</b>       | 3.33 $\pm$ 0.55               | 1.87 $\pm$ 0.36                    | 100                                                   |
| <b>G19</b>       | 1.18 $\pm$ 0.05               | 1.50 $\pm$ 0.23                    | 100                                                   |
| <b>G20</b>       | 2.41 $\pm$ 0.06               | 1.83 $\pm$ 0.54                    | 200                                                   |

<sup>a</sup> Errors correspond to one standard deviation. Different dilutions (2, 4 or 10 times) of the glycan mixture (with the listed stock concentrations) were used. The  $K_d$  values are the average of six measurements (duplicates for each dilution)

**Table S6.** Affinities ( $K_d$ ,  $\mu\text{M}$ ) measured by COIN-CaR-nMS for SNA binding with **G21**, MAA with **G22**, CD22-Fc with **G21** and GNA with **G5**.<sup>a</sup> Measurements were performed using ammonium acetate solutions (200 mM, pH 6.9).

| <b>GBP</b> | <b>Glycan ID</b> | <b><math>K_d</math> (COIN-CaR-nMS)</b> | <b><math>K_d</math> (Literature)</b> |
|------------|------------------|----------------------------------------|--------------------------------------|
| SNA        | <b>G21</b>       | $1.6 \pm 0.4$                          | $1.98 \pm 0.27$ <sup>b</sup>         |
| MAA        | <b>G22</b>       | $3.5 \pm 1.5$                          | $3.6 \pm 2.0$ <sup>b</sup>           |
| CD22-Fc    | <b>G21</b>       | $40.0 \pm 1.0$                         | $75 \pm 4$ <sup>c</sup>              |
| GNA        | <b>G5</b>        | $553.2 \pm 1.0$                        | $774.1 \pm 12.8$ <sup>d</sup>        |

<sup>a</sup> Errors correspond to one standard deviation.

<sup>b</sup> Values determined by ITC.

<sup>c</sup> Value, determined by direct MS (nMS) on CD22 fragment (fCD22), taken from ref S11.

<sup>d</sup> Value determined by direct nMS.

**Table S7.** Affinities ( $K_d$ ,  $\mu\text{M}$ ) measured by COIN-CaR-nMS for SNA binding with **G23** (0.05 - 10  $\mu\text{M}$ ) and **G21** (30  $\mu\text{M}$ ), and for Sig7-Fc with **G21** (0.1 - 10  $\mu\text{M}$ ) and **G29** (30  $\mu\text{M}$ ).<sup>a</sup> Measurements were performed using ammonium acetate solutions (200 mM, pH 6.9).

| <b>GBP</b>  | <b>G23<br/>concentration<br/>(<math>\mu\text{M}</math>)</b> | <b>G21<br/>concentration<br/>(<math>\mu\text{M}</math>)</b> | <b>G29<br/>concentration<br/>(<math>\mu\text{M}</math>)</b> | <b><math>K_d</math> G21</b> | <b><math>K_d</math><br/>G23<br/>(SNA)</b> | <b><math>K_d</math> G29<br/>(Sig7-Fc)</b> |
|-------------|-------------------------------------------------------------|-------------------------------------------------------------|-------------------------------------------------------------|-----------------------------|-------------------------------------------|-------------------------------------------|
| SNA         | 10                                                          | 30                                                          | -                                                           | $2.0 \pm 0.4$               | $0.7 \pm 0.2$                             | -                                         |
| SNA         | 5                                                           | 30                                                          | -                                                           | $1.5 \pm 0.3$               | $0.9 \pm 0.1$                             | -                                         |
| SNA         | 1.0                                                         | 30                                                          | -                                                           | $3.3 \pm 0.2$               | $0.4 \pm 0.1$                             | -                                         |
| SNA         | 0.5                                                         | 30                                                          | -                                                           | $1.7 \pm 0.5$               | $0.3 \pm 0.1$                             | -                                         |
| SNA         | 0.1                                                         | 30                                                          | -                                                           | $1.6 \pm 0.4$               | $0.4 \pm 0.1$                             | -                                         |
| SNA         | 0.05                                                        | 30                                                          | -                                                           | $1.8 \pm 0.5$               | $0.6 \pm 0.3$                             | -                                         |
| Sig7-<br>Fc | -                                                           | 10                                                          | 30                                                          | $249 \pm 20$                | -                                         | $240 \pm 10$                              |
| Sig7-<br>Fc | -                                                           | 5                                                           | 30                                                          | $366 \pm 10$                | -                                         | $240 \pm 2$                               |
| Sig7-<br>Fc | -                                                           | 1.0                                                         | 30                                                          | $239 \pm 50$                | -                                         | $184 \pm 5$                               |
| Sig7-<br>Fc | -                                                           | 0.5                                                         | 30                                                          | $284 \pm 70$                | -                                         | $215 \pm 20$                              |

<sup>a</sup> Errors correspond to one standard deviation.

**Table S8.** Annotation of *N*- and *O*- linked glycopeptides obtained from pronase digestion of bovine fetuin (Uniprot protein sequence P12763).<sup>a,b</sup>

| No. | m/z     | Peptides                                                 | Glycan composition                                                         | Ion type                | $\Delta$<br>m/z |
|-----|---------|----------------------------------------------------------|----------------------------------------------------------------------------|-------------------------|-----------------|
| 1   | 760.272 | <b>S</b>                                                 | HexNAc <sub>1</sub> Hex <sub>1</sub> NeuAc <sub>1</sub>                    | [M-H] <sup>-</sup>      |                 |
| 2   | 773.014 | <b>NC</b>                                                | HexNAc <sub>5</sub> Hex <sub>6</sub> NeuAc <sub>3</sub>                    | [M-4H] <sup>4-</sup>    | 0.001           |
| 3   | 776.018 | <b>ND</b>                                                | HexNAc <sub>5</sub> Hex <sub>6</sub> NeuAc <sub>3</sub>                    | [M-4H] <sup>4-</sup>    | 0.002           |
| 4   | 783.275 | <b>NGS</b>                                               | HexNAc <sub>5</sub> Hex <sub>6</sub> NeuAc <sub>3</sub>                    | [M-4H] <sup>4-</sup>    | 0.002           |
| 5   | 787.274 | <b>NGS</b>                                               | HexNAc <sub>5</sub> Hex <sub>6</sub> NeuAc <sub>2</sub> NeuGc <sub>1</sub> | [M-4H] <sup>4-</sup>    | 0.002           |
| 6   | 793.274 | <b>LAN</b>                                               | HexNAc <sub>5</sub> Hex <sub>6</sub> NeuAc <sub>3</sub>                    | [M-4H] <sup>4-</sup>    | 0.019           |
| 7   | 797.777 | <b>NDS</b>                                               | HexNAc <sub>5</sub> Hex <sub>6</sub> NeuAc <sub>3</sub>                    | [M-4H] <sup>4-</sup>    | 0.001           |
| 8   | 800.322 | <sup>269</sup> (A) <b>PSAVPD</b> (A) <sup>276</sup>      | HexNAc <sub>1</sub> Hex <sub>1</sub> NeuAc <sub>2</sub>                    | [M-2H] <sup>2-</sup>    | 0.001           |
| 9   | 802.765 | <sup>99</sup> <b>NC</b> <sup>100</sup> ↔ <sup>89</sup> C | HexNAc <sub>5</sub> Hex <sub>6</sub> NeuAc <sub>3</sub>                    | [M-4H] <sup>4-</sup>    | 0.003           |
| 10  | 805.033 | <b>SNGS</b>                                              | HexNAc <sub>5</sub> Hex <sub>6</sub> NeuAc <sub>3</sub>                    | [M-4H] <sup>4-</sup>    | 0.003           |
| 11  | 806.764 | <sup>99</sup> <b>NC</b> <sup>100</sup> ↔ <sup>89</sup> C | HexNAc <sub>5</sub> Hex <sub>6</sub> NeuAc <sub>2</sub> NeuGc <sub>1</sub> | [M-4H] <sup>4-</sup>    | 0.001           |
| 12  | 811.314 | <sup>269</sup> (A) <b>PSAVPD</b> (A) <sup>276</sup>      | HexNAc <sub>1</sub> Hex <sub>1</sub> NeuAc <sub>2</sub>                    | [M-3H+Na] <sup>2-</sup> | 0.001           |
| 13  | 812.280 | <b>NC</b>                                                | HexNAc <sub>4</sub> Hex <sub>5</sub> NeuAc <sub>2</sub>                    | [M-3H] <sup>3-</sup>    | 0.001           |
| 14  | 816.283 | <b>ND</b>                                                | HexNAc <sub>4</sub> Hex <sub>5</sub> NeuAc <sub>2</sub>                    | [M-3H] <sup>3-</sup>    | 0.001           |
| 15  | 836.801 | <sup>56</sup> <b>NDSR</b> <sup>159</sup>                 | HexNAc <sub>5</sub> Hex <sub>6</sub> NeuAc <sub>3</sub>                    | [M-4H] <sup>4-</sup>    | 0.003           |
| 16  | 839.289 | <b>LAN</b>                                               | HexNAc <sub>4</sub> Hex <sub>5</sub> NeuAc <sub>2</sub>                    | [M-3H] <sup>3-</sup>    | 0.030           |
| 17  | 845.293 | <b>NDS</b>                                               | HexNAc <sub>4</sub> Hex <sub>5</sub> NeuAc <sub>2</sub>                    | [M-3H] <sup>3-</sup>    | 0.002           |
| 18  | 851.945 | <sup>99</sup> <b>NC</b> <sup>100</sup> ↔ <sup>89</sup> C | HexNAc <sub>4</sub> Hex <sub>5</sub> NeuAc <sub>2</sub>                    | [M-3H] <sup>3-</sup>    | 0.002           |
| 19  | 856.048 | <b>NGS</b>                                               | HexNAc <sub>5</sub> Hex <sub>6</sub> NeuAc <sub>4</sub>                    | [M-4H] <sup>4-</sup>    | 0.002           |
| 20  | 859.342 | <b>SV</b>                                                | HexNAc <sub>1</sub> Hex <sub>1</sub> NeuAc <sub>1</sub>                    | [M-H] <sup>-</sup>      | 0.002           |
| 21  | 870.550 | <b>NDS</b>                                               | HexNAc <sub>5</sub> Hex <sub>6</sub> NeuAc <sub>4</sub>                    | [M-4H] <sup>4-</sup>    | 0.002           |
| 22  | 877.807 | <b>SNGS</b>                                              | HexNAc <sub>5</sub> Hex <sub>6</sub> NeuAc <sub>4</sub>                    | [M-4H] <sup>4-</sup>    | 0.003           |
| 23  | 881.320 | <b>SV</b>                                                | HexNAc <sub>1</sub> Hex <sub>1</sub> NeuAc <sub>1</sub>                    | [M-2H+Na] <sup>-</sup>  | 0.002           |
| 24  | 883.839 | <sup>278</sup> <b>GPTPS</b> <sup>282</sup>               | 2x(HexNAc <sub>1</sub> Hex <sub>1</sub> NeuAc <sub>1</sub> )               | [M-2H] <sup>2-</sup>    | 0.005           |
| 25  | 897.331 | <sup>156</sup> <b>NDSR</b> <sup>159</sup>                | HexNAc <sub>4</sub> Hex <sub>5</sub> NeuAc <sub>2</sub>                    | [M-3H] <sup>3-</sup>    | 0.003           |
| 26  | 909.574 | <sup>56</sup> <b>NDSR</b> <sup>159</sup>                 | HexNAc <sub>5</sub> Hex <sub>6</sub> NeuAc <sub>4</sub>                    | [M-4H] <sup>4-</sup>    | 0.004           |
| 27  | 919.357 | <sup>277</sup> (A) <b>GPTPS</b> (A) <sup>282</sup>       | HexNAc <sub>2</sub> Hex <sub>2</sub> NeuAc <sub>2</sub>                    | [M-2H] <sup>2-</sup>    | 0.007           |
| 28  | 928.364 | <sup>270</sup> <b>PSA</b> <sup>272</sup>                 | HexNAc <sub>1</sub> Hex <sub>1</sub> NeuAc <sub>1</sub>                    | [M-H] <sup>-</sup>      | 0.000           |
| 29  | 933.991 | <b>NC</b>                                                | HexNAc <sub>5</sub> Hex <sub>6</sub> NeuAc <sub>1</sub>                    | [M-3H] <sup>3-</sup>    | 0.002           |
| 30  | 937.995 | <b>ND</b>                                                | HexNAc <sub>5</sub> Hex <sub>6</sub> NeuAc <sub>1</sub>                    | [M-3H] <sup>3-</sup>    | 0.000           |
| 31  | 947.668 | <b>NGS</b>                                               | HexNAc <sub>5</sub> Hex <sub>6</sub> NeuAc <sub>1</sub>                    | [M-3H] <sup>3-</sup>    | 0.002           |
| 32  | 958.669 | -                                                        | HexNAc <sub>5</sub> Hex <sub>6</sub> NeuAc <sub>3</sub>                    | [M-3H] <sup>3-</sup>    | 0.001           |
| 33  | 961.000 | <b>LAN</b>                                               | HexNAc <sub>5</sub> Hex <sub>6</sub> NeuAc <sub>1</sub>                    | [M-3H] <sup>3-</sup>    | 0.026           |
| 34  | 967.006 | <sup>156</sup> <b>NDS</b> <sup>158</sup>                 | HexNAc <sub>5</sub> Hex <sub>6</sub> NeuAc <sub>2</sub>                    | [M-3H] <sup>3-</sup>    | 0.004           |
| 35  | 973.660 | <sup>99</sup> <b>NC</b> <sup>100</sup> ↔ <sup>89</sup> C | HexNAc <sub>5</sub> Hex <sub>6</sub> NeuAc <sub>2</sub>                    | [M-3H] <sup>3-</sup>    | 0.007           |
| 36  | 982.890 | <sup>269</sup> (A) <b>PSAVPD</b> (A) <sup>276</sup>      | HexNAc <sub>2</sub> Hex <sub>2</sub> NeuAc <sub>2</sub>                    | [M-2H] <sup>2-</sup>    | 0.000           |
| 37  | 993.880 | <sup>269</sup> (A) <b>PSAVPD</b> (A) <sup>276</sup>      | HexNAc <sub>2</sub> Hex <sub>2</sub> NeuAc <sub>2</sub>                    | [M-3H+Na] <sup>2-</sup> | 0.002           |
| 38  | 996.352 | <b>NGS</b>                                               | HexNAc <sub>5</sub> Hex <sub>6</sub> NeuAc <sub>2</sub> Fuc <sub>1</sub>   | [M-3H] <sup>3-</sup>    | 0.005           |
| 39  | 996.688 | <b>N</b>                                                 | HexNAc <sub>5</sub> Hex <sub>6</sub> NeuAc <sub>3</sub>                    | [M-3H] <sup>3-</sup>    | 0.001           |

|    |          |                                                   |                                                                            |                                       |       |
|----|----------|---------------------------------------------------|----------------------------------------------------------------------------|---------------------------------------|-------|
| 40 | 1004.020 | <b>N</b>                                          | HexNAc <sub>5</sub> Hex <sub>6</sub> NeuAc <sub>3</sub>                    | [M-4H+Na] <sup>3-</sup>               | 0.001 |
| 41 | 1009.688 | <b>LAN</b>                                        | HexNAc <sub>5</sub> Hex <sub>6</sub> NeuAc <sub>2</sub> Fuc <sub>1</sub>   | [M-3H] <sup>3-</sup>                  | 0.025 |
| 42 | 1015.695 | <sup>176</sup> NG <sup>177</sup>                  | HexNAc <sub>5</sub> Hex <sub>6</sub> NeuAc <sub>3</sub>                    | [M-3H] <sup>3-</sup>                  | 0.002 |
| 43 | 1019.04  | <sup>156</sup> NDSR <sup>159</sup>                | HexNAc <sub>5</sub> Hex <sub>6</sub> NeuAc <sub>2</sub>                    | [M-3H] <sup>3-</sup>                  | 0.005 |
| 44 | 1022.350 | <sup>99</sup> NC <sup>100</sup> ↔ <sup>89</sup> C | HexNAc <sub>5</sub> Hex <sub>6</sub> NeuAc <sub>2</sub> Fuc <sub>1</sub>   | [M-3H] <sup>3-</sup>                  | 0.005 |
| 45 | 1025.692 | <b>SN</b>                                         | HexNAc <sub>5</sub> Hex <sub>6</sub> NeuAc <sub>3</sub>                    | [M-3H] <sup>3-</sup>                  | 0.003 |
| 46 | 1035.026 | <b>ND</b>                                         | HexNAc <sub>5</sub> Hex <sub>6</sub> NeuAc <sub>3</sub>                    | [M-3H] <sup>3-</sup>                  | 0.001 |
| 47 | 1039.700 | <b>LN</b>                                         | HexNAc <sub>5</sub> Hex <sub>6</sub> NeuAc <sub>2</sub> NeuGc <sub>1</sub> | [M-3H] <sup>3-</sup>                  | 0.009 |
| 48 | 1041.682 | <b>NC</b>                                         | HexNAc <sub>5</sub> Hex <sub>6</sub> NeuAc <sub>2</sub> NeuGc <sub>1</sub> | [M-3H] <sup>3-</sup>                  | 0.002 |
| 49 | 1044.708 | <sup>176</sup> NGS <sup>178</sup>                 | HexNAc <sub>5</sub> Hex <sub>6</sub> NeuAc <sub>3</sub>                    | [M-3H] <sup>3-</sup>                  | 0.002 |
| 50 | 1050.034 | <b>NGS</b>                                        | HexNAc <sub>5</sub> Hex <sub>6</sub> NeuAc <sub>2</sub> NeuGc <sub>1</sub> | [M-3H] <sup>3-</sup>                  | 0.002 |
| 51 | 1052.035 | <sup>176</sup> NGS <sup>178</sup>                 | HexNAc <sub>5</sub> Hex <sub>6</sub> NeuAc <sub>3</sub>                    | [M-4H+Na] <sup>3-</sup>               | 0.002 |
| 52 | 1058.033 | <b>LAN</b>                                        | HexNAc <sub>5</sub> Hex <sub>6</sub> NeuAc <sub>3</sub>                    | [M-3H] <sup>3-</sup>                  | 0.025 |
| 53 | 1064.043 | <sup>156</sup> NDS <sup>158</sup>                 | HexNAc <sub>5</sub> Hex <sub>6</sub> NeuAc <sub>3</sub>                    | [M-3H] <sup>3-</sup>                  | 0.002 |
| 54 | 1070.693 | <sup>99</sup> NC <sup>100</sup> ↔ <sup>89</sup> C | HexNAc <sub>5</sub> Hex <sub>6</sub> NeuAc <sub>3</sub>                    | [M-3H] <sup>3-</sup>                  | 0.003 |
| 55 | 1076.019 | <sup>99</sup> NC <sup>100</sup> ↔ <sup>89</sup> C | HexNAc <sub>5</sub> Hex <sub>6</sub> NeuAc <sub>3</sub>                    | [M-4H+NH <sub>3</sub> ] <sup>3-</sup> | 0.011 |
| 56 | 1078.019 | <sup>99</sup> NC <sup>100</sup> ↔ <sup>89</sup> C | HexNAc <sub>5</sub> Hex <sub>6</sub> NeuAc <sub>3</sub>                    | [M-4H+Na] <sup>3-</sup>               | 0.003 |
| 57 | 1112.45  | <sup>278</sup> GPTPS <sup>282</sup>               | HexNAc <sub>1</sub> Hex <sub>1</sub> NeuAc <sub>1</sub>                    | [M-H] <sup>-</sup>                    | 0.002 |
| 58 | 1116.075 | <sup>156</sup> NDSR <sup>159</sup>                | HexNAc <sub>5</sub> Hex <sub>6</sub> NeuAc <sub>3</sub>                    | [M-3H] <sup>3-</sup>                  | 0.001 |
| 59 | 1121.401 | <sup>155</sup> LND <sup>157</sup>                 | HexNAc <sub>5</sub> Hex <sub>6</sub> NeuAc <sub>3</sub> Fuc <sub>1</sub>   | [M-3H] <sup>3-</sup>                  | 0.008 |
| 60 | 1123.402 | <sup>156</sup> NDSR <sup>159</sup>                | HexNAc <sub>5</sub> Hex <sub>6</sub> NeuAc <sub>3</sub>                    | [M-4H+Na] <sup>3-</sup>               | 0.002 |
| 61 | 1128.731 | <sup>155</sup> LND <sup>157</sup>                 | HexNAc <sub>5</sub> Hex <sub>6</sub> NeuAc <sub>3</sub> Fuc <sub>1</sub>   | [M-4H+Na] <sup>3-</sup>               | 0.008 |
| 62 | 1132.867 | <sup>99</sup> NC <sup>100</sup> ↔ <sup>89</sup> C | HexNAc <sub>4</sub> Hex <sub>5</sub> NeuAc <sub>1</sub>                    | [M-2H] <sup>2-</sup>                  | 0.008 |
| 63 | 1134.431 | <sup>278</sup> GPTPS <sup>282</sup>               | HexNAc <sub>1</sub> Hex <sub>1</sub> NeuAc <sub>1</sub>                    | [M-2H+Na] <sup>-</sup>                | 0.002 |
| 64 | 1141.739 | <sup>176</sup> NGS <sup>178</sup>                 | HexNAc <sub>5</sub> Hex <sub>6</sub> NeuAc <sub>4</sub>                    | [M-3H] <sup>3-</sup>                  | 0.001 |
| 65 | 1147.060 | <sup>176</sup> NGS <sup>178</sup>                 | HexNAc <sub>5</sub> Hex <sub>6</sub> NeuAc <sub>4</sub>                    | [M-4H+NH <sub>3</sub> ] <sup>3-</sup> | 0.018 |
| 66 | 1149.064 | <sup>176</sup> NGS <sup>178</sup>                 | HexNAc <sub>5</sub> Hex <sub>6</sub> NeuAc <sub>4</sub>                    | [M-4H+Na] <sup>3-</sup>               | 0.001 |
| 67 | 1154.401 | <sup>176</sup> NGS <sup>178</sup>                 | HexNAc <sub>5</sub> Hex <sub>6</sub> NeuAc <sub>4</sub>                    | [M-4H+K] <sup>3-</sup>                | 0.009 |
| 68 | 1161.072 | <sup>156</sup> NDS <sup>158</sup>                 | HexNAc <sub>5</sub> Hex <sub>6</sub> NeuAc <sub>4</sub>                    | [M-3H] <sup>3-</sup>                  | 0.003 |
| 69 | 1167.416 | <b>N</b>                                          | HexNAc <sub>4</sub> Hex <sub>5</sub> NeuAc <sub>2</sub>                    | [M-2H] <sup>2-</sup>                  | 0.004 |
| 70 | 1167.730 | <sup>99</sup> NC <sup>100</sup> ↔ <sup>89</sup> C | HexNAc <sub>5</sub> Hex <sub>6</sub> NeuAc <sub>4</sub>                    | [M-3H] <sup>3-</sup>                  | 0.001 |
| 71 | 1170.746 | <b>SNGS</b>                                       | HexNAc <sub>5</sub> Hex <sub>6</sub> NeuAc <sub>4</sub>                    | [M-3H] <sup>3-</sup>                  | 0.002 |
| 72 | 1195.924 | <b>NG</b>                                         | HexNAc <sub>4</sub> Hex <sub>5</sub> NeuAc <sub>2</sub>                    | [M-2H] <sup>2-</sup>                  | 0.000 |
| 73 | 1213.103 | <sup>156</sup> NDSR <sup>159</sup>                | HexNAc <sub>5</sub> Hex <sub>6</sub> NeuAc <sub>4</sub>                    | [M-3H] <sup>3-</sup>                  | 0.004 |
| 74 | 1224.934 | <sup>156</sup> ND <sup>157</sup>                  | HexNAc <sub>4</sub> Hex <sub>5</sub> NeuAc <sub>2</sub>                    | [M-2H] <sup>2-</sup>                  | 0.004 |
| 75 | 1268.446 | <sup>156</sup> NDS <sup>158</sup>                 | HexNAc <sub>4</sub> Hex <sub>5</sub> NeuAc <sub>2</sub>                    | [M-2H] <sup>2-</sup>                  | 0.001 |
| 76 | 1276.455 | <b>NDS</b>                                        | HexNAc <sub>4</sub> Hex <sub>5</sub> NeuAc <sub>1</sub> NeuGc <sub>1</sub> | [M-2H] <sup>2-</sup>                  | 0.015 |

|    |          |                                                   |                                                                          |                      |       |
|----|----------|---------------------------------------------------|--------------------------------------------------------------------------|----------------------|-------|
| 77 | 1278.423 | <sup>99</sup> NC <sup>100</sup> ↔ <sup>89</sup> C | HexNAc <sub>4</sub> Hex <sub>5</sub> NeuAc <sub>2</sub>                  | [M-2H] <sup>2-</sup> | 0.007 |
| 78 | 1305.455 | NDS                                               | HexNAc <sub>5</sub> Hex <sub>6</sub> NeuAc <sub>1</sub>                  | [M-2H] <sup>2-</sup> | 0.006 |
| 79 | 1315.441 | <sup>99</sup> NC <sup>100</sup> ↔ <sup>89</sup> C | HexNAc <sub>5</sub> Hex <sub>6</sub> NeuAc <sub>1</sub>                  | [M-2H] <sup>2-</sup> | 0.000 |
| 80 | 1346.493 | <sup>156</sup> NDSR <sup>159</sup>                | HexNAc <sub>4</sub> Hex <sub>5</sub> NeuAc <sub>2</sub>                  | [M-2H] <sup>2-</sup> | 0.004 |
| 81 | 1362.494 | <sup>156</sup> NDSR <sup>159</sup>                | HexNAc <sub>4</sub> Hex <sub>5</sub> NeuGc <sub>2</sub>                  | [M-2H] <sup>2-</sup> | 0.006 |
| 82 | 1422.004 | NGS                                               | HexNAc <sub>5</sub> Hex <sub>6</sub> NeuAc <sub>2</sub>                  | [M-2H] <sup>2-</sup> | 0.002 |
| 83 | 1451.009 | NDS                                               | HexNAc <sub>5</sub> Hex <sub>6</sub> NeuAc <sub>2</sub>                  | [M-2H] <sup>2-</sup> | 0.001 |
| 84 | 1460.985 | <sup>99</sup> NC <sup>100</sup> ↔ <sup>89</sup> C | HexNAc <sub>5</sub> Hex <sub>6</sub> NeuAc <sub>2</sub>                  | [M-2H] <sup>2-</sup> | 0.003 |
| 85 | 1529.052 | <sup>56</sup> NDSR <sup>159</sup>                 | HexNAc <sub>5</sub> Hex <sub>6</sub> NeuAc <sub>2</sub>                  | [M-2H] <sup>2-</sup> | 0.007 |
| 86 | 1567.563 | <sup>176</sup> NGS <sup>178</sup>                 | HexNAc <sub>5</sub> Hex <sub>6</sub> NeuAc <sub>3</sub>                  | [M-2H] <sup>2-</sup> | 0.005 |
| 87 | 1606.551 | <sup>99</sup> NC <sup>100</sup> ↔ <sup>89</sup> C | HexNAc <sub>5</sub> Hex <sub>6</sub> NeuAc <sub>3</sub>                  | [M-2H] <sup>2-</sup> | 0.006 |
| 88 | 1727.611 | -                                                 | HexNAc <sub>3</sub> Hex <sub>5</sub> NeuAc <sub>1</sub>                  | [M-H] <sup>-</sup>   | 0.001 |
| 89 | 1839.702 | <sup>277</sup> (A)GPTPS(A) <sup>282</sup>         | HexNAc <sub>2</sub> Hex <sub>2</sub> NeuAc <sub>2</sub>                  | [M-H] <sup>-</sup>   | 0.006 |
| 90 | 1889.662 | -                                                 | HexNAc <sub>3</sub> Hex <sub>6</sub> NeuAc <sub>1</sub>                  | [M-H] <sup>-</sup>   | 0.001 |
| 91 | 1930.693 | -                                                 | HexNAc <sub>4</sub> Hex <sub>5</sub> NeuAc <sub>1</sub>                  | [M-H] <sup>-</sup>   | 0.001 |
| 92 | 2043.733 | NDS                                               | HexNAc <sub>3</sub> Hex <sub>5</sub> NeuAc <sub>1</sub>                  | [M-H] <sup>-</sup>   | 0.023 |
| 93 | 2069.765 | LND                                               | HexNAc <sub>3</sub> Hex <sub>5</sub> NeuAc <sub>1</sub>                  | [M-H] <sup>-</sup>   | 0.003 |
| 94 | 2074.728 | AN                                                | HexNAc <sub>3</sub> Hex <sub>6</sub> NeuAc <sub>1</sub>                  | [M-H] <sup>-</sup>   | 0.014 |
| 95 | 2321.830 | ND                                                | HexNAc <sub>4</sub> Hex <sub>5</sub> NeuGc <sub>1</sub> Fuc <sub>1</sub> | [M-H] <sup>-</sup>   | 0.020 |
| 96 | 2434.889 | LND                                               | HexNAc <sub>4</sub> Hex <sub>5</sub> NeuGc <sub>1</sub> Fuc <sub>1</sub> | [M-H] <sup>-</sup>   | 0.002 |

<sup>a</sup> Parentheses are used to indicate ambiguous assignment of the terminal amino acid residues; residue in red are the glycosylation sites.

<sup>b</sup> Presence of disulfide bond indicated by ↔.

**Table S9.** Annotation of *N*-linked glycopeptides obtained from pronase digestion of human lactoferrin (Sequence P02788 and P02788-2 with consideration of variants).

| No | m/z      | Peptides | Glycan composition                                                       | Ion type             | $\Delta$ m/z |
|----|----------|----------|--------------------------------------------------------------------------|----------------------|--------------|
| 1  | 729.597  | N        | HexNAc <sub>4</sub> Hex <sub>5</sub> NeuAc <sub>1</sub> Fuc <sub>1</sub> | [M-3H] <sup>3-</sup> | 0.001        |
| 2  | 772.283  | NQ       | HexNAc <sub>4</sub> Hex <sub>5</sub> NeuAc <sub>1</sub> Fuc <sub>1</sub> | [M-3H] <sup>3-</sup> | 0.001        |
| 3  | 778.283  | N        | HexNAc <sub>4</sub> Hex <sub>5</sub> NeuAc <sub>1</sub> Fuc <sub>2</sub> | [M-3H] <sup>3-</sup> | 0.000        |
| 4  | 784.266  | YN       | HexNAc <sub>4</sub> Hex <sub>5</sub> Fuc <sub>3</sub>                    | [M-3H] <sup>3-</sup> | 0.025        |
| 5  | 791.623  | NW       | HexNAc <sub>4</sub> Hex <sub>5</sub> NeuAc <sub>1</sub> Fuc <sub>1</sub> | [M-3H] <sup>3-</sup> | 0.001        |
| 6  | 820.631  | NQ       | HexNAc <sub>4</sub> Hex <sub>5</sub> NeuAc <sub>2</sub>                  | [M-3H] <sup>3-</sup> | 0.002        |
| 7  | 826.631  | N        | HexNAc <sub>4</sub> Hex <sub>5</sub> NeuAc <sub>2</sub> Fuc <sub>1</sub> | [M-3H] <sup>3-</sup> | 0.003        |
| 8  | 832.642  | YN       | HexNAc <sub>4</sub> Hex <sub>5</sub> NeuAc <sub>1</sub> Fuc <sub>2</sub> | [M-3H] <sup>3-</sup> | 0.006        |
| 9  | 839.968  | NW       | HexNAc <sub>4</sub> Hex <sub>5</sub> NeuAc <sub>2</sub>                  | [M-3H] <sup>3-</sup> | 0.000        |
| 10 | 840.308  | NW       | HexNAc <sub>4</sub> Hex <sub>5</sub> NeuAc <sub>1</sub> Fuc <sub>2</sub> | [M-3H] <sup>3-</sup> | 0.000        |
| 11 | 869.307  | NQ       | HexNAc <sub>4</sub> Hex <sub>5</sub> NeuAc <sub>2</sub> Fuc <sub>1</sub> | [M-3H] <sup>3-</sup> | 0.006        |
| 12 | 874.646  | NGS      | HexNAc <sub>4</sub> Hex <sub>5</sub> NeuAc <sub>2</sub> Fuc <sub>1</sub> | [M-3H] <sup>3-</sup> | 0.000        |
| 13 | 881.325  | YN       | HexNAc <sub>4</sub> Hex <sub>5</sub> NeuAc <sub>1</sub> Fuc <sub>3</sub> | [M-3H] <sup>3-</sup> | 0.002        |
| 14 | 888.644  | NW       | HexNAc <sub>4</sub> Hex <sub>5</sub> NeuAc <sub>2</sub> Fuc <sub>1</sub> | [M-3H] <sup>3-</sup> | 0.011        |
| 15 | 899.993  | N        | HexNAc <sub>5</sub> Hex <sub>6</sub> NeuAc <sub>1</sub> Fuc <sub>2</sub> | [M-3H] <sup>3-</sup> | 0.000        |
| 16 | 903.331  | NGS      | HexNAc <sub>3</sub> Hex <sub>3</sub> NeuAc <sub>1</sub> Fuc <sub>1</sub> | [M-2H] <sup>2-</sup> | 0.002        |
| 17 | 940.348  | NQ       | HexNAc <sub>4</sub> Hex <sub>5</sub>                                     | [M-2H] <sup>2-</sup> | 0.001        |
| 18 | 948.679  | N        | HexNAc <sub>5</sub> Hex <sub>6</sub> NeuAc <sub>1</sub> Fuc <sub>4</sub> | [M-3H] <sup>3-</sup> | 0.000        |
| 19 | 976.349  | NQ       | HexNAc <sub>3</sub> Hex <sub>4</sub> NeuAc <sub>1</sub> Fuc <sub>1</sub> | [M-2H] <sup>2-</sup> | 0.008        |
| 20 | 984.357  | NS       | HexNAc <sub>4</sub> Hex <sub>4</sub> NeuAc <sub>1</sub>                  | [M-2H] <sup>2-</sup> | 0.002        |
| 21 | 997.032  | YNQ      | HexNAc <sub>5</sub> Hex <sub>6</sub> NeuAc <sub>1</sub> Fuc <sub>2</sub> | [M-3H] <sup>3-</sup> | 0.002        |
| 22 | 1004.860 | NQ       | HexNAc <sub>4</sub> Hex <sub>4</sub> NeuAc <sub>1</sub>                  | [M-2H] <sup>2-</sup> | 0.008        |
| 23 | 1013.377 | NQ       | HexNAc <sub>4</sub> Hex <sub>5</sub> Fuc <sub>1</sub>                    | [M-2H] <sup>2-</sup> | 0.000        |
| 24 | 1013.856 | N        | HexNAc <sub>4</sub> Hex <sub>4</sub> NeuAc <sub>1</sub> Fuc <sub>1</sub> | [M-2H] <sup>2-</sup> | 0.012        |
| 25 | 1021.864 | N        | HexNAc <sub>4</sub> Hex <sub>5</sub> NeuAc <sub>1</sub>                  | [M-2H] <sup>2-</sup> | 0.005        |
| 26 | 1022.372 | N        | HexNAc <sub>4</sub> Hex <sub>5</sub> Fuc <sub>2</sub>                    | [M-2H] <sup>2-</sup> | 0.004        |
| 27 | 1065.374 | NS       | HexNAc <sub>4</sub> Hex <sub>5</sub> NeuAc <sub>1</sub>                  | [M-2H] <sup>2-</sup> | 0.007        |
| 28 | 1077.897 | NQ       | HexNAc <sub>4</sub> Hex <sub>4</sub> NeuAc <sub>1</sub> Fuc <sub>1</sub> | [M-2H] <sup>2-</sup> | 0.000        |
| 29 | 1085.895 | NQ       | HexNAc <sub>4</sub> Hex <sub>5</sub> NeuAc <sub>1</sub>                  | [M-2H] <sup>2-</sup> | 0.000        |
| 30 | 1094.895 | N        | HexNAc <sub>4</sub> Hex <sub>5</sub> NeuAc <sub>1</sub> Fuc <sub>1</sub> | [M-2H] <sup>2-</sup> | 0.001        |
| 31 | 1103.915 | YN       | HexNAc <sub>4</sub> Hex <sub>5</sub> Fuc <sub>2</sub>                    | [M-2H] <sup>2-</sup> | 0.007        |
| 32 | 1106.891 | NW       | HexNAc <sub>4</sub> Hex <sub>4</sub> NeuAc <sub>1</sub> Fuc <sub>1</sub> | [M-2H] <sup>2-</sup> | 0.016        |
| 33 | 1128.407 | NQT      | HexNAc <sub>4</sub> Hex <sub>4</sub> NeuAc <sub>1</sub> Fuc <sub>1</sub> | [M-2H] <sup>2-</sup> | 0.013        |
| 34 | 1138.400 | NS       | HexNAc <sub>4</sub> Hex <sub>5</sub> NeuAc <sub>1</sub> Fuc              | [M-2H] <sup>2-</sup> | 0.010        |
| 35 | 1158.927 | NQ       | HexNAc <sub>4</sub> Hex <sub>5</sub> NeuAc <sub>1</sub> Fuc <sub>1</sub> | [M-2H] <sup>2-</sup> | 0.004        |
| 36 | 1167.926 | N        | HexNAc <sub>4</sub> Hex <sub>5</sub> NeuAc <sub>1</sub> Fuc <sub>2</sub> | [M-2H] <sup>2-</sup> | 0.008        |
| 37 | 1187.933 | NW       | HexNAc <sub>4</sub> Hex <sub>5</sub> NeuAc <sub>1</sub> Fuc <sub>1</sub> | [M-2H] <sup>2-</sup> | 0.001        |
| 38 | 1195.927 | NG       | HexNAc <sub>4</sub> Hex <sub>5</sub> NeuAc <sub>2</sub>                  | [M-2H] <sup>2-</sup> | 0.003        |
| 39 | 1209.441 | NQT      | HexNAc <sub>4</sub> Hex <sub>5</sub> NeuAc <sub>1</sub> Fuc <sub>1</sub> | [M-2H] <sup>2-</sup> | 0.006        |
| 40 | 1231.953 | NQ       | HexNAc <sub>4</sub> Hex <sub>5</sub> NeuAc <sub>1</sub> Fuc <sub>2</sub> | [M-2H] <sup>2-</sup> | 0.001        |
| 41 | 1240.446 | N        | HexNAc <sub>4</sub> Hex <sub>5</sub> NeuAc <sub>2</sub> Fuc <sub>1</sub> | [M-2H] <sup>2-</sup> | 0.004        |
| 42 | 1245.978 | RN       | HexNAc <sub>4</sub> Hex <sub>5</sub> NeuAc <sub>1</sub> Fuc <sub>2</sub> | [M-2H] <sup>2-</sup> | 0.004        |

|    |          |      |                                                                          |                         |       |
|----|----------|------|--------------------------------------------------------------------------|-------------------------|-------|
| 43 | 1251.43  | N    | HexNAc <sub>4</sub> Hex <sub>5</sub> NeuAc <sub>2</sub> Fuc <sub>1</sub> | [M-3H+Na] <sup>2-</sup> | 0.000 |
| 44 | 1260.96  | NW   | HexNAc <sub>4</sub> Hex <sub>5</sub> NeuAc <sub>1</sub> Fuc <sub>2</sub> | [M-2H] <sup>2-</sup>    | 0.008 |
| 45 | 1268.950 | NG   | HexNAc <sub>4</sub> Hex <sub>5</sub> NeuAc <sub>2</sub> Fuc <sub>1</sub> | [M-2H] <sup>2-</sup>    | 0.003 |
| 46 | 1282.463 | NQT  | HexNAc <sub>4</sub> Hex <sub>5</sub> NeuAc <sub>1</sub> Fuc <sub>2</sub> | [M-2H] <sup>2-</sup>    | 0.013 |
| 47 | 1304.464 | NQ   | HexNAc <sub>4</sub> Hex <sub>5</sub> NeuAc <sub>2</sub> Fuc <sub>1</sub> | [M-2H] <sup>2-</sup>    | 0.008 |
| 48 | 1312.459 | NGS  | HexNAc <sub>4</sub> Hex <sub>5</sub> NeuAc <sub>2</sub> Fuc <sub>1</sub> | [M-2H] <sup>2-</sup>    | 0.009 |
| 49 | 1333.473 | NW   | HexNAc <sub>4</sub> Hex <sub>5</sub> NeuAc <sub>2</sub> Fuc <sub>1</sub> | [M-2H] <sup>2-</sup>    | 0.009 |
| 50 | 1350.480 | N    | HexNAc <sub>5</sub> Hex <sub>6</sub> NeuAc <sub>1</sub> Fuc <sub>2</sub> | [M-2H] <sup>2-</sup>    | 0.009 |
| 51 | 1370.485 | NGSD | HexNAc <sub>4</sub> Hex <sub>5</sub> NeuAc <sub>1</sub> Fuc <sub>3</sub> | [M-2H] <sup>2-</sup>    | 0.007 |
| 52 | 1414.505 | NQ   | HexNAc <sub>5</sub> Hex <sub>6</sub> NeuAc <sub>1</sub> Fuc <sub>2</sub> | [M-2H] <sup>2-</sup>    | 0.014 |
| 53 | 1422.507 | NGS  | HexNAc <sub>5</sub> Hex <sub>6</sub> NeuAc <sub>1</sub> Fuc <sub>2</sub> | [M-2H] <sup>2-</sup>    | 0.009 |
| 54 | 1423.511 | N    | HexNAc <sub>5</sub> Hex <sub>6</sub> NeuAc <sub>1</sub> Fuc <sub>3</sub> | [M-2H] <sup>2-</sup>    | 0.008 |
| 55 | 1443.517 | NW   | HexNAc <sub>5</sub> Hex <sub>6</sub> NeuAc <sub>1</sub> Fuc <sub>2</sub> | [M-2H] <sup>2-</sup>    | 0.012 |
| 56 | 1487.534 | NQ   | HexNAc <sub>5</sub> Hex <sub>6</sub> NeuAc <sub>1</sub> Fuc <sub>3</sub> | [M-2H] <sup>2-</sup>    | 0.014 |
| 57 | 1495.533 | NGS  | HexNAc <sub>5</sub> Hex <sub>6</sub> NeuAc <sub>1</sub> Fuc <sub>3</sub> | [M-2H] <sup>2-</sup>    | 0.012 |
| 58 | 1516.539 | NW   | HexNAc <sub>5</sub> Hex <sub>6</sub> NeuAc <sub>1</sub> Fuc <sub>3</sub> | [M-2H] <sup>2-</sup>    | 0.020 |
| 59 | 2190.772 | N    | HexNAc <sub>4</sub> Hex <sub>5</sub> NeuAc <sub>1</sub> Fuc <sub>1</sub> | [M-H] <sup>-</sup>      | 0.017 |
| 60 | 2318.830 | NQ   | HexNAc <sub>4</sub> Hex <sub>5</sub> NeuAc <sub>1</sub> Fuc <sub>1</sub> | [M-H] <sup>-</sup>      | 0.017 |
| 61 | 2336.825 | N    | HexNAc <sub>4</sub> Hex <sub>5</sub> NeuAc <sub>1</sub> Fuc <sub>2</sub> | [M-H] <sup>-</sup>      | 0.022 |



**Table S10.** Annotation of *N*-linked glycopeptides obtained from pronase digestion of bovine AGP.

| No | m/z      | Peptides | Glycan composition                                                       | Ion type             | $\Delta$ m/z |
|----|----------|----------|--------------------------------------------------------------------------|----------------------|--------------|
| 1  | 1072.383 | TN       | HexNAc <sub>4</sub> Hex <sub>5</sub> NeuAc <sub>1</sub>                  | [M-2H] <sup>2-</sup> | 0.006        |
| 2  | 1080.381 | TN       | HexNAc <sub>4</sub> Hex <sub>5</sub> NeuGc <sub>1</sub>                  | [M-2H] <sup>2-</sup> | 0.005        |
| 3  | 1085.896 | QN       | HexNAc <sub>4</sub> Hex <sub>5</sub> NeuAc <sub>1</sub>                  | [M-2H] <sup>2-</sup> | 0.002        |
| 4  | 1093.902 | NK       | HexNAc <sub>4</sub> Hex <sub>5</sub> NeuGc <sub>1</sub>                  | [M-2H] <sup>2-</sup> | 0.008        |
| 5  | 1100.895 | NGT      | HexNAc <sub>4</sub> Hex <sub>5</sub> NeuAc <sub>1</sub>                  | [M-2H] <sup>2-</sup> | 0.005        |
| 6  | 1108.892 | NGT      | HexNAc <sub>4</sub> Hex <sub>5</sub> NeuGc <sub>1</sub>                  | [M-2H] <sup>2-</sup> | 0.005        |
| 7  | 1110.389 | -        | HexNAc <sub>4</sub> Hex <sub>5</sub> NeuAc <sub>2</sub>                  | [M-2H] <sup>2-</sup> | 0.002        |
| 8  | 1118.384 | -        | HexNAc <sub>4</sub> Hex <sub>5</sub> NeuGc <sub>2</sub>                  | [M-2H] <sup>2-</sup> | 0.005        |
| 9  | 1129.421 | NKS      | HexNAc <sub>4</sub> Hex <sub>5</sub> NeuAc <sub>1</sub>                  | [M-2H] <sup>2-</sup> | 0.007        |
| 10 | 1137.421 | NKS      | HexNAc <sub>4</sub> Hex <sub>5</sub> NeuGc <sub>1</sub>                  | [M-2H] <sup>2-</sup> | 0.006        |
| 11 | 1156.411 | PNAT     | HexNAc <sub>4</sub> Hex <sub>5</sub> NeuAc <sub>1</sub>                  | [M-2H] <sup>2-</sup> | 0.025        |
| 12 | 1164.409 | PNAT     | HexNAc <sub>4</sub> Hex <sub>5</sub> NeuGc <sub>1</sub>                  | [M-2H] <sup>2-</sup> | 0.029        |
| 13 | 1172.932 | QNGT     | HexNAc <sub>4</sub> Hex <sub>5</sub> NeuGc <sub>1</sub>                  | [M-2H] <sup>2-</sup> | 0.000        |
| 14 | 1184.386 | YN       | HexNAc <sub>4</sub> Hex <sub>5</sub> Fuc <sub>1</sub> NeuGc <sub>1</sub> | [M-2H] <sup>2-</sup> | 0.039        |
| 15 | 1217.931 | TN       | HexNAc <sub>4</sub> Hex <sub>5</sub> NeuAc <sub>2</sub>                  | [M-2H] <sup>2-</sup> | 0.006        |
| 16 | 1225.928 | TN       | HexNAc <sub>4</sub> Hex <sub>5</sub> NeuAc <sub>1</sub> Gc <sub>1</sub>  | [M-2H] <sup>2-</sup> | 0.011        |
| 17 | 1231.446 | QN       | HexNAc <sub>4</sub> Hex <sub>5</sub> NeuAc <sub>2</sub>                  | [M-2H] <sup>2-</sup> | 0.000        |
| 18 | 1233.931 | TN       | HexNAc <sub>4</sub> Hex <sub>5</sub> NeuGc <sub>2</sub>                  | [M-2H] <sup>2-</sup> | 0.005        |
| 19 | 1239.449 | QN       | HexNAc <sub>4</sub> Hex <sub>5</sub> NeuAc <sub>1</sub> Gc <sub>1</sub>  | [M-2H] <sup>2-</sup> | 0.004        |
| 20 | 1246.449 | NGT      | HexNAc <sub>4</sub> Hex <sub>5</sub> NeuAc <sub>2</sub>                  | [M-2H] <sup>2-</sup> | 0.003        |
| 21 | 1247.453 | QN       | HexNAc <sub>4</sub> Hex <sub>5</sub> NeuGc <sub>2</sub>                  | [M-2H] <sup>2-</sup> | 0.011        |
| 22 | 1254.439 | NGT      | HexNAc <sub>4</sub> Hex <sub>5</sub> NeuAc <sub>1</sub> Gc <sub>1</sub>  | [M-2H] <sup>2-</sup> | 0.010        |
| 23 | 1262.438 | NCS      | HexNAc <sub>4</sub> Hex <sub>5</sub> NeuAc <sub>2</sub>                  | [M-2H] <sup>2-</sup> | 0.002        |
| 24 | 1268.454 | WN       | HexNAc <sub>4</sub> Hex <sub>5</sub> NeuAc <sub>1</sub> Gc <sub>1</sub>  | [M-2H] <sup>2-</sup> | 0.000        |
| 25 | 1274.972 | NKS      | HexNAc <sub>4</sub> Hex <sub>5</sub> NeuAc <sub>2</sub>                  | [M-2H] <sup>2-</sup> | 0.001        |
| 26 | 1276.469 | QN       | HexNAc <sub>5</sub> Hex <sub>6</sub> NeuAc <sub>1</sub>                  | [M-2H] <sup>2-</sup> | 0.006        |
| 27 | 1282.970 | NKS      | HexNAc <sub>4</sub> Hex <sub>5</sub> NeuAc <sub>1</sub> Gc <sub>1</sub>  | [M-2H] <sup>2-</sup> | 0.009        |
| 28 | 1290.970 | NKS      | HexNAc <sub>4</sub> Hex <sub>5</sub> NeuGc <sub>2</sub>                  | [M-2H] <sup>2-</sup> | 0.007        |
| 29 | 1301.964 | PNAT     | HexNAc <sub>4</sub> Hex <sub>5</sub> NeuAc <sub>2</sub>                  | [M-2H] <sup>2-</sup> | 0.022        |
| 30 | 1309.957 | PNAT     | HexNAc <sub>4</sub> Hex <sub>5</sub> NeuAc <sub>1</sub> Gc <sub>1</sub>  | [M-2H] <sup>2-</sup> | 0.028        |
| 31 | 1312.973 | N        | HexNAc <sub>4</sub> Hex <sub>5</sub> NeuAc <sub>3</sub>                  | [M-2H] <sup>2-</sup> | 0.009        |
| 32 | 1317.956 | PNAT     | HexNAc <sub>4</sub> Hex <sub>5</sub> NeuGc <sub>2</sub>                  | [M-2H] <sup>2-</sup> | 0.026        |
| 33 | 1320.962 | N        | HexNAc <sub>4</sub> Hex <sub>5</sub> NeuAc <sub>2</sub> Gc <sub>1</sub>  | [M-2H] <sup>2-</sup> | 0.000        |
| 34 | 1326.483 | QNGT     | HexNAc <sub>4</sub> Hex <sub>5</sub> NeuGc <sub>2</sub>                  | [M-2H] <sup>2-</sup> | 0.005        |
| 35 | 1329.451 | EYN      | HexNAc <sub>4</sub> Hex <sub>5</sub> NeuGc <sub>2</sub>                  | [M-2H] <sup>2-</sup> | 0.015        |
| 36 | 1355.492 | WNGT     | HexNAc <sub>4</sub> Hex <sub>5</sub> NeuGc <sub>2</sub>                  | [M-2H] <sup>2-</sup> | 0.004        |
| 37 | 1363.482 | TN       | HexNAc <sub>4</sub> Hex <sub>5</sub> NeuAc <sub>3</sub>                  | [M-2H] <sup>2-</sup> | 0.007        |
| 38 | 1371.479 | TN       | HexNAc <sub>4</sub> Hex <sub>5</sub> NeuAc <sub>2</sub> Gc <sub>1</sub>  | [M-2H] <sup>2-</sup> | 0.008        |
| 39 | 1377.006 | NK       | HexNAc <sub>4</sub> Hex <sub>5</sub> NeuAc <sub>3</sub>                  | [M-2H] <sup>2-</sup> | 0.008        |
| 40 | 1379.477 | TN       | HexNAc <sub>4</sub> Hex <sub>5</sub> NeuAc <sub>1</sub> Gc <sub>2</sub>  | [M-2H] <sup>2-</sup> | 0.007        |
| 41 | 1385.005 | NK       | HexNAc <sub>4</sub> Hex <sub>5</sub> NeuAc <sub>2</sub> Gc <sub>1</sub>  | [M-2H] <sup>2-</sup> | 0.006        |
| 42 | 1881.718 | QN       | HexNAc <sub>4</sub> Hex <sub>5</sub>                                     | [M-H] <sup>-</sup>   | 0.016        |
| 43 | 1911.705 | NGT      | HexNAc <sub>4</sub> Hex <sub>5</sub>                                     | [M-H] <sup>-</sup>   | 0.007        |

|    |          |      |                                                                          |                    |       |
|----|----------|------|--------------------------------------------------------------------------|--------------------|-------|
| 44 | 2016.718 | NCSF | HexNAc <sub>3</sub> Hex <sub>4</sub> NeuAc <sub>1</sub>                  | [M-H] <sup>-</sup> | 0.000 |
| 45 | 2022.718 | PNAT | HexNAc <sub>4</sub> Hex <sub>5</sub>                                     | [M-H] <sup>-</sup> | 0.065 |
| 46 | 2056.691 | NATM | HexNAc <sub>4</sub> Hex <sub>5</sub>                                     | [M-H] <sup>-</sup> | 0.079 |
| 47 | 2032.710 | YNCS | HexNAc <sub>3</sub> Hex <sub>4</sub> NeuAc <sub>1</sub>                  | [M-H] <sup>-</sup> | 0.003 |
| 48 | 2048.711 | YNCS | HexNAc <sub>3</sub> Hex <sub>4</sub> NeuGc <sub>1</sub>                  | [M-H] <sup>-</sup> | 0.003 |
| 49 | 2067.744 | PNA  | HexNAc <sub>4</sub> Hex <sub>5</sub> Fuc <sub>1</sub>                    | [M-H] <sup>-</sup> | 0.049 |
| 50 | 2085.738 | WN   | HexNAc <sub>4</sub> Hex <sub>5</sub> Fuc <sub>1</sub>                    | [M-H] <sup>-</sup> | 0.042 |
| 51 | 2092.737 | -    | HexNAc <sub>4</sub> Hex <sub>5</sub> Fuc <sub>1</sub> NeuAc <sub>1</sub> | [M-H] <sup>-</sup> | 0.003 |
| 52 | 2172.773 | QN   | HexNAc <sub>4</sub> Hex <sub>5</sub> NeuAc <sub>1</sub>                  | [M-H] <sup>-</sup> | 0.016 |

**Table S11** Annotation of *N*- and *O*-linked glycopeptides obtained from pronase digestion of SARS-CoV-2 RBD.

| No | m/z      | Peptides | Glycan composition                                                                      | Ion type             | $\Delta$ m/z |
|----|----------|----------|-----------------------------------------------------------------------------------------|----------------------|--------------|
| 1  | 826.624  | N        | HexNAc <sub>4</sub> Hex <sub>5</sub> Fuc <sub>1</sub> NeuAc <sub>2</sub>                | [M-3H] <sup>3-</sup> | 0.004        |
| 2  | 850.297  | NA       | HexNAc <sub>4</sub> Hex <sub>5</sub> Fuc <sub>1</sub> NeuAc <sub>2</sub>                | [M-3H] <sup>3-</sup> | 0.010        |
| 3  | 907.991  | FPN      | HexNAc <sub>4</sub> Hex <sub>5</sub> Fuc <sub>1</sub> NeuAc <sub>2</sub>                | [M-3H] <sup>3-</sup> | 0.011        |
| 4  | 948.334  | N        | HexNAc <sub>5</sub> Hex <sub>6</sub> Fuc <sub>1</sub> NeuAc <sub>2</sub>                | [M-3H] <sup>3-</sup> | 0.005        |
| 5  | 962.004  | N        | HexNAc <sub>6</sub> Hex <sub>5</sub> Fuc <sub>1</sub> NeuAc <sub>2</sub>                | [M-3H] <sup>3-</sup> | 0.011        |
| 6  | 969.853  | FPN      | HexNAc <sub>3</sub> Hex <sub>5</sub> Fuc <sub>1</sub>                                   | [M-2H] <sup>2-</sup> | 0.014        |
| 7  | 972.011  | NA       | HexNAc <sub>5</sub> Hex <sub>6</sub> Fuc <sub>1</sub> NeuAc <sub>2</sub>                | [M-3H] <sup>3-</sup> | 0.007        |
| 8  | 975.321  | PNI      | HexNAc <sub>4</sub> Hex <sub>4</sub> Fuc <sub>1</sub>                                   | [M-2H] <sup>2-</sup> | 0.065        |
| 9  | 976.860  | NA       | HexNAc <sub>4</sub> Hex <sub>4</sub> Fuc <sub>2</sub>                                   | [M-2H] <sup>2-</sup> | 0.008        |
| 10 | 981.358  | FPN      | HexNAc <sub>5</sub> Hex <sub>6</sub> Fuc <sub>2</sub> NeuAc <sub>1</sub>                | [M-3H] <sup>3-</sup> | 0.008        |
| 11 | 984.858  | NA       | HexNAc <sub>4</sub> Hex <sub>5</sub> Fuc <sub>1</sub>                                   | [M-2H] <sup>2-</sup> | 0.007        |
| 12 | 997.018  | N        | HexNAc <sub>5</sub> Hex <sub>6</sub> Fuc <sub>2</sub> NeuAc <sub>2</sub>                | [M-3H] <sup>3-</sup> | 0.006        |
| 13 | 1005.371 | NA       | HexNAc <sub>5</sub> Hex <sub>4</sub> Fuc <sub>1</sub>                                   | [M-2H] <sup>2-</sup> | 0.007        |
| 14 | 1013.859 | N        | HexNAc <sub>4</sub> Hex <sub>4</sub> Fuc <sub>1</sub> NeuAc <sub>1</sub>                | [M-2H] <sup>2-</sup> | 0.009        |
| 15 | 1020.698 | NA       | HexNAc <sub>5</sub> Hex <sub>6</sub> Fuc <sub>2</sub> NeuAc <sub>2</sub>                | [M-3H] <sup>3-</sup> | 0.006        |
| 16 | 1022.368 | N        | HexNAc <sub>5</sub> Hex <sub>4</sub> Fuc <sub>2</sub>                                   | [M-2H] <sup>2-</sup> | 0.007        |
| 17 | 1029.707 | FPN      | HexNAc <sub>5</sub> Hex <sub>6</sub> Fuc <sub>1</sub> NeuAc <sub>2</sub>                | [M-3H] <sup>3-</sup> | 0.006        |
| 18 | 1034.374 | FPN      | HexNAc <sub>3</sub> Hex <sub>4</sub> Fuc <sub>1</sub> NeuAc <sub>1</sub>                | [M-2H] <sup>2-</sup> | 0.014        |
| 19 | 1042.884 | FPN      | HexNAc <sub>3</sub> Hex <sub>5</sub> Fuc <sub>2</sub>                                   | [M-2H] <sup>2-</sup> | 0.013        |
| 20 | 1045.365 | N        | HexNAc <sub>5</sub> Hex <sub>6</sub> Fuc <sub>1</sub> NeuAc <sub>3</sub>                | [M-3H] <sup>3-</sup> | 0.005        |
| 21 | 1049.377 | NA       | HexNAc <sub>4</sub> Hex <sub>4</sub> Fuc <sub>1</sub> NeuAc <sub>1</sub>                | [M-2H] <sup>2-</sup> | 0.010        |
| 22 | 1057.888 | NA       | HexNAc <sub>5</sub> Hex <sub>4</sub> Fuc <sub>2</sub>                                   | [M-2H] <sup>2-</sup> | 0.006        |
| 23 | 1063.396 | FPN      | HexNAc <sub>4</sub> Hex <sub>4</sub> Fuc <sub>2</sub>                                   | [M-2H] <sup>2-</sup> | 0.014        |
| 24 | 1069.042 | NA       | HexNAc <sub>5</sub> Hex <sub>6</sub> Fuc <sub>1</sub> NeuAc <sub>3</sub>                | [M-3H] <sup>3-</sup> | 0.008        |
| 25 | 1078.397 | NA       | HexNAc <sub>4</sub> Hex <sub>5</sub> NeuAc <sub>1</sub> Ac <sub>1</sub>                 | [M-2H] <sup>2-</sup> | 0.008        |
| 26 | 1086.397 | NA       | HexNAc <sub>5</sub> Hex <sub>5</sub> Fuc <sub>1</sub>                                   | [M-2H] <sup>2-</sup> | 0.008        |
| 27 | 1094.887 | N        | HexNAc <sub>4</sub> Hex <sub>5</sub> Fuc <sub>1</sub> NeuAc <sub>1</sub>                | [M-2H] <sup>2-</sup> | 0.008        |
| 28 | 1115.401 | N        | HexNAc <sub>5</sub> Hex <sub>4</sub> Fuc <sub>1</sub> NeuAc <sub>1</sub>                | [M-2H] <sup>2-</sup> | 0.005        |
| 29 | 1130.405 | NA       | HexNAc <sub>4</sub> Hex <sub>5</sub> Fuc <sub>1</sub> NeuAc <sub>1</sub>                | [M-2H] <sup>2-</sup> | 0.008        |
| 30 | 1135.919 | N        | HexNAc <sub>6</sub> Hex <sub>3</sub> Fuc <sub>1</sub> NeuAc <sub>1</sub>                | [M-2H] <sup>2-</sup> | 0.002        |
| 31 | 1143.414 | PN       | HexNAc <sub>4</sub> Hex <sub>5</sub> Fuc <sub>1</sub> NeuAc <sub>1</sub>                | [M-2H] <sup>2-</sup> | 0.007        |
| 32 | 1150.914 | NA       | HexNAc <sub>5</sub> Hex <sub>4</sub> Fuc <sub>1</sub> NeuAc <sub>1</sub>                | [M-2H] <sup>2-</sup> | 0.001        |
| 33 | 1155.381 | N        | HexNAc <sub>5</sub> Hex <sub>4</sub> Fuc <sub>1</sub> NeuAc <sub>1</sub> S <sub>1</sub> | [M-2H] <sup>2-</sup> | 0.005        |
| 34 | 1164.942 | FPN      | HexNAc <sub>4</sub> Hex <sub>5</sub> NeuAc <sub>1</sub> Ac <sub>1</sub>                 | [M-2H] <sup>2-</sup> | 0.011        |
| 35 | 1167.915 | N        | HexNAc <sub>4</sub> Hex <sub>5</sub> Fuc <sub>2</sub> NeuAc <sub>1</sub>                | [M-2H] <sup>2-</sup> | 0.008        |
| 36 | 1188.427 | N        | HexNAc <sub>4</sub> Hex <sub>5</sub> NeuAc <sub>1</sub> Ac <sub>1</sub>                 | [M-2H] <sup>2-</sup> | 0.001        |
| 37 | 1194.430 | NITN     | HexNAc <sub>6</sub> Hex <sub>3</sub> Fuc <sub>1</sub> S <sub>1</sub>                    | [M-2H] <sup>2-</sup> | 0.009        |
| 38 | 1196.423 | N        | HexNAc <sub>5</sub> Hex <sub>5</sub> Fuc <sub>1</sub> NeuAc <sub>1</sub>                | [M-2H] <sup>2-</sup> | 0.011        |
| 39 | 1203.434 | NA       | HexNAc <sub>4</sub> Hex <sub>5</sub> Fuc <sub>2</sub> NeuAc <sub>1</sub>                | [M-2H] <sup>2-</sup> | 0.007        |
| 40 | 1216.950 | FPN      | HexNAc <sub>4</sub> Hex <sub>5</sub> Fuc <sub>1</sub> NeuAc <sub>1</sub>                | [M-2H] <sup>2-</sup> | 0.005        |
| 41 | 1223.945 | NI       | HexNAc <sub>4</sub> Hex <sub>5</sub> NeuAc <sub>2</sub>                                 | [M-2H] <sup>2-</sup> | 0.010        |
| 42 | 1231.947 | NA       | HexNAc <sub>5</sub> Hex <sub>5</sub> Fuc <sub>1</sub> NeuAc <sub>1</sub>                | [M-2H] <sup>2-</sup> | 0.006        |

|    |          |     |                                                                          |                      |       |
|----|----------|-----|--------------------------------------------------------------------------|----------------------|-------|
| 43 | 1237.461 | FPN | HexNAc <sub>5</sub> Hex <sub>4</sub> Fuc <sub>1</sub> NeuAc <sub>1</sub> | [M-2H] <sup>2-</sup> | 0.003 |
| 44 | 1240.441 | N   | HexNAc <sub>4</sub> Hex <sub>5</sub> Fuc <sub>1</sub> NeuAc <sub>2</sub> | [M-2H] <sup>2-</sup> | 0.001 |
| 45 | 1257.969 | FPN | HexNAc <sub>6</sub> Hex <sub>3</sub> Fuc <sub>1</sub> NeuAc <sub>1</sub> | [M-2H] <sup>2-</sup> | 0.012 |
| 46 | 1260.940 | N   | HexNAc <sub>5</sub> Hex <sub>4</sub> Fuc <sub>1</sub> NeuAc <sub>2</sub> | [M-2H] <sup>2-</sup> | 0.015 |
| 47 | 1275.953 | NA  | HexNAc <sub>4</sub> Hex <sub>5</sub> Fuc <sub>1</sub> NeuAc <sub>2</sub> | [M-2H] <sup>2-</sup> | 0.007 |
| 48 | 1277.456 | N   | HexNAc <sub>5</sub> Hex <sub>6</sub> Fuc <sub>1</sub> NeuAc <sub>1</sub> | [M-2H] <sup>2-</sup> | 0.005 |
| 49 | 1289.974 | FPN | HexNAc <sub>4</sub> Hex <sub>5</sub> Fuc <sub>2</sub> NeuAc <sub>1</sub> | [M-2H] <sup>2-</sup> | 0.010 |
| 50 | 1310.484 | FPN | HexNAc <sub>4</sub> Hex <sub>5</sub> NeuAc <sub>1</sub> Ac <sub>1</sub>  | [M-2H] <sup>2-</sup> | 0.003 |
| 51 | 1312.973 | NA  | HexNAc <sub>5</sub> Hex <sub>6</sub> Fuc <sub>1</sub> NeuAc <sub>1</sub> | [M-2H] <sup>2-</sup> | 0.006 |
| 52 | 1318.487 | FPN | HexNAc <sub>5</sub> Hex <sub>5</sub> Fuc <sub>1</sub> NeuAc <sub>1</sub> | [M-2H] <sup>2-</sup> | 0.008 |
| 53 | 1350.483 | N   | HexNAc <sub>5</sub> Hex <sub>6</sub> Fuc <sub>2</sub> NeuAc <sub>1</sub> | [M-2H] <sup>2-</sup> | 0.006 |
| 54 | 1362.494 | FPN | HexNAc <sub>4</sub> Hex <sub>5</sub> Fuc <sub>1</sub> NeuAc <sub>2</sub> | [M-2H] <sup>2-</sup> | 0.008 |
| 55 | 1383.002 | FPN | HexNAc <sub>5</sub> Hex <sub>4</sub> Fuc <sub>1</sub> NeuAc <sub>2</sub> | [M-2H] <sup>2-</sup> | 0.014 |
| 56 | 1385.995 | NA  | HexNAc <sub>5</sub> Hex <sub>6</sub> Fuc <sub>2</sub> NeuAc <sub>1</sub> | [M-2H] <sup>2-</sup> | 0.013 |
| 57 | 1391.508 | FPN | HexNAc <sub>5</sub> Hex <sub>5</sub> Fuc <sub>2</sub> NeuAc <sub>1</sub> | [M-2H] <sup>2-</sup> | 0.016 |
| 58 | 1399.514 | FPN | HexNAc <sub>5</sub> Hex <sub>6</sub> Fuc <sub>1</sub> NeuAc <sub>1</sub> | [M-2H] <sup>2-</sup> | 0.007 |
| 59 | 1418.506 | NA  | HexNAc <sub>2</sub> Hex <sub>5</sub>                                     | [M-H] <sup>-</sup>   | 0.007 |
| 60 | 1423.002 | N   | HexNAc <sub>5</sub> Hex <sub>6</sub> Fuc <sub>1</sub> NeuAc <sub>2</sub> | [M-2H] <sup>2-</sup> | 0.006 |
| 61 | 1458.514 | NA  | HexNAc <sub>5</sub> Hex <sub>6</sub> Fuc <sub>1</sub> NeuAc <sub>2</sub> | [M-2H] <sup>2-</sup> | 0.013 |
| 62 | 1472.540 | FPN | HexNAc <sub>5</sub> Hex <sub>6</sub> Fuc <sub>2</sub> NeuAc <sub>1</sub> | [M-2H] <sup>2-</sup> | 0.010 |
| 63 | 1545.055 | FPN | HexNAc <sub>5</sub> Hex <sub>6</sub> Fuc <sub>1</sub> NeuAc <sub>2</sub> | [M-2H] <sup>2-</sup> | 0.014 |
| 64 | 1545.560 | ES  | HexNAc <sub>2</sub> Hex <sub>2</sub> NeuAc <sub>2</sub>                  | [M-H] <sup>-</sup>   | 0.019 |
| 65 | 1646.607 | TES | HexNAc <sub>2</sub> Hex <sub>2</sub> NeuAc <sub>2</sub>                  | [M-H] <sup>-</sup>   | 0.019 |

**Table S12.** Affinities ( $K_d$ ,  $\mu\text{M}$ ) measured by COIN-CaR-nMS screening of *N*-glycan (native and NeuS-treated) natural libraries and 6SL (**G21**) and 6SLN (**G23**) against to SNA. Measurements were performed on ammonium acetate solutions (200 mM, pH 6.9).<sup>a,b</sup>

| Order # | Glycan composition                                                                          | Native library | NeuS-treated library |
|---------|---------------------------------------------------------------------------------------------|----------------|----------------------|
| 1       | HexNAc <sub>3</sub> Hex <sub>4</sub> Fuc <sub>1</sub> NeuAc <sub>1</sub>                    | 0.13 ± 0.05    | 0.17 ± 0.04          |
| 2       | HexNAc <sub>4</sub> Hex <sub>4</sub> NeuAc <sub>1</sub>                                     | 0.14 ± 0.05    | 0.20 ± 0.07          |
| 3       | HexNAc <sub>4</sub> Hex <sub>4</sub> Fuc <sub>1</sub> NeuAc <sub>1</sub>                    | 0.14 ± 0.04    | 0.30 ± 0.05          |
| 4       | HexNAc <sub>3</sub> Hex <sub>4</sub> NeuAc <sub>1</sub>                                     | 0.15 ± 0.05    | 0.40 ± 0.14          |
| 5       | HexNAc <sub>3</sub> Hex <sub>4</sub> NeuGc <sub>1</sub>                                     | 0.15 ± 0.06    | 0.32 ± 0.10          |
| 6       | HexNAc <sub>3</sub> Hex <sub>5</sub> Fuc <sub>1</sub> NeuAc <sub>1</sub>                    | 0.16 ± 0.04    | 0.20 ± 0.05          |
| 7       | HexNAc <sub>4</sub> Hex <sub>5</sub> NeuAc <sub>1</sub>                                     | 0.20 ± 0.05    | 0.20 ± 0.07          |
| 8       | HexNAc <sub>4</sub> Hex <sub>5</sub> Fuc <sub>1</sub> NeuAc <sub>1</sub>                    | 0.20 ± 0.07    | 0.30 ± 0.03          |
| 9       | HexNAc <sub>4</sub> Hex <sub>5</sub> Fuc <sub>2</sub> NeuAc <sub>1</sub>                    | 0.20 ± 0.07    | 0.30 ± 0.02          |
| 10      | HexNAc <sub>5</sub> Hex <sub>3</sub> Fuc <sub>1</sub> NeuAc <sub>1</sub>                    | 0.20 ± 0.04    | 0.20 ± 0.04          |
| 11      | HexNAc <sub>6</sub> Hex <sub>3</sub> Fuc <sub>2</sub> NeuAc <sub>1</sub>                    | 0.20 ± 0.01    | 0.20 ± 0.01          |
| 12      | HexNAc <sub>4</sub> Hex <sub>5</sub> NeuGc <sub>1</sub>                                     | 0.40 ± 0.07    | 0.30 ± 0.03          |
| 13      | HexNAc <sub>4</sub> Hex <sub>5</sub> Fuc <sub>1</sub> NeuGc <sub>1</sub>                    | 0.41 ± 0.15    | 0.50 ± 0.17          |
| 14      | HexNAc <sub>5</sub> Hex <sub>4</sub> Fuc <sub>1</sub> NeuAc <sub>1</sub>                    | 0.50 ± 0.15    | 0.50 ± 0.04          |
| 15      | $\alpha$ -D-Neu5Ac-(2→6)- $\beta$ -D-Gal-(1→4)-D-GlcNAc                                     | 0.55 ± 0.16    | -                    |
| 16      | HexNAc <sub>5</sub> Hex <sub>6</sub> NeuAc <sub>1</sub>                                     | 0.65 ± 0.14    | 0.57 ± 0.14          |
| 17      | HexNAc <sub>4</sub> Hex <sub>5</sub> NeuAc <sub>1</sub> NeuGc <sub>1</sub>                  | 0.82 ± 0.07    | 1.20 ± 0.20          |
| 18      | HexNAc <sub>5</sub> Hex <sub>6</sub> NeuGc <sub>1</sub>                                     | 0.82 ± 0.21    | 0.40 ± 0.11          |
| 19      | HexNAc <sub>4</sub> Hex <sub>5</sub> NeuGc <sub>2</sub>                                     | 0.86 ± 0.22    | 1.40 ± 0.28          |
| 20      | HexNAc <sub>5</sub> Hex <sub>6</sub> Fuc <sub>1</sub> NeuAc <sub>2</sub>                    | 0.86 ± 0.07    | 1.02 ± 0.40          |
| 21      | HexNAc <sub>6</sub> Hex <sub>3</sub> Fuc <sub>1</sub> NeuAc <sub>1</sub>                    | 1.10 ± 0.10    | 0.41 ± 0.07          |
| 22      | HexNAc <sub>5</sub> Hex <sub>6</sub> NeuAc <sub>2</sub>                                     | 1.20 ± 0.07    | 0.54 ± 0.11          |
| 23      | HexNAc <sub>4</sub> Hex <sub>5</sub> Fuc <sub>1</sub> NeuAc <sub>2</sub>                    | 1.25 ± 0.48    | 1.00 ± 0.30          |
| 24      | HexNAc <sub>5</sub> Hex <sub>4</sub> Fuc <sub>1</sub> NeuAc <sub>1</sub> S                  | 1.30 ± 0.10    | 0.65 ± 0.32          |
| 25      | HexNAc <sub>5</sub> Hex <sub>4</sub> Fuc <sub>1</sub> NeuAc <sub>2</sub>                    | 1.35 ± 0.10    | -                    |
| 26      | HexNAc <sub>4</sub> Hex <sub>5</sub> Fuc <sub>1</sub> NeuAc <sub>1</sub> NeuGc <sub>1</sub> | 1.36 ± 0.46    | 1.13 ± 0.07          |
| 27      | HexNAc <sub>5</sub> Hex <sub>6</sub> NeuAc <sub>3</sub>                                     | 1.42 ± 0.18    | 1.54 ± 0.52          |
| 28      | $\alpha$ -D-Neu5Ac-(2→6)- $\beta$ -D-Gal-(1→4)-D-Glc                                        | 1.60 ± 0.40    | -                    |
| 29      | HexNAc <sub>6</sub> Hex <sub>7</sub> Fuc <sub>1</sub> NeuAc <sub>2</sub>                    | 1.85 ± 0.10    | -                    |
| 30      | HexNAc <sub>4</sub> Hex <sub>5</sub> NeuAc <sub>2</sub>                                     | 2.07 ± 0.76    | 0.94 ± 0.16          |
| 31      | HexNAc <sub>4</sub> Hex <sub>5</sub> Fuc <sub>1</sub> NeuGc <sub>2</sub>                    | 2.25 ± 0.07    | 1.69 ± 0.38          |
| 32      | HexNAc <sub>5</sub> Hex <sub>6</sub> NeuAc <sub>1</sub> NeuGc <sub>1</sub>                  | 5.40 ± 0.50    | 0.79 ± 0.42          |
| 33      | HexNAc <sub>5</sub> Hex <sub>5</sub> Fuc <sub>1</sub> NeuAc <sub>1</sub>                    | NQ             | -                    |
| 34      | HexNAc <sub>4</sub> Hex <sub>5</sub> NeuAc <sub>2</sub> Ac                                  | NQ             | 1.30 ± 0.71          |
| 35      | HexNAc <sub>5</sub> Hex <sub>5</sub> Fuc <sub>1</sub> NeuAc <sub>2</sub>                    | NQ             | -                    |
| 36      | HexNAc <sub>5</sub> Hex <sub>6</sub> NeuGc <sub>2</sub>                                     | NQ             | 0.51 ± 0.14          |
| 37      | HexNAc <sub>5</sub> Hex <sub>6</sub> Fuc <sub>2</sub> NeuAc <sub>2</sub>                    | NQ             | -                    |
| 38      | HexNAc <sub>5</sub> Hex <sub>6</sub> NeuAc <sub>4</sub>                                     | NQ             | -                    |
| 39      | HexNAc <sub>6</sub> Hex <sub>5</sub> Fuc <sub>1</sub> NeuAc <sub>2</sub>                    | NQ             | -                    |

<sup>a</sup> Errors correspond to one standard deviation.

<sup>b</sup> NQ  $\equiv$  detected but not quantified.

**Table S13.** Affinities ( $K_d$ ,  $\mu\text{M}$ ) measured by COIN-CaR-nMS screening of *N*-glycan (native and all  $\alpha$ 2-3-linked) natural libraries and 3SL (**G22**) and 3SLN (**G25**) against MAA. Measurements were performed on ammonium acetate solutions (200 mM, pH 6.9).<sup>a,b</sup>

| Order # | Glycan composition                                                         | $K_d$       |
|---------|----------------------------------------------------------------------------|-------------|
| 1       | HexNAc <sub>5</sub> Hex <sub>6</sub> NeuAc <sub>3</sub>                    | 0.35 ± 0.11 |
| 2       | HexNAc <sub>4</sub> Hex <sub>5</sub> Fuc <sub>1</sub> NeuAc <sub>2</sub>   | 0.39 ± 0.08 |
| 3       | HexNAc <sub>5</sub> Hex <sub>6</sub> Fuc <sub>3</sub> NeuAc <sub>1</sub>   | 0.40 ± 0.14 |
| 4       | HexNAc <sub>5</sub> Hex <sub>5</sub> NeuAc <sub>2</sub>                    | 0.44 ± 0.20 |
| 5       | HexNAc <sub>4</sub> Hex <sub>5</sub> NeuAc <sub>1</sub> NeuGc <sub>1</sub> | 0.48 ± 0.17 |
| 6       | HexNAc <sub>5</sub> Hex <sub>6</sub> Fuc <sub>1</sub> NeuAc <sub>3</sub>   | 0.48 ± 0.15 |
| 7       | HexNAc <sub>4</sub> Hex <sub>5</sub> NeuGc <sub>2</sub>                    | 0.49 ± 0.20 |
| 8       | HexNAc <sub>4</sub> Hex <sub>5</sub> NeuAc <sub>2</sub>                    | 0.52 ± 0.20 |
| 9       | HexNAc <sub>4</sub> Hex <sub>5</sub> Fuc <sub>1</sub> NeuAc <sub>1</sub>   | 0.57 ± 0.16 |
| 10      | HexNAc <sub>5</sub> Hex <sub>4</sub> Fuc <sub>1</sub> NeuAc <sub>1</sub>   | 0.58 ± 0.14 |
| 11      | HexNAc <sub>6</sub> Hex <sub>7</sub> Fuc <sub>1</sub> NeuAc <sub>2</sub>   | 0.58 ± 0.07 |
| 12      | HexNAc <sub>5</sub> Hex <sub>6</sub> Fuc <sub>1</sub> NeuAc <sub>2</sub>   | 0.66 ± 0.17 |
| 13      | HexNAc <sub>5</sub> Hex <sub>6</sub> NeuAc <sub>1</sub>                    | 0.67 ± 0.07 |
| 14      | HexNAc <sub>4</sub> Hex <sub>4</sub> Fuc <sub>1</sub> NeuAc <sub>1</sub>   | 0.73 ± 0.24 |
| 15      | HexNAc <sub>4</sub> Hex <sub>5</sub> NeuAc <sub>2</sub> Ac                 | 0.80 ± 0.35 |
| 16      | HexNAc <sub>5</sub> Hex <sub>4</sub> Fuc <sub>1</sub> NeuAc <sub>1</sub> S | 0.90 ± 0.20 |
| 17      | HexNAc <sub>5</sub> Hex <sub>4</sub> Fuc <sub>1</sub> NeuAc <sub>1</sub>   | 0.99 ± 0.36 |
| 18      | HexNAc <sub>5</sub> Hex <sub>6</sub> NeuAc <sub>2</sub>                    | 1.06 ± 0.04 |
| 19      | HexNAc <sub>4</sub> Hex <sub>5</sub> NeuGc <sub>1</sub>                    | 1.10 ± 0.70 |
| 20      | HexNAc <sub>4</sub> Hex <sub>5</sub> Fuc <sub>2</sub> NeuAc <sub>1</sub>   | 1.17 ± 0.40 |
| 21      | HexNAc <sub>4</sub> Hex <sub>5</sub> NeuAc <sub>1</sub>                    | 1.76 ± 0.69 |
| 22      | $\alpha$ -D-Neu5Ac-(2→3)- $\beta$ -D-Gal-(1→4)-D-GlcNAc                    | 2.14 ± 0.46 |
| 23      | $\alpha$ -D-Neu5Ac-(2→3)- $\beta$ -D-Gal-(1→4)-D-Glc                       | 3.50 ± 1.50 |
| 24      | HexNAc <sub>4</sub> Hex <sub>5</sub> Fuc <sub>1</sub> NeuGc <sub>2</sub>   | NQ          |
| 25      | HexNAc <sub>6</sub> Hex <sub>5</sub> Fuc <sub>1</sub> NeuAc <sub>2</sub>   | NQ          |
| 26      | HexNAc <sub>5</sub> Hex <sub>6</sub> NeuAc <sub>1</sub> NeuGc <sub>1</sub> | NQ          |
| 27      | HexNAc <sub>5</sub> Hex <sub>6</sub> NeuGc <sub>2</sub>                    | NQ          |
| 28      | HexNAc <sub>5</sub> Hex <sub>6</sub> NeuAc <sub>4</sub>                    | NQ          |

<sup>a</sup> Errors correspond to one standard deviation.

<sup>b</sup> NQ  $\equiv$  detected but not quantified.

**Table S14.** Affinities ( $K_d$ ,  $\mu\text{M}$ ) measured by COIN-CaR-nMS screening of *N*-glycan natural libraries against AAL. Measurements were performed on ammonium acetate solutions (200 mM, pH 6.9).<sup>a,b</sup>

| Order # | Glycan composition                                                                          | $K_d$       |
|---------|---------------------------------------------------------------------------------------------|-------------|
| 1       | HexNAc <sub>5</sub> Hex <sub>6</sub> Fuc <sub>1</sub> NeuAc <sub>1</sub>                    | 0.27 ± 0.13 |
| 2       | HexNAc <sub>4</sub> Hex <sub>5</sub> Fuc <sub>2</sub> NeuAc <sub>1</sub>                    | 0.46 ± 0.20 |
| 3       | HexNAc <sub>4</sub> Hex <sub>5</sub> Fuc <sub>3</sub> NeuAc <sub>1</sub>                    | 0.50 ± 0.05 |
| 4       | HexNAc <sub>4</sub> Hex <sub>5</sub> Fuc <sub>2</sub> NeuAc <sub>1</sub>                    | 0.57 ± 0.10 |
| 5       | HexNAc <sub>6</sub> Hex <sub>3</sub> Fuc <sub>1</sub> S                                     | 0.60 ± 0.14 |
| 6       | HexNAc <sub>5</sub> Hex <sub>4</sub> Fuc <sub>2</sub> NeuAc <sub>1</sub>                    | 0.60 ± 0.09 |
| 7       | HexNAc <sub>5</sub> Hex <sub>5</sub> Fuc <sub>1</sub> NeuAc <sub>1</sub>                    | 0.61 ± 0.01 |
| 8       | HexNAc <sub>4</sub> Hex <sub>5</sub> Fuc <sub>1</sub> NeuGc <sub>2</sub>                    | 0.64 ± 0.34 |
| 9       | HexNAc <sub>4</sub> Hex <sub>4</sub> Fuc <sub>1</sub> NeuAc <sub>1</sub>                    | 0.65 ± 0.07 |
| 10      | HexNAc <sub>3</sub> Hex <sub>7</sub> Fuc <sub>1</sub>                                       | 0.70 ± 0.20 |
| 11      | HexNAc <sub>4</sub> Hex <sub>6</sub> Fuc <sub>2</sub>                                       | 0.70 ± 0.10 |
| 12      | HexNAc <sub>5</sub> Hex <sub>4</sub> Fuc <sub>1</sub> NeuAc <sub>1</sub>                    | 0.72 ± 0.30 |
| 13      | HexNAc <sub>6</sub> Hex <sub>3</sub> Fuc <sub>1</sub> S <sub>2</sub>                        | 0.90 ± 0.14 |
| 14      | HexNAc <sub>5</sub> Hex <sub>6</sub> Fuc <sub>1</sub> NeuAc <sub>2</sub>                    | 1.00 ± 0.30 |
| 15      | HexNAc <sub>4</sub> Hex <sub>5</sub> Fuc <sub>1</sub> NeuAc <sub>1</sub> NeuGc <sub>1</sub> | 1.10 ± 0.07 |
| 16      | HexNAc <sub>4</sub> Hex <sub>6</sub> Fuc <sub>1</sub> NeuAc <sub>1</sub>                    | 1.30 ± 0.40 |
| 17      | HexNAc <sub>4</sub> Hex <sub>5</sub> Fuc <sub>3</sub>                                       | 1.34 ± 0.38 |
| 18      | HexNAc <sub>3</sub> Hex <sub>4</sub> Fuc <sub>1</sub> NeuAc <sub>1</sub>                    | 1.40 ± 0.40 |
| 19      | HexNAc <sub>5</sub> Hex <sub>4</sub> Fuc <sub>1</sub> NeuAc <sub>1</sub> S                  | 1.30 ± 0.56 |
| 20      | HexNAc <sub>5</sub> Hex <sub>3</sub> Fuc <sub>1</sub> NeuAc <sub>1</sub>                    | 1.50 ± 0.10 |
| 21      | HexNAc <sub>4</sub> Hex <sub>5</sub> Fuc <sub>1</sub> NeuAc <sub>2</sub>                    | 1.64 ± 0.40 |
| 22      | HexNAc <sub>5</sub> Hex <sub>4</sub> Fuc <sub>1</sub> NeuAc <sub>1</sub>                    | 1.80 ± 0.10 |
| 23      | HexNAc <sub>5</sub> Hex <sub>5</sub> Fuc <sub>1</sub> NeuAc <sub>1</sub>                    | 1.83 ± 0.76 |
| 24      | HexNAc <sub>3</sub> Hex <sub>3</sub> Fuc <sub>1</sub>                                       | 1.85 ± 0.07 |
| 25      | HexNAc <sub>3</sub> Hex <sub>5</sub> Fuc <sub>1</sub> NeuAc <sub>1</sub>                    | 1.85 ± 0.35 |
| 26      | HexNAc <sub>4</sub> Hex <sub>4</sub> Fuc <sub>2</sub>                                       | 2.20 ± 0.14 |
| 27      | HexNAc <sub>3</sub> Hex <sub>4</sub> Fuc <sub>1</sub> NeuAc <sub>1</sub>                    | 2.30 ± 0.57 |
| 28      | HexNAc <sub>5</sub> Hex <sub>5</sub> Fuc <sub>1</sub> NeuAc <sub>2</sub>                    | 2.50 ± 0.64 |
| 29      | HexNAc <sub>4</sub> Hex <sub>3</sub> Fuc <sub>1</sub>                                       | 2.60 ± 0.57 |
| 30      | HexNAc <sub>5</sub> Hex <sub>4</sub> Fuc <sub>2</sub> S <sub>1</sub>                        | 2.80 ± 1.30 |
| 31      | HexNAc <sub>5</sub> Hex <sub>6</sub> Fuc <sub>2</sub> NeuAc <sub>2</sub>                    | 3.40 ± 0.85 |
| 32      | HexNAc <sub>3</sub> Hex <sub>3</sub> Fuc <sub>1</sub> NeuAc <sub>1</sub>                    | NQ          |
| 33      | HexNAc <sub>5</sub> Hex <sub>6</sub> Fuc <sub>3</sub>                                       | NQ          |
| 34      | HexNAc <sub>5</sub> Hex <sub>6</sub> Fuc <sub>2</sub> NeuAc <sub>1</sub>                    | NQ          |
| 35      | HexNAc <sub>5</sub> Hex <sub>6</sub> Fuc <sub>4</sub>                                       | NQ          |
| 36      | HexNAc <sub>5</sub> Hex <sub>6</sub> Fuc <sub>1</sub> NeuAc <sub>3</sub>                    | NQ          |
| 37      | HexNAc <sub>6</sub> Hex <sub>5</sub> Fuc <sub>1</sub> NeuAc <sub>3</sub>                    | NQ          |
| 38      | HexNAc <sub>4</sub> Hex <sub>5</sub> Fuc <sub>2</sub> NeuAc <sub>2</sub>                    | NQ          |
| 39      | HexNAc <sub>6</sub> Hex <sub>5</sub> Fuc <sub>1</sub> NeuAc <sub>2</sub>                    | NQ          |
| 40      | HexNAc <sub>4</sub> Hex <sub>4</sub> Fuc <sub>1</sub>                                       | NQ          |



|    |                                                                          |    |
|----|--------------------------------------------------------------------------|----|
| 41 | HexNAc <sub>5</sub> Hex <sub>3</sub> Fuc <sub>1</sub> S <sub>1</sub>     | NQ |
| 42 | HexNAc <sub>4</sub> Hex <sub>5</sub> Fuc <sub>1</sub>                    | NQ |
| 43 | HexNAc <sub>4</sub> Hex <sub>5</sub> Fuc <sub>2</sub>                    | NQ |
| 44 | HexNAc <sub>6</sub> Hex <sub>3</sub> Fuc <sub>1</sub> NeuAc <sub>1</sub> | NQ |
| 45 | HexNAc <sub>6</sub> Hex <sub>3</sub> Fuc <sub>2</sub> NeuAc <sub>1</sub> | NQ |

<sup>a</sup> Errors correspond to one standard deviation.

<sup>b</sup> NQ ≡ detected but not quantified.

**Table S15.** Affinities ( $K_d$ ,  $\mu\text{M}$ ) measured by COIN-CaR-nMS screening of *N*-glycan (native and all  $\alpha$ 2-6- and all  $\alpha$ 2-3-linked) natural libraries against RCA-I. Measurements were performed on ammonium acetate solutions (200 mM, pH 6.9).<sup>a,b</sup>

| Order # | Glycan composition                                                                          | $K_d$<br>(Native) | $K_d$<br>( $\alpha$ 2-6-<br>NeuAc) | $K_d$<br>( $\alpha$ 2-3-<br>NeuAc) |
|---------|---------------------------------------------------------------------------------------------|-------------------|------------------------------------|------------------------------------|
| 1       | HexNAc <sub>6</sub> Hex <sub>7</sub> Fuc <sub>1</sub> NeuAc <sub>2</sub>                    | 0.26 ± 0.11       |                                    |                                    |
| 2       | HexNAc <sub>5</sub> Hex <sub>6</sub> Fuc <sub>2</sub>                                       | 0.26 ± 0.18       |                                    |                                    |
| 3       | HexNAc <sub>5</sub> Hex <sub>5</sub> Fuc <sub>2</sub>                                       | 0.31 ± 0.09       |                                    |                                    |
| 4       | HexNAc <sub>5</sub> Hex <sub>6</sub> Fuc <sub>2</sub>                                       | 0.32 ± 0.16       |                                    |                                    |
| 5       | HexNAc <sub>5</sub> Hex <sub>6</sub> NeuAc <sub>2</sub> NeuGc <sub>1</sub>                  | 0.32 ± 0.10       |                                    |                                    |
| 6       | HexNAc <sub>5</sub> Hex <sub>6</sub> NeuAc <sub>3</sub>                                     | 0.39 ± 0.17       |                                    |                                    |
| 7       | HexNAc <sub>5</sub> Hex <sub>6</sub> Fuc <sub>1</sub>                                       | 0.39 ± 0.10       |                                    |                                    |
| 8       | HexNAc <sub>5</sub> Hex <sub>6</sub> NeuAc <sub>2</sub>                                     | 0.42 ± 0.06       |                                    |                                    |
| 9       | HexNAc <sub>5</sub> Hex <sub>6</sub> Fuc <sub>1</sub> NeuAc <sub>1</sub>                    | 0.49 ± 0.08       |                                    |                                    |
| 10      | HexNAc <sub>4</sub> Hex <sub>5</sub> Fuc <sub>1</sub> NeuAc <sub>1</sub> NeuGc <sub>1</sub> | 0.49 ± 0.09       |                                    |                                    |
| 11      | HexNAc <sub>5</sub> Hex <sub>6</sub> Fuc <sub>2</sub> NeuAc <sub>1</sub>                    | 0.49 ± 0.09       |                                    |                                    |
| 12      | HexNAc <sub>4</sub> Hex <sub>6</sub> Fuc <sub>1</sub> NeuAc <sub>1</sub>                    | 0.50 ± 0.08       |                                    |                                    |
| 13      | HexNAc <sub>4</sub> Hex <sub>5</sub> Fuc <sub>1</sub> NeuGc <sub>2</sub>                    | 0.50 ± 0.09       |                                    |                                    |
| 14      | HexNAc <sub>5</sub> Hex <sub>6</sub> NeuGc <sub>2</sub>                                     | 0.51 ± 0.17       |                                    |                                    |
| 15      | HexNAc <sub>5</sub> Hex <sub>4</sub> Fuc <sub>2</sub> NeuAc <sub>1</sub>                    | 0.53 ± 0.21       |                                    |                                    |
| 16      | HexNAc <sub>5</sub> Hex <sub>6</sub> Fuc <sub>1</sub> NeuAc <sub>2</sub>                    | 0.56 ± 0.15       |                                    |                                    |
| 17      | HexNAc <sub>4</sub> Hex <sub>6</sub> NeuGc <sub>1</sub>                                     | 0.56 ± 0.17       |                                    |                                    |
| 18      | HexNAc <sub>5</sub> Hex <sub>4</sub> Fuc <sub>1</sub>                                       | 0.57 ± 0.20       |                                    |                                    |
| 19      | HexNAc <sub>4</sub> Hex <sub>5</sub> Fuc <sub>1</sub> NeuGc <sub>1</sub>                    | 0.57 ± 0.18       |                                    |                                    |
| 20      | HexNAc <sub>5</sub> Hex <sub>5</sub> NeuAc <sub>2</sub>                                     | 0.58 ± 0.10       |                                    |                                    |
| 21      | HexNAc <sub>5</sub> Hex <sub>6</sub> NeuAc <sub>1</sub> NeuGc <sub>1</sub>                  | 0.58 ± 0.09       |                                    |                                    |
| 22      | HexNAc <sub>4</sub> Hex <sub>4</sub> Fuc <sub>3</sub>                                       | 0.64 ± 0.20       |                                    |                                    |
| 23      | HexNAc <sub>4</sub> Hex <sub>5</sub> NeuAc <sub>1</sub>                                     | 0.64 ± 0.04       |                                    |                                    |
| 24      | HexNAc <sub>5</sub> Hex <sub>4</sub> Fuc <sub>1</sub> NeuAc <sub>1</sub> S                  | 0.70 ± 0.04       |                                    |                                    |
| 25      | HexNAc <sub>4</sub> Hex <sub>5</sub> NeuGc <sub>1</sub>                                     | 0.74 ± 0.07       |                                    |                                    |
| 26      | HexNAc <sub>4</sub> Hex <sub>5</sub> Fuc <sub>2</sub> NeuAc <sub>1</sub>                    | 0.75 ± 0.15       |                                    |                                    |
| 27      | HexNAc <sub>3</sub> Hex <sub>4</sub> Fuc <sub>2</sub>                                       | 0.77 ± 0.19       |                                    |                                    |
| 28      | HexNAc <sub>4</sub> Hex <sub>5</sub> Fuc <sub>3</sub> NeuAc <sub>1</sub>                    | 0.84 ± 0.04       |                                    |                                    |
| 29      | HexNAc <sub>5</sub> Hex <sub>4</sub> Fuc <sub>2</sub> NeuAc <sub>1</sub>                    | 0.84 ± 0.18       |                                    |                                    |
| 30      | HexNAc <sub>4</sub> Hex <sub>5</sub> Fuc <sub>3</sub>                                       | 0.84 ± 0.20       |                                    |                                    |
| 31      | HexNAc <sub>5</sub> Hex <sub>6</sub> Fuc <sub>2</sub> NeuAc <sub>2</sub>                    | 0.90 ± 0.08       |                                    |                                    |
| 32      | HexNAc <sub>5</sub> Hex <sub>6</sub> NeuGc <sub>1</sub>                                     | 0.90 ± 0.10       |                                    |                                    |
| 33      | HexNAc <sub>4</sub> Hex <sub>4</sub> Fuc <sub>1</sub> NeuAc <sub>1</sub>                    | 0.91 ± 0.26       |                                    |                                    |
| 34      | HexNAc <sub>4</sub> Hex <sub>5</sub> NeuGc <sub>2</sub>                                     | 0.95 ± 0.15       |                                    |                                    |
| 35      | HexNAc <sub>6</sub> Hex <sub>5</sub> Fuc <sub>1</sub> NeuAc <sub>2</sub>                    | 0.96 ± 0.01       |                                    |                                    |
| 36      | HexNAc <sub>5</sub> Hex <sub>6</sub> NeuAc <sub>1</sub>                                     | 1.05 ± 0.01       | 0.90 ± 0.23                        | 0.80 ± 0.29                        |
| 37      | HexNAc <sub>4</sub> Hex <sub>5</sub> NeuAc <sub>2</sub>                                     | 1.09 ± 0.16       | 1.10 ± 0.01                        | 2.16 ± 0.01                        |
| 38      | HexNAc <sub>4</sub> Hex <sub>5</sub> NeuAc <sub>1</sub> NeuGc <sub>1</sub>                  | 1.10 ± 0.29       |                                    |                                    |
| 39      | HexNAc <sub>5</sub> Hex <sub>5</sub> Fuc <sub>1</sub> NeuAc <sub>1</sub>                    | 1.13 ± 0.44       |                                    |                                    |

|    |                                                                          |             |  |  |
|----|--------------------------------------------------------------------------|-------------|--|--|
| 40 | HexNAc <sub>5</sub> Hex <sub>6</sub> Fuc <sub>2</sub> NeuAc <sub>1</sub> | 1.17 ± 0.01 |  |  |
| 41 | HexNAc <sub>3</sub> Hex <sub>5</sub> Fuc <sub>1</sub>                    | 1.17 ± 0.33 |  |  |
| 42 | HexNAc <sub>4</sub> Hex <sub>5</sub> Fuc <sub>1</sub> NeuAc <sub>1</sub> | 1.20 ± 0.27 |  |  |
| 43 | HexNAc <sub>4</sub> Hex <sub>5</sub>                                     | 1.22 ± 0.03 |  |  |
| 44 | HexNAc <sub>5</sub> Hex <sub>5</sub> NeuAc <sub>1</sub>                  | 1.24 ± 0.23 |  |  |
| 45 | HexNAc <sub>5</sub> Hex <sub>4</sub> Fuc <sub>1</sub> NeuAc <sub>1</sub> | 1.28 ± 0.42 |  |  |
| 46 | HexNAc <sub>4</sub> Hex <sub>4</sub> Fuc <sub>1</sub>                    | 1.30 ± 0.45 |  |  |
| 47 | HexNAc <sub>6</sub> Hex <sub>3</sub> Fuc <sub>1</sub> NeuAc <sub>1</sub> | 1.30 ± 0.09 |  |  |
| 48 | HexNAc <sub>4</sub> Hex <sub>4</sub> NeuAc <sub>1</sub>                  | 1.35 ± 0.33 |  |  |
| 49 | HexNAc <sub>4</sub> Hex <sub>5</sub> Fuc <sub>1</sub>                    | 1.40 ± 0.40 |  |  |
| 50 | HexNAc <sub>5</sub> Hex <sub>4</sub> Fuc <sub>1</sub> S                  | 1.43 ± 0.08 |  |  |
| 51 | HexNAc <sub>4</sub> Hex <sub>5</sub> Fuc <sub>2</sub> NeuAc <sub>2</sub> | 1.50 ± 0.03 |  |  |
| 52 | HexNAc <sub>4</sub> Hex <sub>5</sub> Fuc <sub>2</sub>                    | 1.63 ± 0.28 |  |  |
| 53 | HexNAc <sub>4</sub> Hex <sub>3</sub> Fuc <sub>1</sub>                    | 1.73 ± 0.08 |  |  |
| 54 | HexNAc <sub>4</sub> Hex <sub>5</sub> Fuc <sub>1</sub> NeuAc <sub>2</sub> | 1.74 ± 0.60 |  |  |
| 55 | HexNAc <sub>5</sub> Hex <sub>4</sub> Fuc <sub>1</sub> NeuAc <sub>2</sub> | 1.97 ± 0.90 |  |  |
| 56 | HexNAc <sub>4</sub> Hex <sub>4</sub>                                     | 2.10 ± 0.70 |  |  |
| 57 | HexNAc <sub>5</sub> Hex <sub>5</sub> Fuc <sub>3</sub>                    | 2.30 ± 0.32 |  |  |
| 58 | HexNAc <sub>4</sub> Hex <sub>4</sub> Fuc <sub>2</sub>                    | 2.40 ± 0.50 |  |  |
| 59 | HexNAc <sub>4</sub> Hex <sub>3</sub> Fuc <sub>2</sub>                    | 2.70 ± 0.44 |  |  |
| 60 | HexNAc <sub>5</sub> Hex <sub>4</sub> Fuc <sub>3</sub>                    | 2.70 ± 0.80 |  |  |
| 61 | HexNAc <sub>5</sub> Hex <sub>3</sub> Fuc <sub>2</sub>                    | 4.40 ± 0.14 |  |  |
| 62 | HexNAc <sub>5</sub> Hex <sub>3</sub> Fuc <sub>1</sub> NeuAc <sub>1</sub> | NQ          |  |  |

<sup>a</sup> Errors correspond to one standard deviation.

<sup>b</sup> NQ ≡ detected but not quantified.

**Table S16.** Affinities ( $K_d$ ,  $\mu\text{M}$ ) measured by COIN-CaR-nMS screening of *N*-glycan (native and all  $\alpha$ 2-6- and all  $\alpha$ 2-3-linked) natural libraries against PHA-E. Measurements were performed on ammonium acetate solutions (200 mM, pH 6.9).<sup>a,b</sup>

| Order # | Glycan composition                                                                          | $K_d$<br>(Native) | $K_d$<br>( $\alpha$ 2-6-<br>NeuAc) | $K_d$<br>( $\alpha$ 2-3-<br>NeuAc) |
|---------|---------------------------------------------------------------------------------------------|-------------------|------------------------------------|------------------------------------|
| 1       | HexNAc <sub>5</sub> Hex <sub>5</sub> Fuc <sub>1</sub> NeuAc <sub>1</sub>                    | 9.3 ± 2.1         |                                    |                                    |
| 2       | HexNAc <sub>4</sub> Hex <sub>5</sub> NeuAc <sub>1</sub>                                     | 10.3 ± 1.1        | 20.6 ± 0.8                         | 11.9 ± 4.3                         |
| 3       | HexNAc <sub>4</sub> Hex <sub>5</sub> Fuc <sub>1</sub> NeuGc <sub>1</sub>                    | 11.1 ± 0.6        |                                    |                                    |
| 4       | HexNAc <sub>4</sub> Hex <sub>5</sub> Fuc <sub>2</sub> NeuAc <sub>1</sub>                    | 11.2 ± 1.8        |                                    |                                    |
| 5       | HexNAc <sub>5</sub> Hex <sub>4</sub> Fuc <sub>1</sub> NeuAc <sub>1</sub>                    | 11.3 ± 1.3        |                                    |                                    |
| 6       | HexNAc <sub>4</sub> Hex <sub>5</sub> NeuAc <sub>2</sub>                                     | 11.4 ± 0.9        | 31.6 ± 4.9                         | 14.5 ± 0.5                         |
| 7       | HexNAc <sub>5</sub> Hex <sub>5</sub> NeuAc <sub>2</sub>                                     | 11.4 ± 1.6        |                                    |                                    |
| 8       | HexNAc <sub>4</sub> Hex <sub>5</sub> NeuGc <sub>1</sub>                                     | 12.1 ± 0.6        |                                    |                                    |
| 9       | HexNAc <sub>4</sub> Hex <sub>5</sub> Fuc <sub>1</sub>                                       | 12.3 ± 3.6        |                                    |                                    |
| 10      | HexNAc <sub>4</sub> Hex <sub>5</sub>                                                        | 13.1 ± 0.8        |                                    |                                    |
| 11      | HexNAc <sub>4</sub> Hex <sub>4</sub> Fuc <sub>2</sub>                                       | 13.7 ± 1.2        |                                    |                                    |
| 12      | HexNAc <sub>5</sub> Hex <sub>4</sub> Fuc <sub>2</sub> NeuAc <sub>1</sub>                    | 14.1 ± 1.1        |                                    |                                    |
| 13      | HexNAc <sub>4</sub> Hex <sub>5</sub> Fuc <sub>1</sub> NeuAc <sub>2</sub>                    | 15.1 ± 0.5        |                                    |                                    |
| 14      | HexNAc <sub>4</sub> Hex <sub>5</sub> NeuAc <sub>1</sub> NeuGc <sub>1</sub>                  | 15.9 ± 2.7        |                                    |                                    |
| 15      | HexNAc <sub>4</sub> Hex <sub>5</sub> Fuc <sub>1</sub> NeuAc <sub>1</sub> NeuGc <sub>1</sub> | 16.0 ± 0.6        |                                    |                                    |
| 16      | HexNAc <sub>4</sub> Hex <sub>5</sub> Fuc <sub>1</sub> NeuAc <sub>1</sub>                    | 16.0 ± 0.4        |                                    |                                    |
| 17      | HexNAc <sub>5</sub> Hex <sub>6</sub> NeuAc <sub>1</sub>                                     | 16.1 ± 2.3        | 26.4 ± 4.0                         | 15.5 ± 0.5                         |
| 18      | HexNAc <sub>4</sub> Hex <sub>5</sub> Fuc <sub>1</sub> NeuGc <sub>2</sub>                    | 17.8 ± 1.8        |                                    |                                    |
| 19      | HexNAc <sub>5</sub> Hex <sub>6</sub> NeuAc <sub>3</sub>                                     | 18.5 ± 3.3        | -                                  | 17.8 ± 0.4                         |
| 20      | HexNAc <sub>4</sub> Hex <sub>3</sub> Fuc <sub>1</sub>                                       | 18.6 ± 3.5        |                                    |                                    |
| 21      | HexNAc <sub>4</sub> Hex <sub>5</sub> NeuGc <sub>2</sub>                                     | 19.9 ± 0.1        |                                    |                                    |
| 22      | HexNAc <sub>5</sub> Hex <sub>6</sub> NeuGc <sub>1</sub>                                     | 19.9 ± 6.8        |                                    |                                    |
| 23      | HexNAc <sub>5</sub> Hex <sub>6</sub> NeuGc <sub>2</sub>                                     | 22.8 ± 4.5        |                                    |                                    |
| 24      | HexNAc <sub>5</sub> Hex <sub>6</sub> NeuAc <sub>2</sub>                                     | 23.6 ± 1.3        | 36.8 ± 4.1                         | 22.0 ± 2.2                         |
| 25      | HexNAc <sub>5</sub> Hex <sub>6</sub> Fuc <sub>1</sub> NeuAc <sub>2</sub>                    | 25.3 ± 1.6        |                                    |                                    |
| 26      | HexNAc <sub>5</sub> Hex <sub>6</sub> NeuGc <sub>1</sub> NeuAc <sub>1</sub>                  | 26.1 ± 0.9        |                                    |                                    |
| 27      | HexNAc <sub>4</sub> Hex <sub>4</sub> Fuc <sub>1</sub> NeuAc <sub>1</sub>                    | 32.9 ± 2.4        |                                    |                                    |
| 28      | HexNAc <sub>5</sub> Hex <sub>4</sub> Fuc <sub>2</sub> NeuAc <sub>1</sub>                    | NQ                |                                    |                                    |

<sup>a</sup> Errors correspond to one standard deviation.

<sup>b</sup> NQ  $\equiv$  detected but not quantified.

**Table S17.** Affinities ( $K_d$ ,  $\mu\text{M}$ ) measured by COIN-CaR-nMS screening of *N*-glycan (native and all  $\alpha$ 2-6- and all  $\alpha$ 2-3-linked) natural libraries and **G21** against CD22-Fc. Measurements were performed on ammonium acetate solutions (200 mM, pH 6.9).<sup>a,b</sup>

| Order # | Glycan composition                                                         | $K_d$       |
|---------|----------------------------------------------------------------------------|-------------|
| 1       | HexNAc <sub>5</sub> Hex <sub>6</sub> NeuAc <sub>3</sub>                    | 21.5 ± 1.7  |
| 2       | HexNAc <sub>4</sub> Hex <sub>5</sub> NeuAc <sub>2</sub>                    | 23.5 ± 1.4  |
| 3       | HexNAc <sub>5</sub> Hex <sub>6</sub> NeuAc <sub>2</sub>                    | 23.6 ± 6.3  |
| 4       | HexNAc <sub>4</sub> Hex <sub>5</sub> Fuc <sub>1</sub> NeuAc <sub>2</sub>   | 25.4 ± 3.6  |
| 5       | HexNAc <sub>4</sub> Hex <sub>5</sub> NeuAc <sub>1</sub> NeuGc <sub>1</sub> | 25.8 ± 10.0 |
| 6       | HexNAc <sub>4</sub> Hex <sub>5</sub> NeuAc <sub>2</sub> Ac                 | 26.0 ± 3.0  |
| 7       | HexNAc <sub>4</sub> Hex <sub>5</sub> NeuGc <sub>2</sub>                    | 26.0 ± 9.2  |
| 8       | HexNAc <sub>4</sub> Hex <sub>4</sub> Fuc <sub>1</sub> NeuAc <sub>1</sub>   | 30.3 ± 4.1  |
| 9       | HexNAc <sub>4</sub> Hex <sub>5</sub> NeuGc <sub>1</sub>                    | 30.6 ± 10.0 |
| 10      | HexNAc <sub>5</sub> Hex <sub>4</sub> Fuc <sub>1</sub> NeuAc <sub>1</sub>   | 31.0 ± 6.1  |
| 11      | HexNAc <sub>4</sub> Hex <sub>5</sub> Fuc <sub>2</sub> NeuAc <sub>1</sub>   | 31.3 ± 4.1  |
| 12      | HexNAc <sub>4</sub> Hex <sub>5</sub> NeuAc <sub>1</sub>                    | 34.5 ± 6.3  |
| 13      | HexNAc <sub>4</sub> Hex <sub>5</sub> Fuc <sub>1</sub> NeuAc <sub>1</sub>   | 35.2 ± 5.9  |
| 14      | $\alpha$ -D-Neu5Ac-(2→6)- $\beta$ -D-Gal-(1→4)-D-Glc                       | 40.0 ± 1.0  |

<sup>a</sup> Errors correspond to one standard deviation.

<sup>b</sup> NQ  $\equiv$  detected but not quantified.

**Table S18.** Affinities ( $K_d$ ,  $\mu\text{M}$ ) measured by COIN-CaR-nMS screening of *N*-glycan (native and all  $\alpha$ 2-6- and all  $\alpha$ 2-3-linked) natural libraries and purified oligosaccharide against Sig7-Fc. Measurements were performed on ammonium acetate solutions (200 mM, pH 6.9).<sup>a,b</sup>

| Order # | Glycan composition                                                                                                                                              | $K_d$      |
|---------|-----------------------------------------------------------------------------------------------------------------------------------------------------------------|------------|
| 1       | $\alpha$ -D-Neu5Ac-(2→8)- $\alpha$ -D-Neu5Ac-(2→3)- $\beta$ -D-Gal-(1→4)-D-Glc (GD3)                                                                            | 97 ± 14    |
| 2       | $\alpha$ -D-Neu5Ac-(2→8)- $\alpha$ -D-Neu5Ac-(2→8)- $\alpha$ -D-Neu5Ac-(2→3)- $\beta$ -D-Gal-(1→4)-D-Glc (GT3)                                                  | 184 ± 41   |
| 3       | $\alpha$ -D-GalNAc(1→4)-[ $\alpha$ -D-Neu5Ac-(2→8)- $\alpha$ -D-Neu5Ac-(2→3)]- $\beta$ -D-Gal-(1→4)-D-Glc (GD2)                                                 | 205 ± 41   |
| 4       | HexNAc <sub>4</sub> Hex <sub>5</sub> NeuGc <sub>1</sub>                                                                                                         | 220 ± 39   |
| 5       | HexNAc <sub>4</sub> Hex <sub>5</sub> NeuAc <sub>1</sub> NeuGc <sub>1</sub>                                                                                      | 222 ± 43   |
| 6       | $\alpha$ -D-GalNAc(1→4)-[ $\alpha$ -D-Neu5Ac-(2→8)- $\alpha$ -D-Neu5Ac-(2→8)- $\alpha$ -D-Neu5Ac-(2→3)]- $\beta$ -D-Gal-(1→4)-D-Glc (GT2)                       | 235 ± 20   |
| 7       | $\alpha$ -D-Neu5Ac-(2→6)- $\beta$ -D-Gal-(1→4)-D-Glc                                                                                                            | 236 ± 69   |
| 8       | HexNAc <sub>4</sub> Hex <sub>5</sub> NeuAc <sub>1</sub>                                                                                                         | 260 ± 76   |
| 9       | $\alpha$ -D-Neu5Ac-(2→6)- $\beta$ -D-Gal-(1→4)-D-GlcNAc                                                                                                         | 265 ± 66   |
| 10      | $\alpha$ -D-Neu5Ac-(2→3)- $\beta$ -D-Gal-(1→4)-D-GlcNAc                                                                                                         | 267 ± 26   |
| 11      | $\alpha$ -D-Neu5Ac-(2→3)- $\beta$ -D-Gal-(1→4)-D-Glc                                                                                                            | 277 ± 50   |
| 12      | HexNAc <sub>4</sub> Hex <sub>5</sub> NeuAc <sub>2</sub>                                                                                                         | 312 ± 67   |
| 13      | HexNAc <sub>4</sub> Hex <sub>5</sub> NeuGc <sub>2</sub>                                                                                                         | 354 ± 99   |
| 14      | $\beta$ -D-Gal(1→3)- $\alpha$ -D-GalNAc(1→4)-[ $\alpha$ -D-Neu5Ac-(2→3)]- $\beta$ -D-Gal-(1→4)-D-Glc (GM1)                                                      | 437 ± 56   |
| 15      | $\alpha$ -D-GalNAc(1→4)-[ $\alpha$ -D-Neu5Ac-(2→3)]- $\beta$ -D-Gal-(1→4)-D-Glc (GM2)                                                                           | 460 ± 117  |
| 16      | $\beta$ -D-Gal(1→3)- $\alpha$ -D-GalNAc(1→4)-[ $\alpha$ -D-Neu5Ac-(2→8)- $\alpha$ -D-Neu5Ac-(2→3)]- $\beta$ -D-Gal-(1→4)-D-Glc (GD1b)                           | 1217 ± 401 |
| 17      | $\beta$ -D-Gal(1→3)- $\alpha$ -D-GalNAc(1→4)-[ $\alpha$ -D-Neu5Ac-(2→8)- $\alpha$ -D-Neu5Ac-(2→8)- $\alpha$ -D-Neu5Ac-(2→3)]- $\beta$ -D-Gal-(1→4)-D-Glc (GT1c) | NQ         |

<sup>a</sup> Errors correspond to one standard deviation.

<sup>b</sup> NQ  $\equiv$  detected but not quantified.

**Table S19.** Affinities ( $K_d$ ,  $\mu\text{M}$ ) measured by COIN-CaR-nMS screening of *N*-glycan (native and all  $\alpha$ 2-6- and all  $\alpha$ 2-3-linked) natural libraries and **G22** against SARS-CoV-2 RBD. Measurements were performed on ammonium acetate solutions (200 mM, pH 6.9).<sup>a,b</sup>

| Order # | Glycan composition                                                                          | $K_d$    |
|---------|---------------------------------------------------------------------------------------------|----------|
| 1       | HexNAc <sub>4</sub> Hex <sub>5</sub> NeuAc <sub>1</sub>                                     | 52 ± 1   |
| 2       | HexNAc <sub>3</sub> Hex <sub>4</sub> Fuc <sub>1</sub> NeuAc <sub>1</sub>                    | 57 ± 5   |
| 3       | HexNAc <sub>4</sub> Hex <sub>4</sub> Fuc <sub>1</sub> NeuAc <sub>1</sub>                    | 68 ± 14  |
| 4       | HexNAc <sub>4</sub> Hex <sub>5</sub> Fuc <sub>2</sub> NeuAc <sub>1</sub>                    | 69 ± 21  |
| 5       | HexNAc <sub>5</sub> Hex <sub>3</sub> Fuc <sub>1</sub> NeuAc <sub>1</sub>                    | 72 ± 1   |
| 6       | HexNAc <sub>3</sub> Hex <sub>5</sub> Fuc <sub>1</sub> NeuAc <sub>1</sub>                    | 73 ± 20  |
| 7       | $\alpha$ -D-Neu5Ac-(2→6)- $\beta$ -D-Gal-(1→4)-D-GlcNAc                                     | 76 ± 9   |
| 8       | HexNAc <sub>4</sub> Hex <sub>5</sub> NeuAc <sub>1</sub> NeuGc <sub>1</sub>                  | 78 ± 15  |
| 9       | HexNAc <sub>4</sub> Hex <sub>5</sub> NeuGc <sub>1</sub>                                     | 79 ± 2   |
| 10      | HexNAc <sub>3</sub> Hex <sub>5</sub> NeuAc <sub>1</sub>                                     | 80 ± 1   |
| 11      | HexNAc <sub>5</sub> Hex <sub>4</sub> Fuc <sub>1</sub> NeuAc <sub>2</sub>                    | 82 ± 19  |
| 12      | HexNAc <sub>4</sub> Hex <sub>4</sub> NeuAc <sub>1</sub>                                     | 84 ± 2   |
| 13      | HexNAc <sub>4</sub> Hex <sub>5</sub> Fuc <sub>1</sub> NeuGc <sub>2</sub>                    | 98 ± 8   |
| 14      | HexNAc <sub>4</sub> Hex <sub>5</sub> NeuAc <sub>1</sub>                                     | 102 ± 33 |
| 15      | HexNAc <sub>4</sub> Hex <sub>5</sub> Fuc <sub>1</sub> NeuAc <sub>2</sub> S                  | 103 ± 6  |
| 16      | HexNAc <sub>5</sub> Hex <sub>5</sub> Fuc <sub>1</sub> NeuAc <sub>1</sub>                    | 104 ± 6  |
| 17      | HexNAc <sub>5</sub> Hex <sub>6</sub> Fuc <sub>1</sub> NeuAc <sub>1</sub>                    | 105 ± 33 |
| 18      | HexNAc <sub>5</sub> Hex <sub>5</sub> Fuc <sub>1</sub> NeuAc <sub>2</sub>                    | 108 ± 1  |
| 19      | HexNAc <sub>5</sub> Hex <sub>6</sub> NeuGc <sub>1</sub>                                     | 109 ± 11 |
| 20      | HexNAc <sub>4</sub> Hex <sub>6</sub> NeuGc <sub>1</sub>                                     | 113 ± 4  |
| 21      | HexNAc <sub>4</sub> Hex <sub>5</sub> Fuc <sub>1</sub> NeuGc <sub>1</sub>                    | 116 ± 10 |
| 22      | HexNAc <sub>4</sub> Hex <sub>5</sub> NeuAc <sub>2</sub>                                     | 116 ± 18 |
| 23      | HexNAc <sub>4</sub> Hex <sub>5</sub> NeuGc <sub>2</sub>                                     | 117 ± 10 |
| 24      | HexNAc <sub>4</sub> Hex <sub>5</sub> NeuAc <sub>2</sub> Ac                                  | 119 ± 8  |
| 25      | HexNAc <sub>5</sub> Hex <sub>6</sub> NeuAc <sub>1</sub> NeuGc <sub>1</sub>                  | 120 ± 26 |
| 26      | HexNAc <sub>4</sub> Hex <sub>5</sub> Fuc <sub>1</sub> NeuAc <sub>1</sub> NeuGc <sub>1</sub> | 138 ± 6  |
| 27      | HexNAc <sub>5</sub> Hex <sub>6</sub> NeuGc <sub>2</sub>                                     | 140 ± 21 |
| 28      | HexNAc <sub>5</sub> Hex <sub>6</sub> Fuc <sub>2</sub> NeuAc <sub>2</sub>                    | 141 ± 1  |
| 29      | HexNAc <sub>5</sub> Hex <sub>6</sub> NeuAc <sub>3</sub>                                     | 151 ± 40 |
| 30      | HexNAc <sub>4</sub> Hex <sub>5</sub> Fuc <sub>1</sub> NeuAc <sub>1</sub>                    | 153 ± 15 |
| 31      | HexNAc <sub>4</sub> Hex <sub>5</sub> Fuc <sub>1</sub> NeuAc <sub>2</sub>                    | 159 ± 1  |
| 32      | HexNAc <sub>5</sub> Hex <sub>6</sub> NeuAc <sub>1</sub>                                     | 162 ± 4  |
| 33      | HexNAc <sub>5</sub> Hex <sub>6</sub> NeuAc <sub>2</sub>                                     | 202 ± 1  |
| 34      | HexNAc <sub>5</sub> Hex <sub>6</sub> Fuc <sub>1</sub> NeuAc <sub>2</sub>                    | 208 ± 4  |
| 35      | HexNAc <sub>5</sub> Hex <sub>4</sub> Fuc <sub>1</sub> NeuAc <sub>1</sub>                    | 233 ± 45 |
| 36      | HexNAc <sub>3</sub> Hex <sub>4</sub> NeuAc <sub>1</sub>                                     | NQ       |

<sup>a</sup> Errors correspond to one standard deviation.

<sup>b</sup> NQ  $\equiv$  detected but not quantified.

## Figures

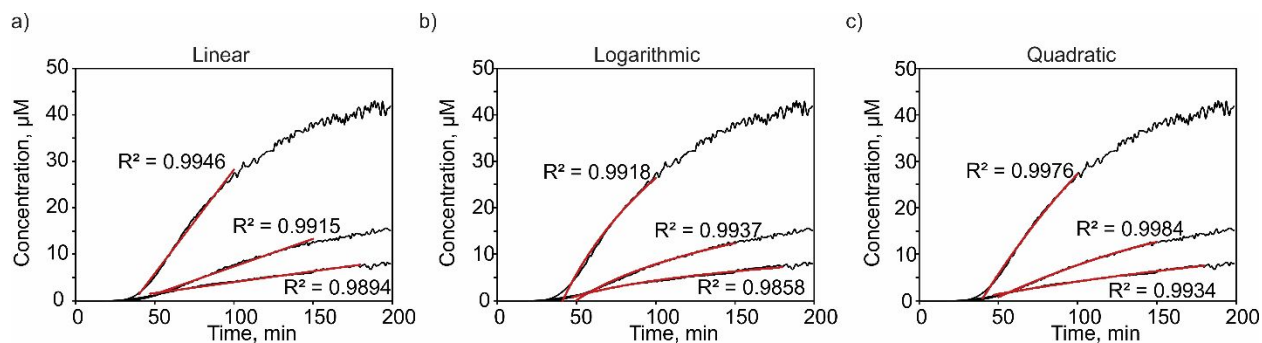

**Figure S1.** Time-dependent concentration changes of **G23** in the presence of GBP (GAL-3C) with concentration in Solution 2 of 20, 50 and 100  $\mu\text{M}$ . Red curves are the best fit for the region of data after mixing onset using (a) linear ( $y = ax+b$ ), (b) logarithmic ( $y = a\ln(x)+b$ ) and (c) quadratic models ( $y = ax^2 + bx+c$ ).



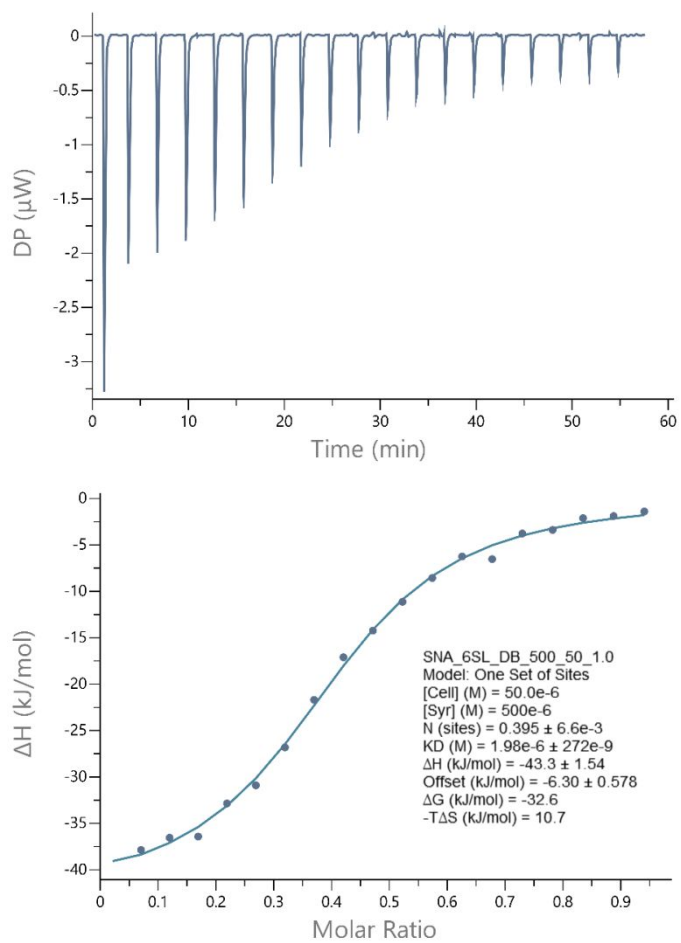

**Figure S2.** ITC data measured for the binding of SNA (50  $\mu$ M) to **G21** (0.5 mM) in aqueous ammonium acetate (200 mM, pH 6.9 and 25  $^{\circ}$ C).

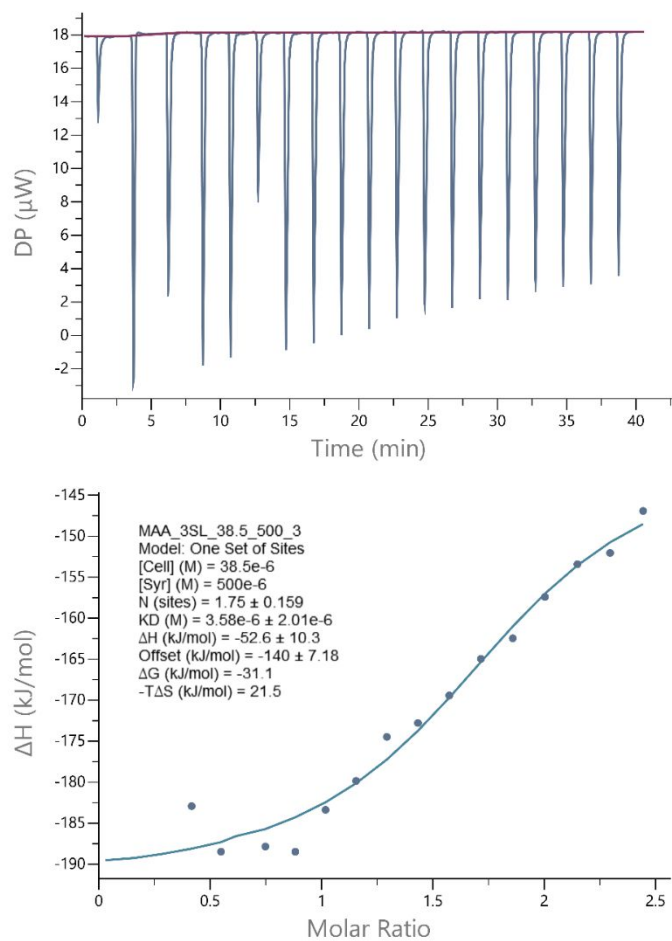

**Figure S3.** ITC data measured for the binding of MAA (38.5  $\mu$ M) to G23 (0.5 mM) in aqueous ammonium acetate (200 mM, pH 6.9 and 25  $^{\circ}$ C).

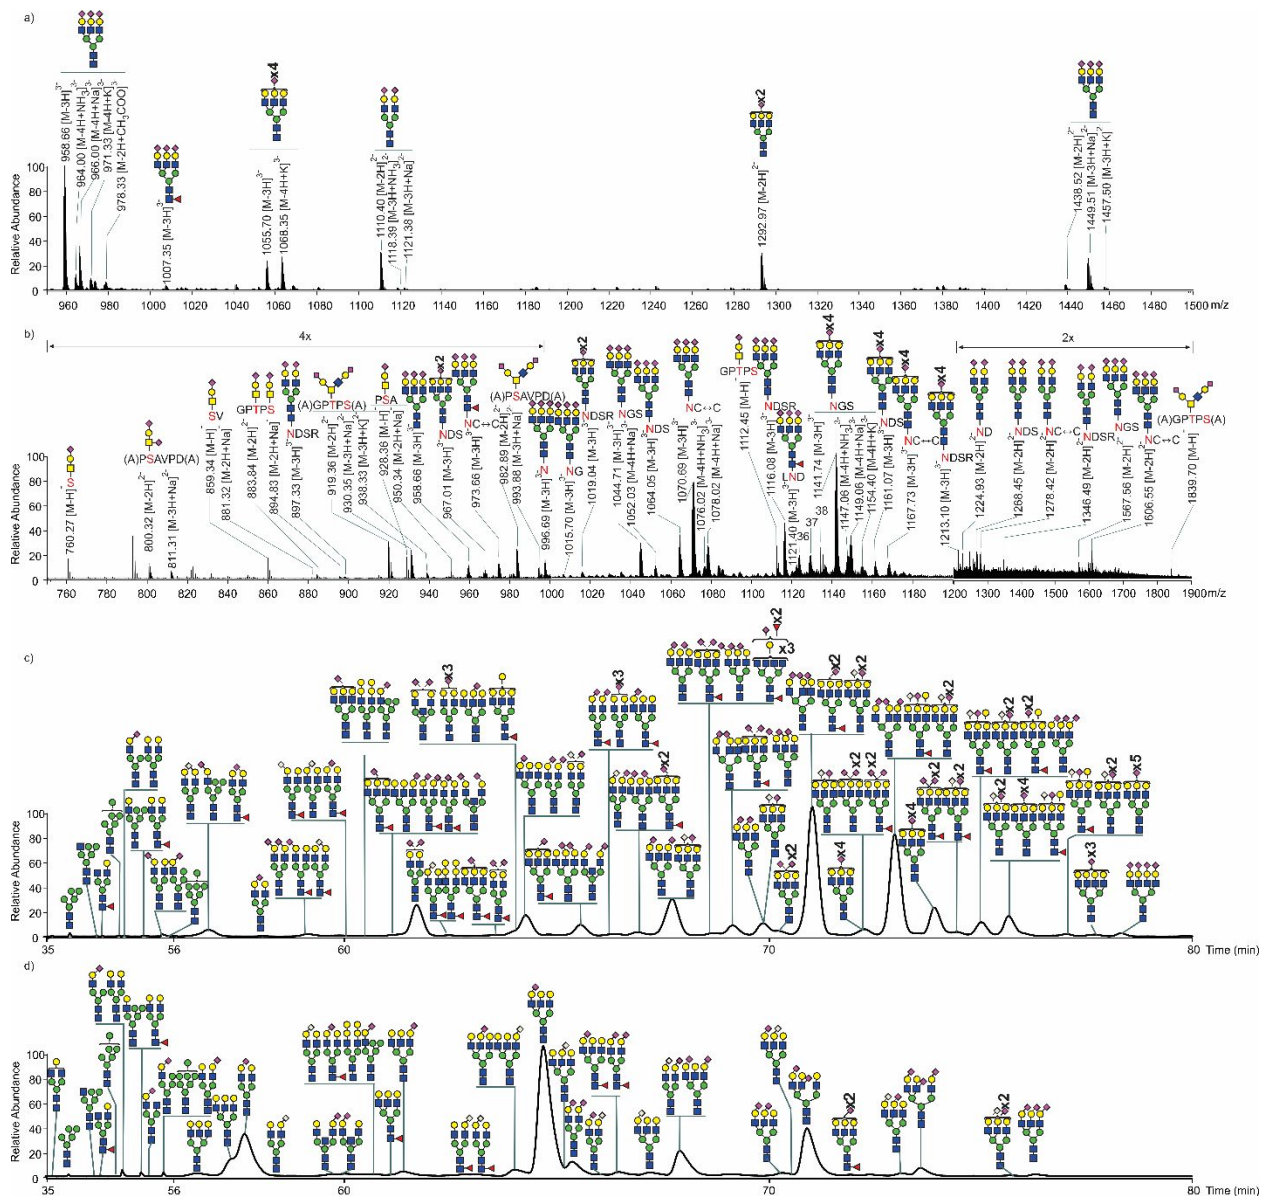

**Figure S4.** Glycan composition of bovine fetuin (BF). Representative ESI mass spectra of glycans and glycopeptides derived from BF using (a) PNGase F or (b) Pronase digestion in ammonium acetate (200 mM, pH 6.8) solutions. HILIC chromatogram of (c) BF glycans labeled with procainamide; (d) NeuS-treated BF glycans labeled with procainamide.

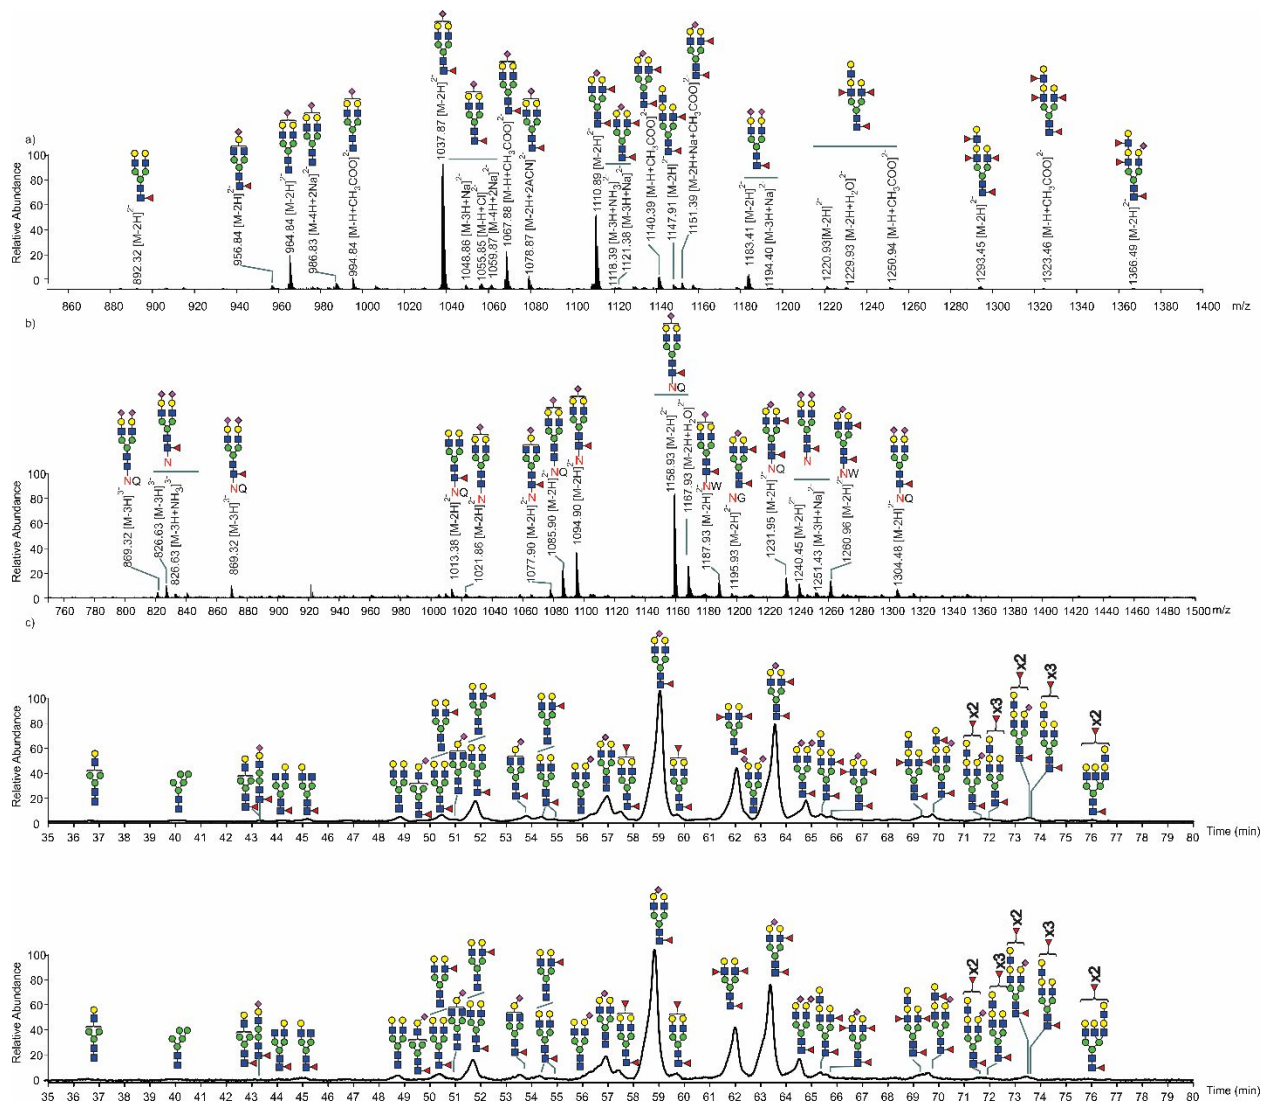

**Figure S5.** Glycan composition of human lactoferrin (HF). Representative ESI mass spectra of glycans and glycopeptides derived from HF using (a) PNGase F or (b) Pronase digestion in ammonium acetate (200 mM, pH 6.8) solutions. HILIC chromatogram of (c) HF glycans labeled with procainamide; (d) NeuS-treated HF glycans labeled with procainamide.

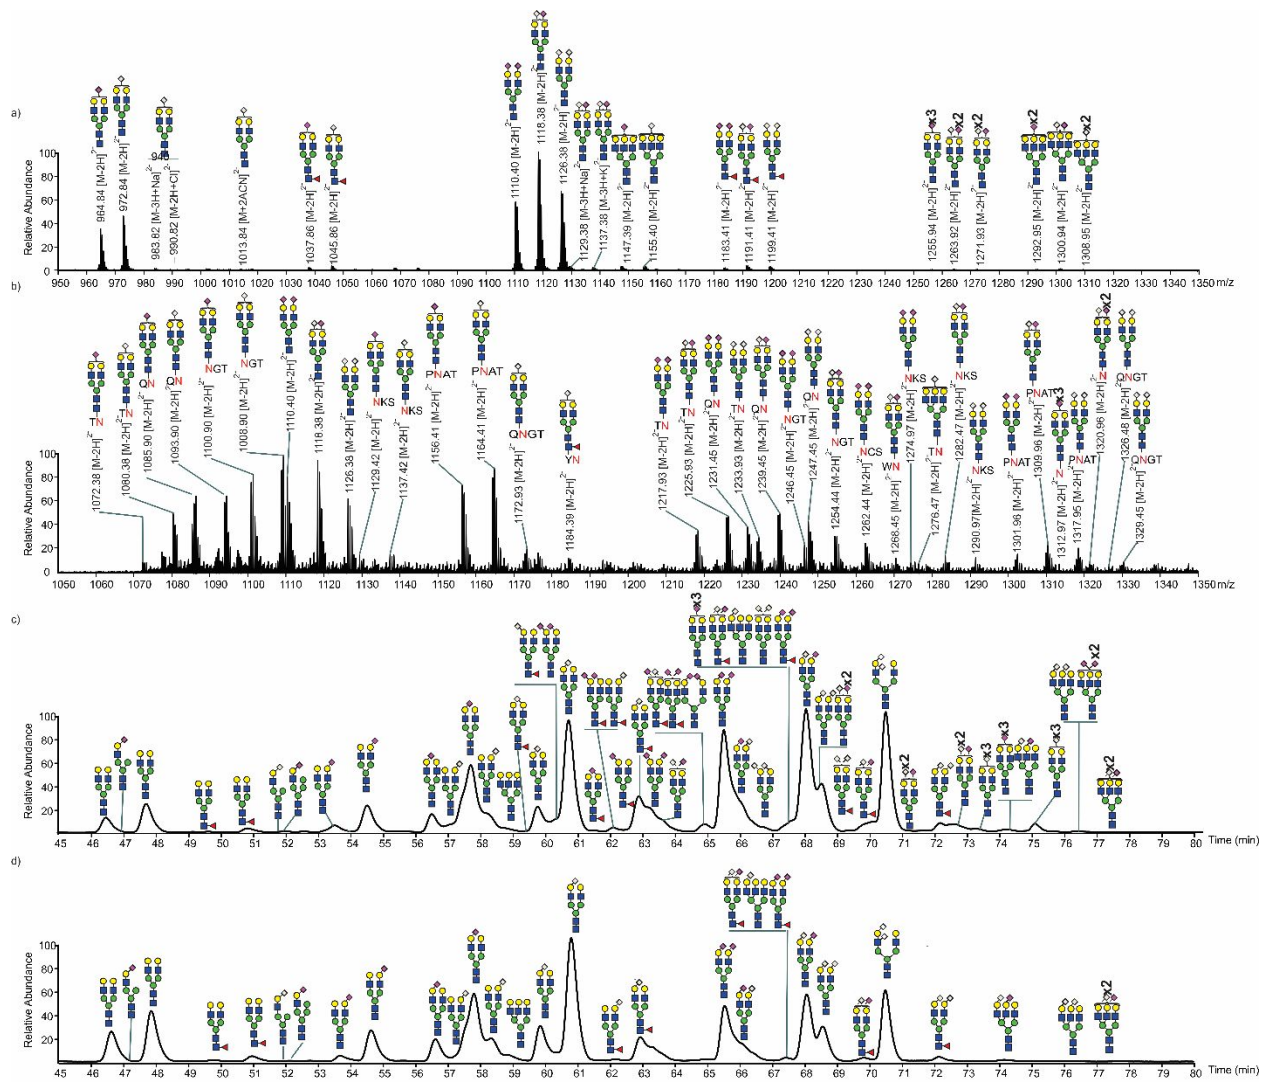

**Figure S6.** Glycan composition of bovine AGP (bAGP). Representative ESI mass spectra of glycans and glycopeptides derived from bAGP using (a) PNGase F or (b) Pronase digestion in ammonium acetate (200 mM, pH 6.8) solutions. HILIC chromatogram of (c) bAGP glycans labeled with procainamide; (d) NeuS-treated bAGP glycans labeled with procainamide.

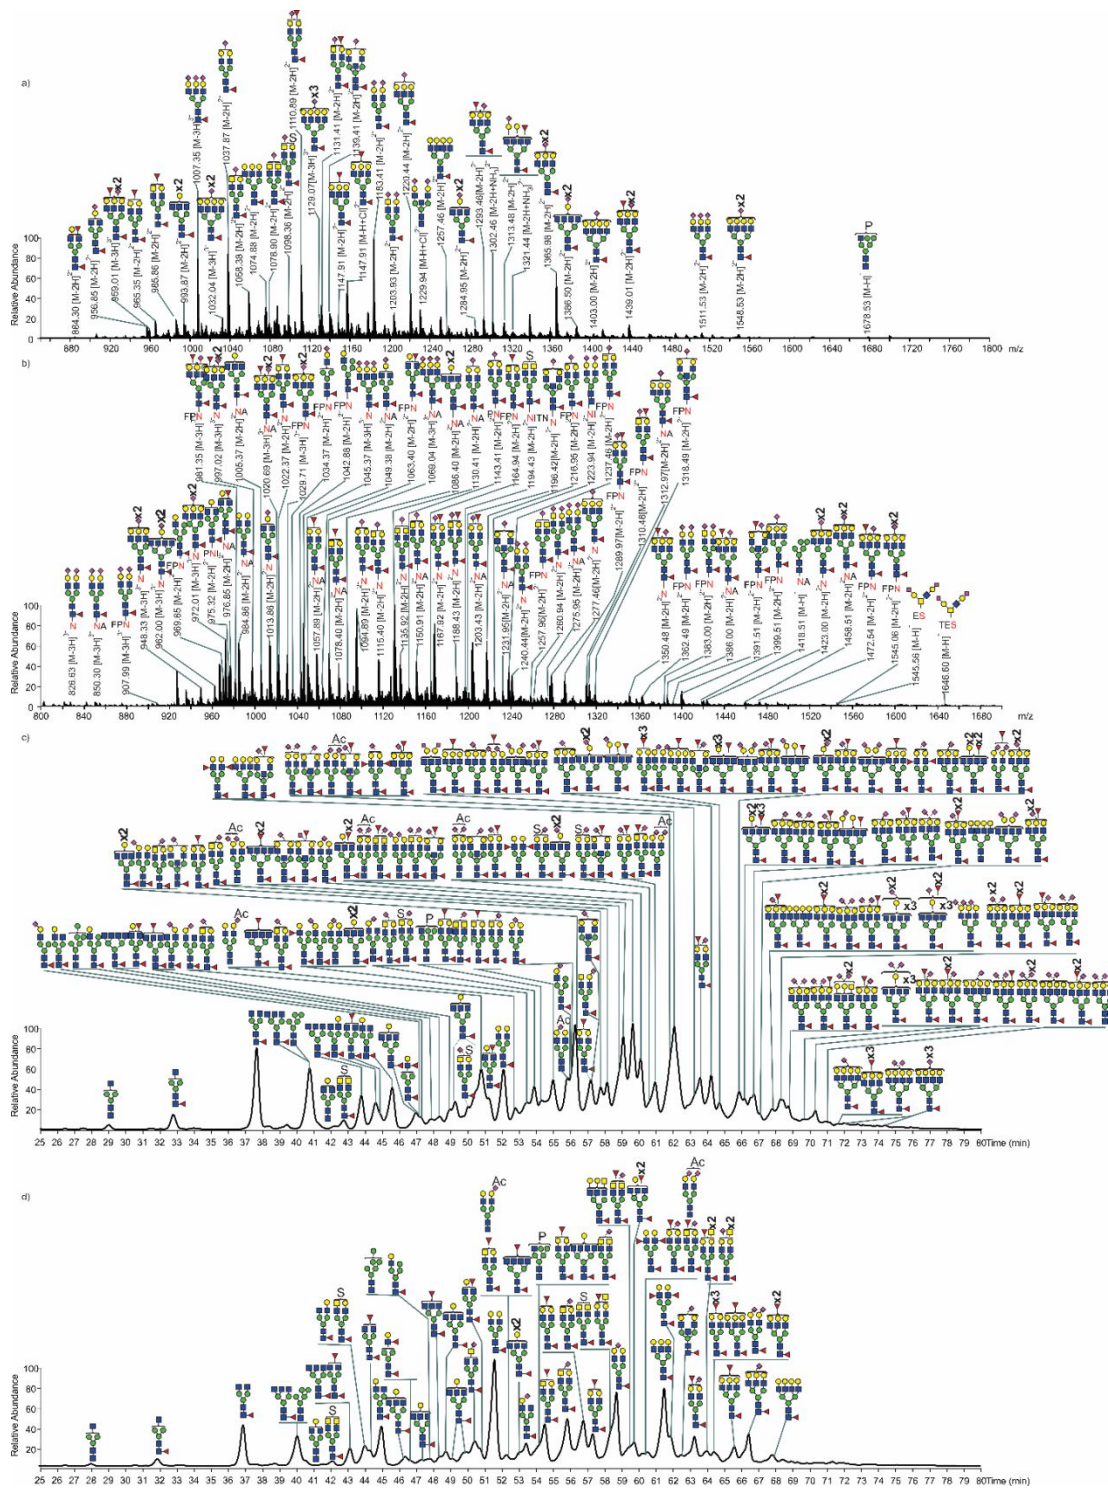

**Figure S7.** Glycan composition of SARS-CoV-2 RBD. Representative ESI mass spectra of glycans and glycopeptides derived from RBD using (a) PNGase F or (b) Pronase digestion in ammonium acetate (200 mM, pH 6.8) solutions. HILIC chromatogram of (c) RBD glycans labeled with procainamide; (d) NeuS-treated RBD glycans labeled with procainamide.

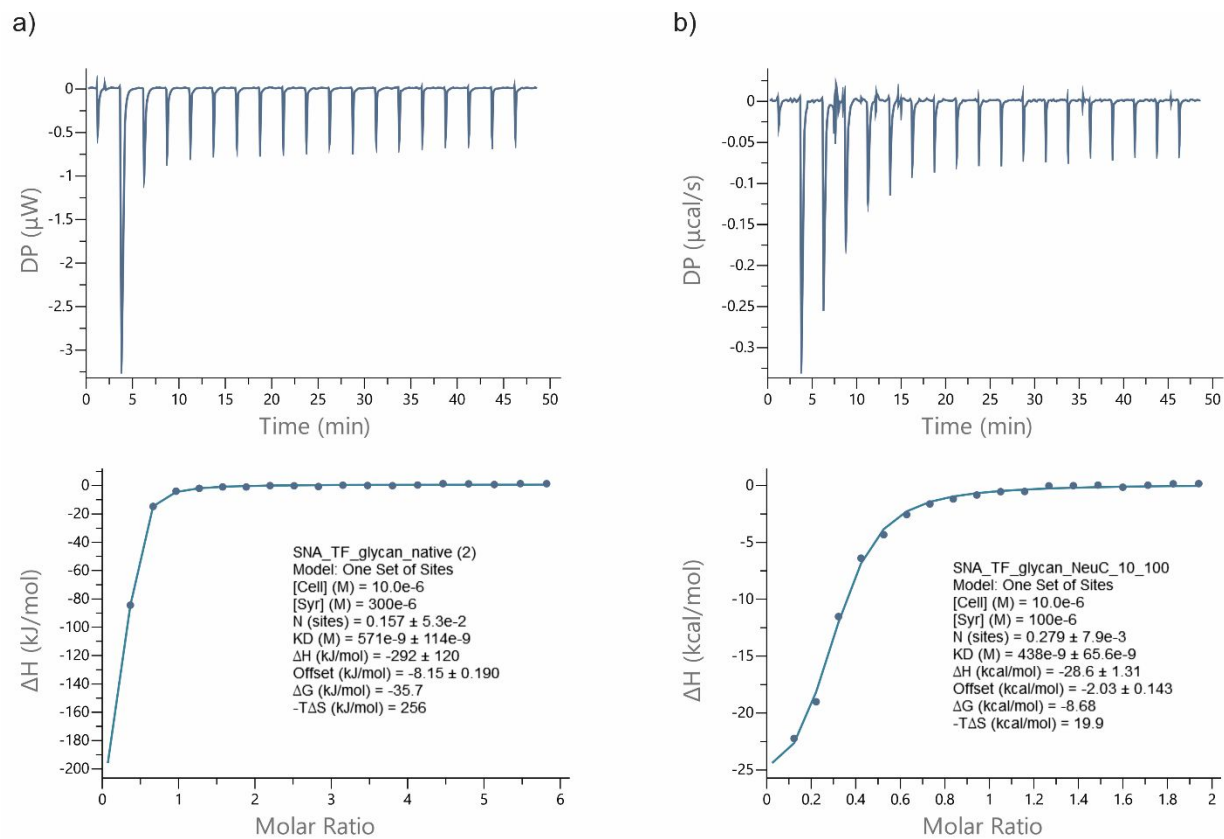

**Figure S8.** ITC data measured for SNA (10  $\mu\text{M}$ ) binding to (a) *N*-glycans from TF (0.3 mM) and (b) *N*-glycan from NeuC-treated TF (0.1 mM) in aqueous ammonium acetate (200 mM, pH 6.9 and 25  $^{\circ}\text{C}$ ).

a)

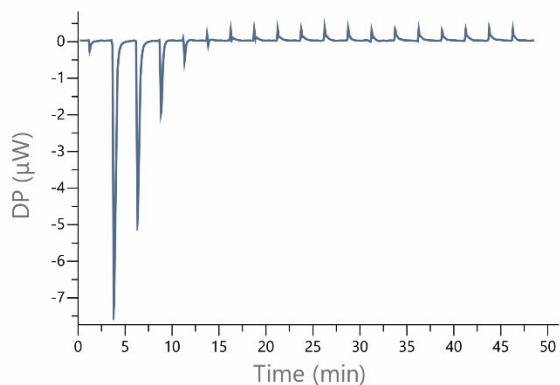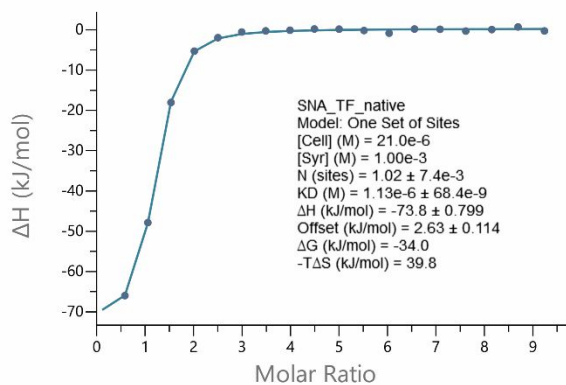

b)

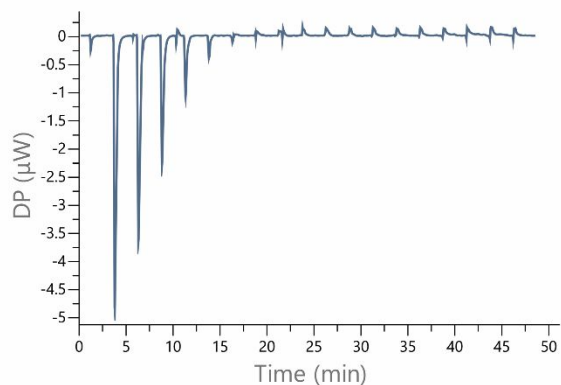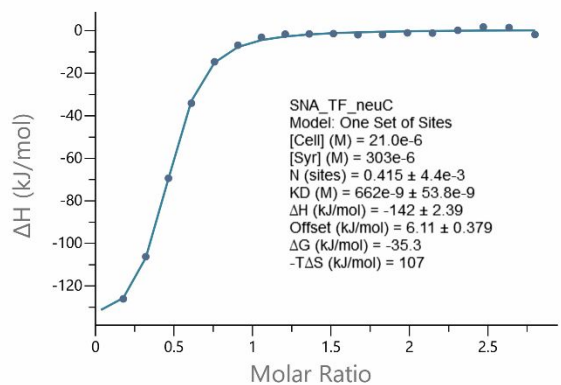

**Figure S9.** ITC data measured for SNA (21  $\mu\text{M}$ ) binding to (a) TF (0.5 mM) and (b) NeuC-treated TF (0.3 mM) in aqueous ammonium acetate (200 mM, pH 6.9 and 25  $^{\circ}\text{C}$ ).



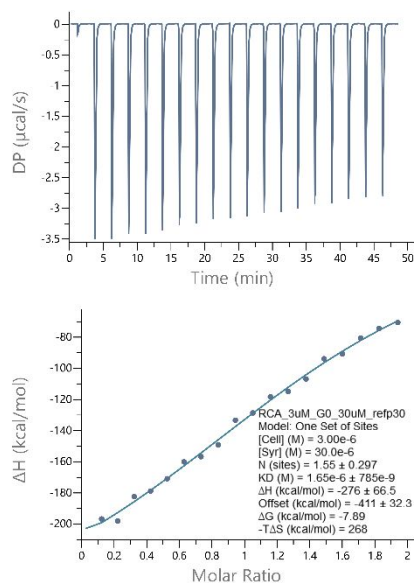

**Figure S10.** ITC data measured for RCA-I (3  $\mu\text{M}$ ) binding to G34 ( , 30  $\mu\text{M}$ ) in aqueous ammonium acetate (200 mM, pH 6.9 and 25  $^{\circ}\text{C}$ ).

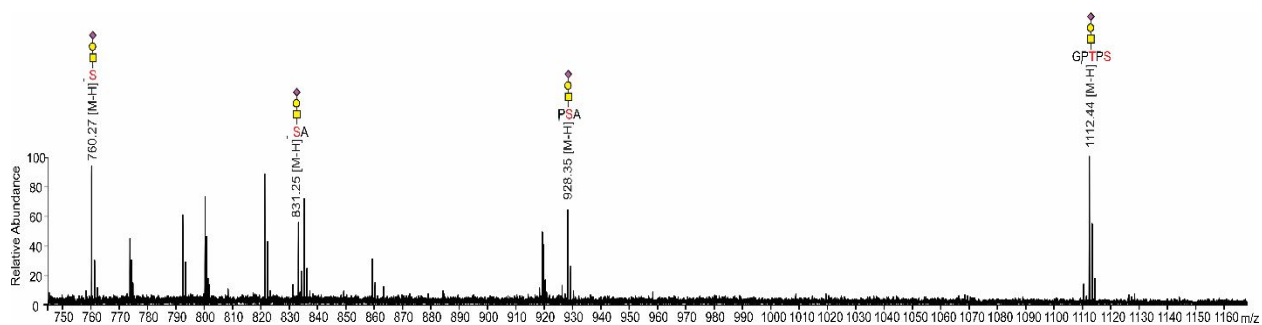

**Figure S11.** Representative mass spectrum measured by CaR-nMS (CE 90) performed on an ammonium acetate solution (200 mM, pH 6.8) of Sig7-Fc (2  $\mu\text{M}$ ) and a pronase digest of RBD and BF.

## References

- (S1) Moremen, K. W.; Ramiah, A.; Stuart, M.; Steel, J.; Meng, L.; Forouhar, F.; Moniz, H. A.; Gahlay, G.; Gao, Z.; Chapla, D.; Wang, S.; Yang, J.-Y.; Prabhakar, P. K.; Johnson, R.; Rosa, M. dela; Geisler, C.; Nairn, A. V.; Seetharaman, J.; Wu, S.-C.; Tong, L.; Gilbert, H. J.; LaBaer, J.; Jarvis, D. L. Expression System for Structural and Functional Studies of Human Glycosylation Enzymes. *Nat. Chem. Biol.* **2018**, *14*, 156–162.
- (S2) Li, Z.; Kitov, P. I.; Kitova, E. N.; Bui, D. T.; Moremen, K. W.; Wakarchuk, W. W.; Mahal, L. K.; Macauley, M. S.; Klassen, J. S. Quantifying Carbohydrate-Active Enzyme Activity with Glycoprotein Substrates Using Electrospray Ionization Mass Spectrometry and Center-of-Mass Monitoring. *Anal. Chem.* **2021**, *93*, 15262-15270.
- (S3) Bui, D. T.; Jung, J.; Kitova, E. N.; Li, Z.; Willows, S. D.; Boddington, M. E.; Kitov, P. I.; Mason, A. L.; Capicciotti, C. J.; Mahal, L. K.; Macauley, M. S.; Klassen, J. S. Mass Spectrometry-Based Shotgun Glycomics Using Labeled Glycan Libraries. *Anal. Chem.* **2022**, *94*, 4997–5005.
- (S4) Stanley, P.; Taniguchi, N.; Aebi, M. N-Glycans.; Varki, A., Cummings, R. D., Esko, J. D., Stanley, P., Hart, G. W., Aebi, M., Darvill, A. G., Kinoshita, T., Packer, N. H., Prestegard, J. H., Schnaar, R. L., Seeberger, P. H., Eds.; Cold Spring Harbor (NY), 2015; pp 99–111.
- (S5) Walsh, I.; O’Flaherty, R.; Rudd, P. M. Bioinformatics Applications to Aid High-Throughput Glycan Profiling. *Perspect. Sci.* **2017**, *11*, 31–39.
- (S6) Gut, H.; King, S. J.; Walsh, M. A. Structural and Functional Studies of Streptococcus Pneumoniae Neuraminidase B: An Intramolecular Trans-Sialidase. *FEBS Lett.* **2008**, *582*, 3348–3352.
- (S7) Kitov, P. I.; Han, L.; Kitova, E. N.; Klassen, J. S. Sliding Window Adduct Removal Method (SWARM) for Enhanced Electrospray Ionization Mass Spectrometry Binding Data. *J. Am. Soc. Mass Spectrom.* **2019**, *30*, 1446–1454.
- (S8) Nguyen, L.; McCord, K. A.; Bui, D. T.; Bouwman, K. M.; Kitova, E. N.; Elaish, M.; Kumawat, D.; Daskhan, G. C.; Tomris, I.; Han, L.; Chopra, P.; Yang, T.-J.; Willows, S. D.; Mason, A. L.; Mahal, L. K.; Lowary, T. L.; West, L. J.; Hsu, S.-T. D.; Hobman, T.; Tompkins, S. M.; Boons, G.-J.; de Vries, R. P.; Macauley, M. S.; Klassen, J. S. Sialic Acid-Containing Glycolipids Mediate Binding and Viral Entry of SARS-CoV-2. *Nat. Chem. Biol.* **2022**, *18*, 81-90.
- (S9) Han, L.; Kitova, E. N.; Tan, M.; Jiang, X.; Pluvinae, B.; Boraston, A. B.; Klassen, J. S. Affinities of Human Histo-Blood Group Antigens for Norovirus Capsid Protein Complexes. *Glycobiology* **2015**, *25*, 170–180.
- (S10) Shams-Ud-Doha, K.; Kitova, E. N.; Kitov, P. I.; St-Pierre, Y.; Klassen, J. S. Human Milk Oligosaccharide Specificities of Human Galectins. Comparison of Electrospray Ionization Mass Spectrometry and Glycan Microarray Screening Results. *Anal. Chem.* **2017**, *89*, 4914–4921.

(S11) Rodrigues, E.; Jung, J.; Park, H.; Loo, C.; Soukhtehzari, S.; Kitova, E. N.; Mozaneh, F.; Daskhan, G.; Schmidt, E. N.; Aghanya, V.; Sarkar, S.; Streith, L.; St. Laurent, C. D.; Nguyen, L.; Julien, J.-P.; West, L. J.; Williams, K. C.; Klassen, J. S.; Macauley, M. S. A Versatile Soluble Siglec Scaffold for Sensitive and Quantitative Detection of Glycan Ligands. *Nat. Commun.* **2020**, *11*, 5091.
