# Supplementary material
Source: PubMed Central journal article supplement (PMC10375891)
Supplement: oc3c00294_si_002.pdf [file oc3c00294_si_002.pdf]

**Supporting Information File 2 for:**

**Absolute Affinities from Quantitative Shotgun Glycomics Using Concentration-Independent (COIN) Native Mass Spectrometry**

Duong T. Bui,<sup>1</sup> James Favell,<sup>1</sup> Elena N. Kitova,<sup>1</sup> Zhixiong Li,<sup>1</sup> Kelli A. McCord,<sup>1</sup> Edward N. Schmidt<sup>1</sup>, Fahima Mozaneh,<sup>1</sup> Mohamed Elaish,<sup>2,3</sup> Amr El-Hawiet,<sup>4</sup> Yves St-Pierre,<sup>5</sup> Tom C. Hobman,<sup>2,6,7</sup> Matthew S. Macauley,<sup>1,6</sup> Lara K. Mahal,<sup>1</sup> Morris R. Flynn,<sup>8</sup> and John S. Klassen<sup>1\*</sup>

<sup>1</sup>*Department of Chemistry, University of Alberta, Edmonton, Alberta, Canada T6G 2G2*

<sup>2</sup>*Department of Cell Biology, University of Alberta, Edmonton, AB, Canada T6G 2H7*

<sup>3</sup>*Poultry Diseases Department, Faculty of Veterinary Medicine, Cairo University, Giza, Egypt*

<sup>4</sup>*Department of Pharmacognosy, Faculty of Pharmacy, Alexandria University, Alexandria, Egypt*

<sup>5</sup>*Institut National de la Recherche Scientifique (INRS), INRS-Centre Armand-Frappier Santé Biotechnologie, Laval, QC, Canada H7V 1B7*

<sup>6</sup>*Department of Medical Microbiology and Immunology, University of Alberta, Edmonton, AB, Canada T6G 2E1*

<sup>7</sup>*Li Ka Shing Institute of Virology, University of Alberta, Edmonton, Alberta, Canada. T6G 2E1*

<sup>8</sup>*Department of Mechanical Engineering, Faculty of Engineering, University of Alberta, Edmonton, Alberta, Canada T6G 1H9*

\* Corresponding Author:

Department of Chemistry

University of Alberta

Edmonton, AB CANADA T6G 2G2

Email: john.klassen@ualberta.ca

Telephone: (780) 492-3501

<https://orcid.org/0000-0002-3389-7112>

## Mathematical model for mixing of two solutions in nanoESI emitter

To provide a theoretical framework to interpret the experimental results, we consider the idealized one-dimensional problem of diffusion in a long capillary of length  $L$  and (constant) diameter  $d$  – see Figure S2-1. Mimicking experimental conditions, we allow the solute to be transported both by diffusion and also by advection, though we assume that the latter effect is small in a way to be quantified later. Using subscripts to indicate partial differentiation with respect to time ( $t$ ) and space ( $x$ ), the equation governing the spatio-temporal evolution of the solute concentration,  $c$ , is

$$c_t + uc_x = Dc_{xx}, \quad (1)$$

where  $D$  is the diffusion coefficient and  $u$  is the advection velocity, which, for analytical convenience, we assume to be constant. Note that  $u = Q/(\pi d^2/4)$  in which  $Q$  is the volumetric flow rate of the liquid through the capillary. It is advantageous to non-dimensionalize eq 1 by introducing non-dimensional variables for space  $\xi$  ( $x = \xi L$ ) and time  $\tau$  ( $t = \tau L^2/D$ ). Then we can rewrite eq 1 as

$$(c/c_0)_\tau + \text{Pe}(c/c_0)_\xi = (c/c_0)_{\xi\xi}, \quad (2)$$

in which  $c_0$  is the initial solute concentration as measured in the region  $x < \ell$  where the horizontal distance  $\ell$  is defined in Figure S2-1. The Peclet number,  $\text{Pe}$ , is defined as  $\text{Pe} = uL/D$ .

Eq 2 makes reference to the non-dimensional concentration  $c/c_0$ , however, it is advantageous to consider the evolution of the non-dimensional concentration deficit, defined as  $\sigma = 1 - c/c_0$ .

Whereas  $\sigma$  solves the same governing equation as  $c/c_0$ , i.e.

$$\sigma_t + \text{Pe} \sigma_\xi = \sigma_{\xi\xi}, \quad (3)$$

we can transform the above equation into a standard heat equation by applying the transformation

$$\sigma(\zeta, \tau) = \exp\left[\frac{1}{2} \text{Pe} \left(\zeta - \frac{1}{2} \text{Pe} \tau\right)\right] v(\zeta, \tau), \quad (4)$$

such that  $v$  satisfies

$$v_\tau = v_{\zeta\zeta} \quad (5)$$

Boundary conditions relevant to the above governing equations are as follows. At  $x = 0$ ,

$\zeta = 0$ , i.e. on the left-hand side of the capillary,

$$c(0, t) = c_0 \Rightarrow \sigma(0, \tau) = 0 \Rightarrow v(0, \tau) = 0. \quad (6)$$

At  $x = L$ ,  $\zeta = 1$ , i.e. on the right-hand side of the capillary,

$$c_x(L, t) = 0 \Rightarrow \sigma_\zeta(1, \tau) = 0 \Rightarrow v_\zeta(1, \tau) + \frac{1}{2} \text{Pe} v(1, \tau) = 0. \quad (7)$$

Also, at  $t = 0$ ,  $\tau = 0$ ,

$$c = c_0 [1 - H(x - l)] \Rightarrow \sigma(\zeta, 0) = H\left(\zeta - \frac{l}{L}\right) \Rightarrow v(\zeta, 0) = \exp\left(-\frac{1}{2} \text{Pe} \zeta\right) H\left(\zeta - \frac{l}{L}\right), \quad (8)$$

where  $H$  denotes the Heaviside step function.

To solve eq 5, we assume a separable solution of the form

$$v(\zeta, \tau) = X(\zeta)T(\tau). \quad (9)$$

Substitution of eq 9 into eq 5 shows that

$$X_n(\zeta) = A_n \cos \lambda_n \zeta + B_n \sin \lambda_n \zeta, \quad (10)$$

where  $\lambda_n$  is the sequence of eigenvalues with  $n = 1, 2, 3$  and  $A_n$  and  $B_n$  are integration constants. Subsequent application of the left- and right-hand side boundary conditions confirm that  $A_n = 0$  whereas the eigenvalues satisfy a transcendental equation of the form

$$\tan \lambda_n = -\frac{\lambda_n}{\frac{1}{2} \text{Pe}} \quad (11)$$

The first (trivial) root of eq 11 is  $\lambda_1 = 0$  whereby  $\sin \lambda_1 \zeta = 0$ . Thereafter, and to good approximation for small Pe,

$$\lambda_2 \approx \frac{\pi}{2} \quad \lambda_3 \approx \frac{3\pi}{2} \quad \lambda_4 \approx \frac{5\pi}{2}. \quad (12)$$

In the interests of maintaining an orthogonal set of basis functions, we consider as a generic solution for  $X_n$ :

$$X_n(\zeta) = B_n \sin \left[ \left( n - \frac{1}{2} \right) \pi \zeta \right], \quad n = 1, 2, 3, \dots, \quad (13)$$

such that

$$T_n(\tau) = C_n \exp \left[ - \left( n - \frac{1}{2} \right)^2 \pi^2 \tau \right]. \quad (14)$$

Combining eq 13 and eq 14 and using superposition yields the small-Pe solution for  $v$

$$v(\zeta, \tau) = \sum_{n=1}^{\infty} b_n \sin \left[ \left( n - \frac{1}{2} \right) \pi \zeta \right] \exp \left[ - \left( n - \frac{1}{2} \right)^2 \pi^2 \tau \right] \quad (15)$$

where the Fourier coefficients  $b_n$  satisfy

$$b_n = 2 \int_0^1 \exp\left(-\frac{1}{2} \text{Pe} \zeta\right) \sin\left[\left(n - \frac{1}{2}\right) \pi \zeta\right] \text{H}\left(\zeta - \frac{l}{L}\right) d\zeta. \quad (16)$$

Using the above solution for  $v$ , eq 4 can be solved for  $\sigma$  and the normalized concentration  $c/c_0 = 1 - \sigma$  can be found.

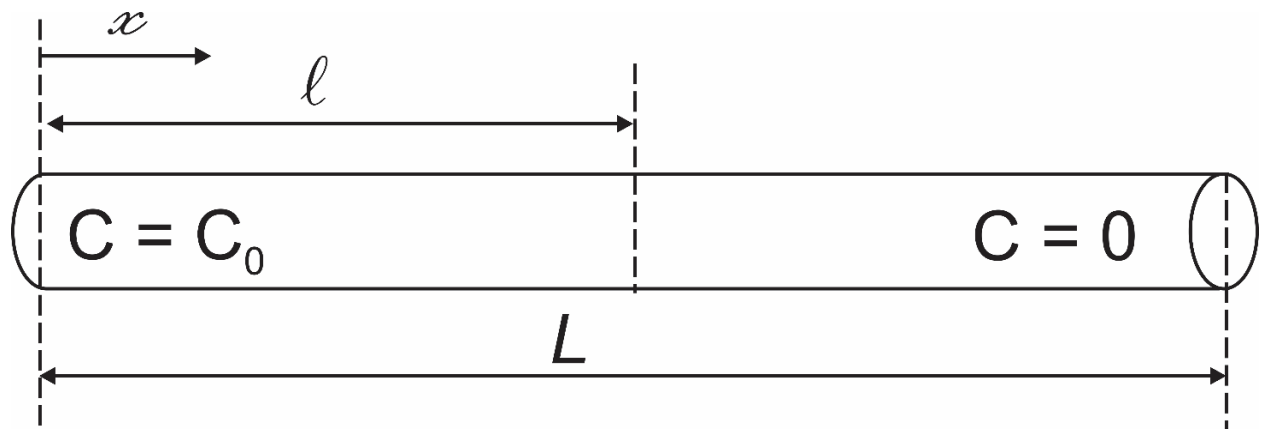

**Figure S2-1.** Capillary tube schematic. We assume that the solute (whose initial concentration in the region  $x < l$  or  $\xi < l/L$  is  $c_0$ ) is transported by a combination of diffusion and (slow) left-to-right advection.
